# Supplementary material for: Burn injury, gender and cancer risk: population-based cohort study using data from Scotland and Western Australia
Source: PubMed Central journal article supplement — BMJ Open. 2014 Jan 17;4(1):e003845. doi: 10.1136/bmjopen-2013-003845 (PMC3902327; doi:10.1136/bmjopen-2013-003845), 2014-01-17
Supplement: bmjopen-2013-003845.draft_revisions.pdf [file bmjopen-2013-003845.draft_revisions.pdf]

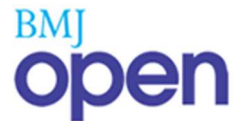

**Burn injury, gender and cancer risk: population-based cohort study using data from Scotland and Western Australia**

|                                 |                                                                                                                                                                                                                                                                                                                                                                                                                                                                                                                                                                                                                                                                                                                                                         |
|---------------------------------|---------------------------------------------------------------------------------------------------------------------------------------------------------------------------------------------------------------------------------------------------------------------------------------------------------------------------------------------------------------------------------------------------------------------------------------------------------------------------------------------------------------------------------------------------------------------------------------------------------------------------------------------------------------------------------------------------------------------------------------------------------|
| Journal:                        | <i>BMJ Open</i>                                                                                                                                                                                                                                                                                                                                                                                                                                                                                                                                                                                                                                                                                                                                         |
| Manuscript ID:                  | bmjopen-2013-003845                                                                                                                                                                                                                                                                                                                                                                                                                                                                                                                                                                                                                                                                                                                                     |
| Article Type:                   | Research                                                                                                                                                                                                                                                                                                                                                                                                                                                                                                                                                                                                                                                                                                                                                |
| Date Submitted by the Author:   | 19-Aug-2013                                                                                                                                                                                                                                                                                                                                                                                                                                                                                                                                                                                                                                                                                                                                             |
| Complete List of Authors:       | Duke, Janine; University of Western Australia, School of Surgery, Burn Injury Research Unit<br>Bauer, Jacqui; Curtin University, Population Health Research Network, Centre for Data Linkage<br>Fear, Mark; University of Western Australia, School of Surgery, Burn Injury Research Unit<br>Rea, Suzanne; University of Western Australia, School of Surgery, Burn Injury Research Unit; Burns Service of Western Australia, Royal Perth and Princess Margaret Hospitals<br>Wood, Fiona; University of Western Australia, School of Surgery, Burn Injury Research Unit; Burns Service of Western Australia, Royal Perth and Princess Margaret Hospitals<br>Boyd, James; Curtin University, Population Health Research Network, Centre for Data Linkage |
| <b>Primary Subject Heading</b>: | Epidemiology                                                                                                                                                                                                                                                                                                                                                                                                                                                                                                                                                                                                                                                                                                                                            |
| Secondary Subject Heading:      | Research methods                                                                                                                                                                                                                                                                                                                                                                                                                                                                                                                                                                                                                                                                                                                                        |
| Keywords:                       | Health informatics < BIOTECHNOLOGY & BIOINFORMATICS, EPIDEMIOLOGY, International health services < HEALTH SERVICES ADMINISTRATION & MANAGEMENT, Epidemiology < ONCOLOGY, PUBLIC HEALTH                                                                                                                                                                                                                                                                                                                                                                                                                                                                                                                                                                  |
|                                 |                                                                                                                                                                                                                                                                                                                                                                                                                                                                                                                                                                                                                                                                                                                                                         |

SCHOLARONE™  
Manuscripts

1  
2  
3 **Burn injury, gender and cancer risk: population-based cohort study using data from Scotland and**  
4 **Western Australia**  
5

6 Janine M. Duke,<sup>1</sup> Jacqui Bauer,<sup>2</sup> Mark W. Fear,<sup>1</sup> Suzanne Rea,<sup>1,3</sup> Fiona M. Wood,<sup>1,3,4</sup> James Boyd  
7  
8 <sup>2</sup>

- 9  
10 1. Burn Injury Research Unit, School of Surgery, University of Western Australia, Western  
11 Australia  
12  
13 2. Population Health Research Network, Centre for Data Linkage, Curtin University, Western  
14 Australia  
15  
16 3. Burns Service of Western Australia, Royal Perth Hospital and Princess Margaret Hospital,  
17 Western Australia  
18  
19 4. Fiona Wood Foundation, Western Australia  
20  
21  
22  
23

24 **Authors:**  
25

- 26  
27 1. Janine M. Duke  
28 Associate Professor  
29

30  
31 Burn Injury Research Unit, School of Surgery, Faculty of Medicine, Dentistry and Health Sciences, The  
32 University of Western Australia, M318 35 Stirling Highway, Crawley, 6009, Western Australia  
33

- 34  
35 2. Jacqui Bauer  
36 Research Associate  
37

38  
39 Population Health Research Network, Centre for Data Linkage, Curtin University, Perth, 6845,  
40 Western Australia  
41

- 42  
43 3. Mark W. Fear  
44 Associate Professor  
45

46  
47 Burn Injury Research Unit, School of Surgery, Faculty of Medicine, Dentistry and Health Sciences, The  
48 University of Western Australia, M318 35 Stirling Highway, Crawley, 6009, Western Australia  
49

- 50  
51 4. Suzanne Rea  
52 Professor, Burns Surgeon  
53

54  
55 Burns Service of Western Australia, Royal Perth Hospital and Princess Margaret Hospital, Perth 6000  
56  
57  
58  
59  
60

1  
2  
3 Burn Injury Research Unit, School of Surgery, Faculty of Medicine, Dentistry and Health Sciences, The  
4 University of Western Australia, M318 35 Stirling Highway, Crawley, 6009, Western Australia

5  
6  
7 5. Fiona M. Wood

8 Professor, Burns Surgeon, Director of Burns Service of Western Australia

9  
10  
11 Burn Injury Research Unit, School of Surgery, Faculty of Medicine, Dentistry and Health Sciences, The  
12 University of Western Australia, M318 35 Stirling Highway, Crawley, 6009, Western Australia

13  
14 Burns Service of Western Australia, Royal Perth Hospital, Perth, Western Australia

15  
16 Fiona Wood Foundation, Perth, Western Australia

17  
18  
19 6. James Boyd

20 Associate Professor

21  
22 Population Health Research Network, Centre for Data Linkage, Curtin University, Perth, 6845,  
23 Western Australia

24  
25  
26  
27  
28  
29 **\*Address for correspondence:**

30 Associate Professor Janine M. Duke

31  
32  
33 Email: [janine.duke@uwa.edu.au](mailto:janine.duke@uwa.edu.au)

1  
2  
3 **Funding support:** This research received no specific funding. Project data costs were supported by  
4 an Australian National Health and Medical Research Council research grant and a Raine Medical  
5 Research Foundation Priming grant. J.M.D. Senior Research Fellowship is supported by Woodside  
6 corporate sponsorship via the Fiona Wood Foundation.  
7  
8

9  
10 **Conflict of Interest Statement:** All authors declare: no support from any organisation for the  
11 submitted work; no financial relationships with any organisations that might have an interest in the  
12 submitted work in the previous three years, no other relationships or activities that could appear to  
13 have influenced the submitted work.  
14  
15

16  
17 **Article Word Count (Text only, excludes Abstract, References):** 3,507  
18

19  
20 **Number of Tables:** 4  
21

22 **Data sharing statement:** All authors have had access to the data  
23

24 The Corresponding Author has the right to grant on behalf of all authors and does grant on behalf of  
25 all authors, an exclusive licence (or non-exclusive for government employees) on a worldwide basis  
26 to the BMJ Publishing Group Ltd to permit this article (if accepted) to be published in BMJ editions  
27 and any other BMJ PGL products and sublicences such use and exploit all subsidiary rights, as set out  
28 in our licence.  
29  
30

31 **Contributions:**

32  
33 Janine Duke: Planning, conduct and reporting  
34

35 James Boyd: Planning, conduct and reporting  
36

37 Jacqui Bauer: Conduct and reporting  
38

39 Mark Fear: Reporting  
40

41 Suzanne Rea: Reporting  
42

43 Fiona Wood: Reporting  
44

45 **Guarantors:**

46  
47 Janine Duke  
48

49 James Boyd  
50  
51  
52  
53  
54  
55  
56  
57  
58  
59  
60

1  
2  
3 **Article Focus**  
4

- 5 • Burn injury not only affects the skin but also has other systemic effects
  - 6 • Inflammatory and immune response to burns may mediate cancer risk
  - 7 • Gender differences in cancer risk after burn injury may be related to the immune response
- 8  
9

10 **Key messages**  
11

- 12 • Burn injury can have impacts on longer term health
  - 13 • Increased risk of some cancers post-burn injury is greater in females than males
- 14

15 **Strengths and Limitations**  
16

- 17 • Population-level linked administrative data minimises issues of selection and reporting bias,  
18 and loss to follow-up
  - 19 • Consistency of results using population-level data from two patient populations provides  
20 greater support for link between burn injury and some cancers
  - 21 • Unable to examine impact of burn severity on cancer risk due to lack of available data
- 22  
23  
24  
25  
26  
27  
28  
29  
30  
31  
32  
33  
34  
35  
36  
37  
38  
39  
40  
41  
42  
43  
44  
45  
46  
47  
48  
49  
50  
51  
52  
53  
54  
55  
56  
57  
58  
59  
60

1  
2  
3 **Burn injury, gender and cancer risk: population-based cohort study using data from Scotland and**  
4 **Western Australia**

5  
6 **Abstract**

7  
8 **Objective:** To investigate risk of cancer and potential gender effects in persons hospitalised with  
9 burn injury.

10  
11 **Design:** Population-based retrospective cohort study using record-linkage systems in Scotland and  
12 Western Australia

13  
14 **Subjects:** Records of 37,890 and 23,450 persons admitted with a burn injury in Scotland and  
15 Western Australia, respectively, from 1983 to 2008. De-identified extraction of all linked hospital  
16 morbidity records, mortality and cancer records were provided by the Information Service Division  
17 Scotland and the Western Australian Data Linkage Service.

18  
19 **Main outcome measures:** Total and gender specific numbers of observed and expected cases of all-  
20 cause and site-specific cancers and standardised incidence ratios.

21  
22 **Results:** From 1983-2008, for female burn survivors there was a greater number of observed versus  
23 expected notifications of all-cause cancer with 1011 (standardised incidence ratio (SIR), 95%  
24 confidence interval (CI): 1.3, 1.2 to 1.4) and 244 (SIR, 95%CI: 1.12, 1.05 to 1.30), respectively, for  
25 Scotland and Western Australia. No statistically significant difference in all-cause cancer risk was  
26 found for males. Significant excesses in observed cancers amongst burn survivors (combined gender)  
27 in Scotland and Western Australian were found for buccal cavity, liver, larynx and respiratory tract,  
28 and for cancers of the female genital tract.

29  
30 **Conclusions:** Results from the Scotland data confirmed the increased risk of 'all-cause' cancer  
31 previously observed amongst female burn survivors in Western Australia. The gender dimorphism  
32 observed in this study may be related to the role of gender in the immune response to burn injury.  
33 More research is required to understand the underlying mechanism(s) that may link burn injury with  
34 an increased risk of some cancers.  
35  
36  
37  
38  
39  
40  
41  
42  
43  
44  
45  
46  
47  
48  
49  
50  
51  
52  
53  
54  
55  
56  
57  
58  
59  
60

## Burn injury, gender and cancer risk: population-based cohort study using data from Scotland and Western Australia

### 1. Introduction

The burden of burn injury is a significant issue, not only in terms of the acute care perspective but also the chronic health effects resulting from both the injury event and the subsequent treatments. While burns predominantly affect the skin, burns are associated with significant systemic effects<sup>1-3</sup>, depressed immune functioning<sup>4-8</sup> and prolonged periods of systemic catabolism and hypermetabolism.<sup>9</sup> Prompted by a clinical scenario of a diagnosis of hepatocellular carcinoma in a young male burn patient,<sup>10</sup> and the potential for malignancy after burn, an initial study of burn injury and all-cause cancer risk was undertaken.<sup>11</sup> Results of this study demonstrated a gender effect with female burn survivors having an increased risk of all-cause cancer.

This previous study of burn injury and cancer risk used population-based data linked by the Western Australian Data Linkage System (WADLS).<sup>12</sup> Data linkage in Western Australia provides one of only a handful of information-rich environments worldwide that have been constructed from the linkage of multiple, large, population-based, administrative datasets. The WADLS meets international best practice standards, determined by experiences from the Oxford Record Linkage Study, Scottish Record Linkage System, Rochester Epidemiology Project and the Manitoba Centre for Health Policy.<sup>12</sup> Western Australia has a population of approximately 2.2 million, and as such, did not support detailed gender and site-specific cancer incidence assessments with adequate statistical power. While the WADLS has systematically linked datasets of Western Australians since the 1970s, other Australian States and Territories have only recently established record linkage systems and were not able to support this study. To extend the population-base and enable further detailed examination of the observed gender effect and site specific cancer incidence, approval was sought to access the Scottish population-based record linkage system, the Information Service Division (ISD) Scotland,<sup>13</sup> that has routinely linked health data since the 1980s.

This paper reports a retrospective longitudinal study to explore cancer risk after burn injury using linked hospital morbidity, cancer and death data of persons hospitalised for burn injury in both Western Australia and Scotland. The study aimed to, firstly, confirm the increased risk of 'all-cause' cancer observed in the preliminary Western Australian study of female burn survivors using the Scottish data; and, secondly, examine site-specific cancer risk amongst survivors of burn injury.

### 2. Methods

Study data were obtained from the Western Australian Data Linkage Service (WADLS)<sup>12</sup> and the Information and Services Division (ISD Scotland) of the National Health Service National Services

1  
2  
3 Scotland<sup>13</sup> with approval from Curtin University, the Western Australia Department of Health Human  
4 Research Ethics Committees and the NHS National Services Scotland Privacy Advisory Committee.  
5 The WADLS and ISD Scotland are validated record linkage systems that routinely link administrative  
6 health data from core datasets for the entire population of Western Australia and Scotland,  
7 respectively.  
8  
9

10  
11 An index burn injury was defined as the first hospital admission with a burn injury using primary and  
12 additional diagnosis International Classification of Diseases (ICD) codes 940-949 (ICD9) and T20-T31  
13 (ICD10). A de-identified extraction of all linked hospital morbidity records (Hospital Morbidity Data  
14 System (HMDS), mortality (Death Register, Western Australia) and cancer records (Western Australia  
15 Cancer Registry (WACR)) for all persons admitted to hospital with an index burn injury in Western  
16 Australia, for the period 1 January 1983 to 31 December 2008, was performed by WADLS <sup>14</sup>. A  
17 corresponding de-identified extraction of all linked hospital morbidity records (Scottish Morbidity  
18 Records (SMR) 01), cancer registrations (SMR06) and death records (General Register Office for  
19 Scotland (GROS)) using the same burn cohort definition was undertaken by ISD Scotland. Hospital  
20 admissions data items included age at admission, gender, admission date, separation date, principal  
21 and additional diagnoses and external cause of injury.  
22  
23  
24  
25  
26  
27  
28  
29

30 The Western Australia Cancer Registry (WACR) was established in 1981 and is a population-based  
31 cancer registry based on mandatory notification of cancers from pathologists, haematologists and  
32 radiation oncologist, and cancer information from death records.<sup>15</sup> Amendments to the Health  
33 (Notification of Cancer) Regulations in 1996 required from that time, notifications of all in situ, non-  
34 melanoma skin cancers other than basal cell and squamous cell carcinomas, and, all other invasive  
35 malignancies and benign Central Nervous System tumours. <sup>15</sup> Malignant cancers are coded according  
36 to a modified Australian version of the International Classification of Diseases, Tenth Revision  
37 (ICD10-AM) and International Classification of Diseases for Oncology (ICD-O-3).  
38  
39  
40  
41  
42

43 The Scotland Cancer Registry (SMR06) has recorded all incident cancers in Scotland from 1958, and  
44 since 1997 registration has been centralised at ISD Scotland.<sup>16</sup> The registry is responsible for the  
45 collection of information on all new cases of primary malignant neoplasms, carcinoma in situ  
46 (including grade III intra-epithelial neoplasia), neoplasms of uncertain behaviour and (since 1 January  
47 2000) benign brain and spinal cord tumours arising in residents of Scotland. Data quality is  
48 monitored using routine indicators, computer validation and ad hoc studies of data accuracy and  
49 completeness of ascertainment.<sup>17 18</sup> The Scottish cancer notifications are coded using the  
50 International Classification of Diseases (ICD) and the International Classification of Diseases for  
51 Oncology (ICD-O).  
52  
53  
54  
55  
56  
57  
58  
59  
60



1  
2  
3 Methods for analysis have been previously published.<sup>11</sup> An incident cancer was defined as a cancer  
4 diagnosis notification (C00-C96, excluding C44) after hospital admission for index burn injury.  
5 Analysis was restricted to malignant neoplasm notifications (C00-C96, excluding C44) for which all-  
6 cause and site-specific cancer incident rates were provided by WACR and ISD Scotland for respective  
7 populations. Records were excluded from the analysis if the date of cancer diagnosis was prior to  
8 date of discharge for index burn hospitalisation. When a record was identified as having more than  
9 one malignant neoplasm notification, each neoplasm was counted as an individual record, however,  
10 if multiple tumours of the skin (C43) with identical morphological characteristics (that is, the first  
11 three digits ICD-O-3 morphology code) were identified, they were recorded only once. Gender and  
12 age-specific cancer (total C00-C96, excluding C44) incident rates for the Western Australian and  
13 Scottish populations were pooled for the calendar periods 1983-1988, 1989-1993, 1994-1998, 1999-  
14 2003 and 2004-2008 to allow for changes in population cancer incidence during the study period.

15  
16 For the determination of incident rates, the calculation of person-years began on the day of final  
17 hospital discharge for the index burn admission and the study observation period continued until  
18 date of cancer diagnosis, death, or 31<sup>st</sup> December 2008, whichever occurred first. The observed  
19 numbers of cases of cancer and person-years at risk were calculated by age (5-year age groups),  
20 gender and calendar period (1983-1988, 1989-1993, 1994-1998, 1999-2003 and 2004-2008). The  
21 expected numbers of cancer cases were estimated by multiplying the specific number of person  
22 years per category by the corresponding incidence of cancer in Western Australia, Scotland, and  
23 combined cancer incidence rates, provided by WACR and ISD Scotland. The Standardised Incident  
24 Ratios (SIRs) were calculated by dividing the observed number of cases by the number expected.<sup>19 20</sup>  
25 The 95% confidence intervals (95%CI) were defined under the assumption that the observed number  
26 of cancers followed the Poisson distribution.<sup>21</sup>

27  
28 Separate SIR analyses for all-cause and site-specific cancers were conducted using country specific  
29 data for respective burn patient cohorts (all burn depth) for cohorts hospitalised from 1983-2008;  
30 all-cause SIRs repeated for sub-cohorts of burn admissions from 1983-1987, with optimum follow-up  
31 time. To further explore the gender impact of burn injury on cancer risk, all-cause cancer SIR  
32 analyses were repeated on age-restricted sub-cohorts classified to reflect reproductive age at  
33 admission for burn injury: <15 years; 15-49 years; and, ≥50 years. All statistical analyses were  
34 performed using Stata statistical software V 11 (StataCorp LP, College Station, Tex).

### 3. Results

35  
36 As previously reported, in Western Australia from 1983 to 2008, there were 23,450 hospital index  
37 admissions for burn-related injury.<sup>14</sup> After exclusion of records with a history of cancer prior to  
38  
39  
40  
41  
42  
43  
44  
45  
46  
47  
48  
49  
50  
51  
52  
53  
54  
55  
56  
57  
58  
59  
60

1  
2  
3 separation date or death during hospital admission for burn, a total of 22,705 patient records were  
4 included in the analysis.<sup>11</sup> There were 673 patients with a first cancer notification after date of  
5 separation for burn injury hospitalisation, and with inclusion of multiple malignancies, 759 cancer  
6 notifications were included in the standardised incident ratio analyses as independent observations.  
7  
8

9  
10 In Scotland from 1983-2008, there were a total of 37,890 persons hospitalised for an index burn-  
11 related injury. After exclusion of those with a history of cancer prior to separation date or death  
12 during hospital admission for burn, a total of 37,506 patients were included in the analysis. There  
13 were 2,005 patients with a first cancer notification after date of separation for burn injury  
14 hospitalisation, and with inclusion of multiple malignancies, 2,260 cancer notifications were included  
15 in the standardised incident ratio analyses as independent observations. Characteristics of the  
16 Western Australia and Scotland cohorts are presented in Table 1.  
17  
18  
19  
20

21  
22 The Western Australia cohort (1983-2008; combined gender) was followed for a total of 283,306  
23 person-years, with mean follow-up time of 12.3 years (range: >0 – 25.9 years). Mean follow-up time  
24 for those with a cancer notification was 9.4 years (range: >0 – 25.4) and for those with no cancer  
25 notification, 12.4 years (range: >0 – 25.9). The Scotland cohort (1983-2008; combined gender) was  
26 followed for a total of 474,489 person-years, with mean follow-up time of 12.6 years (range: 0 -26.0  
27 years). Mean follow-up time for those with a cancer notification was 9.4 years (range: >0-25.8) and  
28 for those with no cancer notification, 12.7 years (range: >0-26.0).  
29  
30  
31  
32

33  
34 For the Scottish cohort of burn injury patients (combined gender) there was marginal but significant  
35 difference (SIR, 95%CI: 1.09, 1.05-1.10) in the overall risk of cancer for persons with a burn injury  
36 hospitalisation for the period 1983 to 2008, compared with the general population of Scotland.  
37 While a significant increase of 30% in cancer risk was estimated for females there was no difference  
38 in cancer risk for males, when compared with the general population of Scotland (refer to Table 2).  
39 For the sub-cohort of burn injury patients 1983-1988, the total observed number of cases of cancer  
40 (n=838) was statistically significantly lower than expected (n=953.4) with SIR (95%CI) of 0.88 (0.82 to  
41 0.94), with males having a statistically significantly lower number of cases observed than expected.  
42 Refer to Table 2 for gender specific SIRs for all-cause cancer for Scotland and Western Australian  
43 burn patients, hospitalised during 1983-1988 and 1983-2008.<sup>11</sup>  
44  
45  
46  
47  
48  
49

50  
51 Female genital cancers were grouped due to the small numbers of observed cancers in sub-groups in  
52 the Western Australian data and unstable SIR results. Statistically significant increases in observed  
53 genital (combined) cancers for female burn patients in both Western Australia and Scotland were  
54 found. The increased breast cancer incidence was statistically significant amongst female burn  
55 survivors in Scotland. Statistically significant increases in cancer incidence for combined gender for  
56  
57  
58  
59  
60

1  
2  
3 both Western Australia and Scottish data were observed for cancers of the buccal cavity, liver and  
4 respiratory tract. Refer to Table 3 for gender and site-specific cancer SIRs. For each of these cancers,  
5 female burn survivors in both Western Australia and Scotland had higher incidence than males when  
6 compared with respective general population data. For the majority of site-specific cancers selected,  
7 female burn survivors in both Western Australia and Scotland had higher numbers of observed  
8 cancers than expected, with SIRs of similar magnitude. However, SIR results for Scottish data  
9 reached statistical significance, reflecting the larger population-base and respective higher number  
10 of cancer notifications.

11  
12 Table 4 presents an SIR analyses of all-cause cancer risk repeated on age-restricted sub-cohorts,  
13 classified to reflect reproductive age (<15 years; 15-49 years; and, ≥50 years) at admission for burn  
14 injury. For males in both WA and Scotland, no statistically significant differences were found across  
15 the three age groups. For female burn survivors in Scotland, the observed numbers of cancers (all-  
16 cause) exceeded that expected for each of the three age groups, with statistically significant results  
17 observed for the age groups 15-49, and 50 years and older. In the Western Australia data, excess  
18 cancers were observed for those younger than 15 years and for those 50 years and older, with  
19 statistically significance reached for the older age group; for females 15-49 years at burn injury, no  
20 difference in observed and expected all-cause cancer was found.

## 31 4. Discussion

### 32 4.1 Methodological Issues

33  
34 Data linkage is a technique which creates links within and between data sources, identifying all the  
35 information that relates to the same person, place or event. In addition, when population-level  
36 administrative data are used, data linkage minimises issues of selection and reporting bias, as well as  
37 loss to follow-up. Data quality of the Western Australia and Scottish Cancer Registers<sup>15 17 18</sup> and  
38 hospital morbidity datasets<sup>22 23</sup> are assessed continually for both accuracy and quality; however,  
39 potential for misclassification bias may exist. The coding system changed from ICD-9 to ICD-10 in  
40 both Western Australia and Scotland during the study period for death and hospital admissions data.

41  
42 Data of all index burn hospitalisations in Western Australia and Scotland from 1983 to 2008 were  
43 analysed with follow-up time from discharge date, allowing for exclusion of prevalent cancers to  
44 support temporality of burn exposure and incident cancer. Cancer diagnoses from cancer registries  
45 in Western Australia and Scotland were independent of the record of burn injury in the respective  
46 hospital morbidity datasets. Minor burns treated in emergency departments were not included in  
47 the study. The burn patient cohorts under study are part of the respective reference populations,  
48 and as such, this may have a small diluting effect in the standardised incidence ratios. Western  
49  
50  
51  
52  
53  
54  
55  
56  
57  
58  
59  
60

1  
2  
3 Australia has a population of approximately 2.2 million, and as such, did not support detailed gender  
4 and site-specific cancer incidence assessments. Using parallel datasets from Scotland, of population  
5 approximately 5.5 million, allowed examination of the consistency of results and trends across the  
6 populations.  
7  
8

9  
10 The Western Australia hospital morbidity data records the principal diagnosis and up to 20  
11 additional diagnosis fields, whereas, the Scottish morbidity data includes the principal diagnosis and  
12 5 additional diagnosis fields. The effects of this reduction in the number of available additional  
13 diagnosis fields included the more frequent use in the Scottish data of ICD codes for burns to  
14 multiple regions of the body (ICD9 946; ICD10 T29) rather than recording of multiple individual  
15 anatomic burn sites, reflected in Table 1; and, an absence of consistently recorded supplementary  
16 ICD (ICD9 946; ICD10 T31) data to describe total body surface area burned (TBSA%). This limited our  
17 capacity to undertake both SIR analyses restricted to more severe burns of TBSA 20% or greater and  
18 incident rate ratio analysis to examine the effects of severity of burn injury (burn depth and TBSA%)  
19 using the least exposed group as reference (instead of the general population of Scotland) and  
20 confirm previous results. Approximately 90% of persons hospitalised in Western Australia had non-  
21 severe burn injury (TBSA<20%).<sup>14</sup> Previous SIR analyses of all-cause cancer risk in Western Australia  
22 showed similar trends in results for all burn patients (severe and non-severe) and those hospitalised  
23 for severe burn; however, for females hospitalised with severe burn there was a statistically  
24 significant increase of 31% in all-cause cancer notifications.<sup>11</sup>  
25  
26  
27  
28  
29  
30  
31  
32  
33

34  
35 The data analysed in this study are based on linked data from population registers to compare  
36 observed cancer incidence in burn patient cohorts with that expected using general population  
37 cancer rates adjusting for gender, age and calendar period population changes. Although this study  
38 had a follow-up period of up to 26 years from the date of separation for admission for burn injury,  
39 the follow up period for many patients may not have provided sufficient observation time to enable  
40 identification of all potential malignancies, given the long latency period for many cancers. Further  
41 burn injury research is planned with comparison cohorts (non-burn trauma, no injury), using  
42 incidence rate ratio analyses to explore injury and patient factors associated with the observed  
43 cancer risk.  
44  
45  
46  
47  
48

#### 49 **4.2 Findings**

50  
51  
52 Analysis of ISD Scotland data confirmed the results of our previous study: a statistically significant  
53 increase in all-cause cancer risk for female burn survivors with males experiencing no difference. The  
54 site specific analyses clearly showed statistically significant increases in the number of observed  
55 cancers for combined gender in both the Western Australia and Scottish data for the buccal cavity,  
56  
57  
58  
59  
60

1  
2  
3 larynx, liver, respiratory tract and oesophagus. There was also a general trend for increased cancer  
4 risk for most of the selected types of cancers for females and statistically significant increases in  
5 female genital cancers. Sub group analyses, defined crudely by reproductive age, did not elucidate  
6 any clear patterns of the influence of oestrogen on cancer incidence, with female burn survivors in  
7 Scotland showing increased risk across all age groups. For female burn survivors in WA, an increased  
8 risk for all-cause cancer was found for those younger than 15 years (pre-pubescent) and 50 years  
9 and older (post-menopausal).  
10

11  
12  
13  
14  
15 The site-specific analyses showed that whilst statistically significant increases in female genital  
16 cancers were found, there was also a general trend for increased cancer risk for most of the selected  
17 types of cancers for females. Statistically significant increases in the number of observed cancers for  
18 combined gender were found in both the Western Australia and Scottish data for the buccal cavity,  
19 larynx, liver, respiratory tract and oesophagus. These results are similar to those found in a Danish  
20 study<sup>24</sup> and may be related to tobacco or alcohol use amongst this patient population. However, it  
21 would be expected that inhalation injury may also increase the cancer risk of the upper and lower  
22 respiratory tract, and in the case of the diagnosis of hepatocellular cancer in a young male (12 years  
23 of age) burn patient in Western Australia,<sup>10</sup> tobacco or alcohol use would be most unlikely  
24 attributable agents. Interestingly, the results of no increase in skin melanoma risk after burn injury in  
25 this study support findings of other population-based studies.<sup>24 25</sup>  
26  
27

28  
29  
30  
31  
32  
33 An alternative explanation for this increased incidence in cancer post-burn may lie in the significant  
34 impact a burn injury has on the immune system, or the sustained oxidative and metabolic stress that  
35 are integral to the injury response. While burn injury predominantly affects the skin, it has been  
36 shown to cause significant depression of both humoral and cell-mediated immunity (CMI),<sup>7 26 27</sup>  
37 sustained elevated levels of oxidative stress<sup>28 29</sup> and prolonged elevation of hyper-metabolic and  
38 stress hormone levels.<sup>30 31</sup> These effects have been demonstrated to persist for up to 3 years post-  
39 injury and can lead to long-term systemic impacts on other organs of the body.<sup>1 2 32-36</sup> Severe burn  
40 injury has been demonstrated to induce endoplasmic reticulum (ER) stress, in particular, in the  
41 liver.<sup>37</sup> ER stress is a stress-response that initially facilitates cell survival but can switch to a pro-  
42 apoptotic signal with prolonged stress.<sup>37 38</sup> However, it has also been shown that the ER stress  
43 response can become maladaptive, facilitating adaptation to hypoxic environments and promoting  
44 tumour growth.<sup>38 39</sup> It is plausible that the array of host responses combined with the impact of the  
45 injury, therefore, creates an environment of increased susceptibility to cancer.  
46  
47  
48  
49  
50  
51  
52  
53

54  
55 In addition to the observed increase in some of the selected site-specific cancers, the data support  
56 evidence for a gender dimorphism (a systematic difference between individuals of different sex in  
57 the same species) in the response to burn injury. After burn injury, gender has been shown to be an  
58  
59  
60

1  
2  
3 important factor with respect to poorer outcomes for mortality<sup>40-43</sup> and improved prognosis for  
4 multiple organ dysfunction syndrome,<sup>44</sup> and sepsis,<sup>45</sup> for females compared to males. Similar gender-  
5 based differences have also been reported in animal studies of burn injury.<sup>46-50</sup>  
6  
7

8 The impact of gender with respect to outcomes after burn injury is largely thought to stem from  
9 well-established differences in immune biology. There is a substantial volume of published literature  
10 to support a gender dimorphism in the immune response<sup>51-54</sup> and sepsis<sup>45</sup> following injury that have  
11 impacts on health and mortality.<sup>41 42</sup> The majority of these studies support a more efficient and  
12 effective innate and adaptive immune responses in females, leading to more rapid clearance of  
13 infectious organisms driven by tissue resident cell populations.<sup>55</sup> This 'advantageous' response  
14 reduces the risk of infection in females compared to males<sup>55 56</sup> but leads to elevated risk of  
15 autoimmune disease.<sup>57</sup> This dimorphism was thought to arise largely due to the impact of oestrogen  
16 on immune function.<sup>58 59</sup> However, recent papers have demonstrated these differences are not  
17 completely ablated by ovariectomy (in animal models)<sup>55</sup> and others have shown that oestrogen can  
18 be deleterious to the immune response.<sup>60</sup> This suggests a role of other mediators, most likely  
19 expressed on the X-chromosome, in the maintenance of the differential immune response.<sup>61 62</sup> The  
20 evidence for gender differences in the immune response, both to thermal and other trauma, and its  
21 impact on outcomes is substantial. Here, the evidence of increased cancer incidence in selected  
22 types of cancer after burn injury, with a greater effect in females, suggests the systemic immune  
23 response to burn injury may be a mediator of cancer susceptibility.  
24  
25  
26  
27  
28  
29  
30  
31  
32  
33

### 34 35 **5. Conclusion**

36 Using population-based linked data of all burn patients in both Western Australia and Scotland,  
37 consistent trends were found in excesses in cancer notifications for a range of selected site specific  
38 cancers with an elevated and more widespread increase in female burn patients. Overall, however,  
39 the increased cancer risk affected small proportions of the respective burn patient cohorts. More  
40 research is required to understand the underlying mechanism(s) that may link burn injury to an  
41 increased risk of some cancers and why this is elevated in females, which may in turn enable  
42 identification of possible sites for intervention.  
43  
44  
45  
46  
47  
48  
49  
50  
51  
52  
53  
54  
55  
56  
57  
58  
59  
60

### Acknowledgements

The authors thank the staff of both the Health Information Linkage Branch for access to the Western Australian Data Linkage System and Scottish Record Linkage team for their assistance in obtaining the data and providing advice on aspects of coding. Furthermore, the authors would like to thank the WA Health Data Custodians for access to the core health datasets and both the Western Australian Department of Health and ISD Scotland for their assistance and advice. Project data costs were supported by an Australian National Health and Medical Research Council research grant and a Raine Medical Research Foundation Priming grant. J.M.D Senior Research Fellowship is supported by Woodside corporate sponsorship via the Fiona Wood Foundation.

For peer review only



**Table 1** Characteristics of burn injury patients included in analyses with no record of cancer prior to separation date of index burn admission, 1983-2008, by country.

| Characteristics                       | Western Australia<br>N (%) | Scotland<br>N (%) |
|---------------------------------------|----------------------------|-------------------|
| <b>Total number burn admissions*</b>  | 22,705                     | 37,506            |
| <b>Gender: Male</b>                   | 15,481 (68.2)              | 23,896 (63.7)     |
| <b>Age at index admission (Years)</b> |                            |                   |
| <15                                   | 8,135 (35.8)               | 14,579 (38.9)     |
| 15-24                                 | 4,364 (19.2)               | 4,495 (12.0)      |
| 25-49                                 | 7,147 (31.5)               | 9,554 (25.5)      |
| 50-64                                 | 1,736 (7.7)                | 4,080 (10.9)      |
| 65+                                   | 1,323 (5.8)                | 4,798 (12.8)      |
| <b>Site of burn**</b>                 |                            |                   |
| Head and neck                         | 6,784 (15.4)               | 7,592 (16.1)      |
| Trunk                                 | 7,553 (17.2)               | 8,815 (21.0)      |
| Hand, wrist, upper limb               | 15,801 (35.9)              | 6,984 (14.8)      |
| Hip, lower limb                       | 11,798 (26.8)              | 9,531 (3.4)       |
| Eye                                   | 379 (0.9)                  | 1,087 (2.3)       |
| Respiratory tract                     | 212 (0.5)                  | 163 (0.3)         |
| Other internal organs                 | 124 (0.3)                  | 165 (0.3)         |
| Multiple regions                      | 656 (1.5)                  | 3,677 (7.8)       |
| Unspecified region                    | 694 (1.6)                  | 858 (1.8)         |
| <b>Burn site depth**</b>              |                            |                   |
| Erythema                              | 8,929 (20.9)               | 4,815 (11.5)      |
| Partial thickness                     | 18,449 (41.9)              | 6,302 (15.0)      |
| Full thickness                        | 7,095 (16.1)               | 4,924 (11.7)      |
| Unspecified                           | 9,528 (21.7)               | 25,869 (61.7)     |
| <b>Calendar period of admission</b>   |                            |                   |
| 1983-1988                             | 5,431 (23.9)               | 11,507 (30.7)     |
| 1989-1993                             | 4,200 (18.5)               | 7,876 (21.0)      |
| 1994-1998                             | 4,755 (20.9)               | 7,130 (19.0)      |
| 1999-2003                             | 4,265 (18.9)               | 5,980 (15.9)      |
| 2004-2008                             | 4,054 (17.9)               | 5,013 (13.4)      |
| <b>Any co-morbidity at index burn</b> |                            |                   |
| <b>Yes</b>                            | 2,798 (12.3)               | 7,679 (20.5)      |

\* No previous record of cancer

\*\* Patients may have multiple burn sites per anatomical region per depth



**Table 2** Standardised incidence ratios and 95% confidence intervals and observed and expected numbers for all-cause cancer in persons hospitalised for burn injury in Western Australia and Scotland, during the periods 1983-2008 and 1983-1988.

|                                   | Western Australia <sup>††</sup> |                                       |                                         | Scotland                            |                                       |                                         |
|-----------------------------------|---------------------------------|---------------------------------------|-----------------------------------------|-------------------------------------|---------------------------------------|-----------------------------------------|
|                                   | Combined<br>SIR 95%CI*<br>O:E** | Male <sup>†</sup><br>SIR 95%CI<br>O:E | Female <sup>†</sup><br>SIR 95%CI<br>O:E | Combined<br>SIR 95%CI<br>O:E        | Male <sup>†</sup><br>SIR 95%CI<br>O:E | Female <sup>†</sup><br>SIR 95%CI<br>O:E |
| <b>Total cohort<br/>1983-2008</b> | 0.97 (0.9 to 1.0)<br>759: 785.5 | 0.9 (0.8 to 1.0)<br>515: 569.5        | 1.1 (1.0 to 1.3)<br>244: 216.0          | 1.09 (1.05 to 1.10)<br>2260: 2075.9 | 0.96 (0.90 to 1.0)<br>1249: 1303.2    | 1.3 (1.2 to 1.4)<br>1011: 772.6         |
| <b>Sub-cohort<br/>1983-1988</b>   | 1.0 (0.9 to 1.1)<br>294:294.9   | 0.9 (0.8 to 1.0)<br>190:220.3         | 1.4 (1.1 to 1.7)<br>104: 74.6           | 0.9 (0.8 to 0.9)<br>838: 953.4      | 0.8 (0.7 to 0.9)<br>491: 614.3        | 1.0 (0.9 to 1.2)<br>347: 339.1          |

\*SIR (95%CI): Standardised Incidence Ratio (95% confidence interval) adjusted for age and gender

\*\* O: E: Observed: Expected

<sup>†</sup>SIR (95%CI): Standardised Incidence Ratio (95% confidence interval) adjusted for age

<sup>††</sup> Western Australian comparison data Duke et al. Burns 2011; 38:340-47.

**Table 3** Standardised incidence ratios and 95% confidence intervals and observed and expected numbers for selected types of cancer in persons hospitalised for burns Western Australia and Scotland, 1983-2008.

| Cancer Site                                       | Western Australia             |                                |                              | Scotland                       |                                |                                |
|---------------------------------------------------|-------------------------------|--------------------------------|------------------------------|--------------------------------|--------------------------------|--------------------------------|
|                                                   | Combined SIR 95%CI*<br>O:E**  | Male SIR 95%CI†<br>O:E         | Female SIR 95%CI†<br>O:E     | Combined SIR 95%CI*<br>O:E     | Male SIR 95%CI†<br>O:E         | Female SIR 95%CI†<br>O:E       |
| <b>Buccal cavity C00 to C14</b>                   | 1.4 (1.03 to 1.9)<br>45: 32.6 | 1.4 (1.0 to 1.9)<br>38:28.1    | 1.5 (0.7 to 3.2)<br>7: 4.6   | 2.6 (2.2 to 3.1)<br>117: 45.0  | 2.4 (1.9 to 2.9)<br>83: 35.1   | 3.4 (2.5 to 4.8)<br>34:9.9     |
| <b>Oesophagus C15</b>                             | 1.4 (0.9 to 2.4)<br>15:10.50  | 1.5 (0.9 to 2.6)<br>13: 8.7    | 1.1 (0.3 to 4.5)<br>2: 1.8   | 1.6 (1.3 to 2.0)<br>82: 51.4   | 1.5 (1.1 to 1.9)<br>53:36.1    | 1.9 (1.3 to 2.7)<br>29:15.3    |
| <b>Stomach C16</b>                                | 0.6 (0.3 to 1.1)<br>10:17.0   | 0.5 (0.2 to 1.1)<br>7: 13.4    | 0.8 (0.3 to 2.6)<br>3: 3.6   | 1.2 (0.9 to 1.5)<br>73:63.2    | 1.1 (0.8 to 1.5)<br>1.2 5: 2.8 | 1.3 (0.9 to 1.9)<br>25:19.5    |
| <b>Colorectal C18 to C20</b>                      | 0.7 (0.6 to 0.9)<br>69: 96.3  | 0.7 (0.5 to 0.9)<br>45: 69.1   | 0.9 (0.6 to 1.3)<br>24: 27.2 | 1.2 (1.1 to 1.4)<br>268:221.8  | 1.0 (0.9 to 1.2)<br>142:140.5  | 1.4 (1.3 to 1.8)<br>125: 81.3  |
| <b>Liver C22</b>                                  | 2.6 (1.6 to 4.0)<br>19: 7.4   | 2.2 (1.3 to 3.7)<br>14: 6.3    | 4.7 (2.0 to 11.4)<br>5: 1.1  | 1.7 (1.2 to 2.5)<br>31:18.0    | 1.5 (1.1 to 2.5)<br>22: 13.3   | 1.9 (1.0 to 3.7)<br>9: 4.7     |
| <b>Pancreas C25</b>                               | 0.7 (0.4 to 1.3)<br>11: 15.3  | 0.9 (0.5 to 1.7)<br>9: 10.4    | 0.4 (0.1 to 1.6)<br>2: 5.0   | 1.1 (0.8 to 1.5)<br>44:39.6    | 1.5 (1.03 to 2.0)<br>34: 23.4  | 0.6 (0.3 to 1.2)<br>10: 16.2   |
| <b>Larynx C32</b>                                 | 5.7 (0.9 to 3.3)<br>10: 5.7   | 1.5 (0.7 to 3.0)<br>8: 5.4     | 6.0 (1.5 to 24.1)<br>2: 0.3  | 1.9 (1.4 to 2.5)<br>39: 21.1   | 1.5 (1.1 to 2.2)<br>28: 18.5   | 4.2(2.3 to 7.7)<br>11:2.6      |
| <b>Respiratory tract C33 to C34</b>               | 1.4 (1.1 to 1.6)<br>101: 74.8 | 1.3 (1.1 to 1.7)<br>79:59.3    | 1.4 (0.9 to 2.2)<br>22:15.4  | 1.5 (1.4 to 1.7)<br>448:298.1  | 1.3 (1.2 to 1.5)<br>279:210.4  | 1.9 (1.7 to 2.2)<br>169:87.7   |
| <b>Skin –melanoma C44</b>                         | 0.7 (0.6 to 0.9)<br>72: 102.0 | 0.7 (0.6 to 1.0)<br>57: 77.9   | 0.6 (0.4 to 1.0)<br>15: 24.1 | 0.8 (0.6 to 1.1)<br>38:48.5    | 0.7 (0.4 to 1.1)<br>19:28.4    | 1.0 (0.4 to 1.1)<br>19:20.0    |
| <b>Breast C50</b>                                 | 1.0 (0.8 to 1.3)<br>65: 62.4  | 1.3 (0.2 to 9.2)<br>1: 0.8     | 1.0 (0.8 to 1.3)<br>64:61.7  | 1.7 (1.5 to 1.9)<br>271:161.4  | 0.7 (0.1 to 4.8)<br>1:1.5      | 1.6 (1.5 to 1.9)<br>270: 160.0 |
| <b>Female genital tract (combined) C51 to C57</b> |                               |                                | 1.4 (1.0 to 2.0)<br>31:26.7  |                                |                                | 1.7 (1.4 to 2.0)<br>114: 67.2  |
| <b>Male genital tract (combined) C60 to C63</b>   |                               | 0.9 (0.8 to 1.1)<br>141: 150.7 |                              |                                | 1.1 (1.0 to 1.3)<br>210: 192.6 |                                |
| <b>Prostate C61</b>                               |                               | 0.8 (0.6 to 0.9)<br>102: 135.9 |                              |                                | 1.1 (0.9 to 1.2)<br>177: 165.5 |                                |
| <b>Kidney, Bladder, UT C64 to C68</b>             | 0.5 (0.3 to 0.7)<br>17: 37.9  | 0.4 (0.2 to 0.7)<br>12: 30.9   | 0.7 (0.3 to 1.7)<br>5: 7.0   | 1.2 (1.0 to 1.4)<br>135: 110.9 | 1.2 (1.0 to 1.4)<br>96: 82.8   | 1.4 (1.0 to 1.9)<br>39: 28.0   |
| <b>Brain C71</b>                                  | 1.2 (0.7 to 1.9)<br>16: 13.9  | 1.0 (0.5 to 1.8)<br>10: 10.5   | 1.7 (0.8 to 3.9)<br>6: 3.5   | 1.5 (1.1 to 2.0)<br>39:27.0    | 1.4 (0.9 to 2.0)<br>26:19.2    | 1.7 (1.0 to 2.9)<br>13:7.8     |
| <b>Lymphomas to all</b>                           | 1.0 (0.7 to 1.4)<br>36: 35.5  | 0.8 (0.5 to 1.2)<br>20: 26.0   | 1.7 (1.03 to 2.7)<br>16:9.6  | 1.1 (0.9 to 1.4)<br>75:68.0    | 1.1 (0.8 to 1.4)<br>48:45.0    | 1.2 (0.8 to 1.7)<br>27:23.0    |
| <b>Myeloma/ plasma</b>                            | 1.3 (0.7 to 2.3)<br>11: 8.6   | 1.3 (0.7 to 2.6)<br>8:6.1      | 1.2 (0.4 to 3.7)<br>3: 2.49  | 1.1 (0.7 to 1.6)<br>22:21.0    | 1.0 (0.6 to 1.7)<br>13:13.2    | 1.2 (0.6 to 2.2)<br>9: 7.8     |
| <b>Leukaemia's to all</b>                         | 1.1 (0.8 to 1.7)<br>26: 22.9  | 1.1 (0.7 to 1.8)<br>19: 17.0   | 1.2 (0.6 to 2.5)<br>7: 6.0   | 1.3 (1.01 to 1.7)<br>63:48.6   | 1.0 (0.73 to 1.4)<br>34:33.1   | 1.8 (1.3 to 2.7)<br>29: 15.5   |

\*SIR (95%CI): Standardised Incidence Ratio adjusted for age and gender (95% confidence interval)

\*\* O: E: Observed: Expected

†SIR (95%CI): Standardised Incidence Ratio adjusted for age (95% confidence interval)

**Table 4** Standardised incidence ratios and 95% confidence intervals and observed and expected numbers for all-cause cancer incidence, for persons hospitalised for burns Western Australia and Scotland, by age group, 1983 to 1988.

| Age at first burn years | SIR (95%CI)<br>(observed: expected)  |                                      |                                      |
|-------------------------|--------------------------------------|--------------------------------------|--------------------------------------|
|                         | combined gender*                     | Male†                                | Female†                              |
| <b>&lt;15</b>           |                                      |                                      |                                      |
| <b>WA</b>               | 1.17 (0.82 to 1.68)<br>(30:25)       | 1.19 (0.77 to 1.84)<br>(20:16)       | 1.15 (0.62 to 2.14)<br>(10:8.6)      |
| <b>Scotland</b>         | 0.94 (0.69 to 1.28)<br>(41:43.69)    | 0.72 (0.47 to 1.12)<br>(20:27.77)    | 1.32 (0.86 to 2.02)<br>(21:15.92)    |
| <b>15 to 49</b>         |                                      |                                      |                                      |
| <b>WA</b>               | 0.87 (0.77 to 0.99)<br>(273: 313)    | 0.87 (0.75 to 1.00)<br>(197: 226)    | 0.86 (0.69 to 1.1)<br>(76: 87)       |
| <b>Scotland</b>         | 1.21 (1.12 to 1.31)<br>(617: 509.16) | 1.04 (0.94 to 1.16)<br>(345: 331.68) | 1.53 (1.36 to 1.73)<br>(272: 177.48) |
| <b>≥ 50</b>             |                                      |                                      |                                      |
| <b>WA</b>               | 1.02 (0.93 to 1.12)<br>(456: 446)    | 0.91 (0.82 to 1.02)<br>(298: 326)    | 1.32 (1.13 to 1.54)<br>(158: 120)    |
| <b>Scotland</b>         | 1.05 (1.00 to 1.11)<br>(1602: 1523)  | 0.94 (0.88 to 1.00)<br>(884: 943.75) | 1.23 (1.15 to 1.33)<br>(718:579.25)  |

\*SIR (95%CI): Standardised Incidence Ratio adjusted for age and gender (95% confidence interval)

†SIR (95%CI): Standardised Incidence Ratio adjusted for age (95% confidence interval)

## References

1. Anderson JR, Zorbas JS, Phillips JK, Harrison JL, Dawson LF, Bolt SE, et al. Systemic decreases in cutaneous innervation after burn injury. *J Invest Dermatol* 2010;130(7):1948-51.
2. Jeschke MG, Gauglitz GG, Kulp GA, Finnerty CC, Williams FN, Kraft R, et al. Long-term persistence of the pathophysiologic response to severe burn injury. *PLoS ONE [Electronic Resource]* 2011;6(7):e21245.
3. Rea S, Giles NL, Webb S, Adcroft KF, Evill LM, Strickland DH, et al. Bone marrow-derived cells in the healing burn wound--more than just inflammation. *Burns* 2009;35(3):356-64.
4. Deveci M, Sengezer M, Bozkurt M, Eski M, Inal A. Comparison of lymphocyte populations in cutaneous and electrical burn patients: a clinical study. *Burns* 2000;26(3):229-32.
5. Heideman M, Bengtsson A. The immunologic response to thermal injury. *World J Surg* 1992;16(1):53-6.
6. McGill SN, Cartotto RC. Herpes simplex virus infection in a paediatric burn patient: case report and review. *Burns* 2000;26(2):194-9.
7. O'Sullivan ST, O'Connor TP. Immunosuppression following thermal injury: the pathogenesis of immunodysfunction. *Br J Plast Surg* 1997;50(8):615-23.
8. Sjoberg T, Mzezewa S, Jonsson K, Salemark L. Immune response in burn patients in relation to HIV infection and sepsis. *Burns* 2004;30(7):670-4.
9. Jeschke MG, Barrow RE, Herndon DN. Extended hypermetabolic response of the liver in severely burned pediatric patients. *Arch Surg* 2004;139(6):641-7.
10. Harper A, Rea S, Wood F. Hepatocellular carcinoma in a young survivor of major burns. *Burns* 2008;34(4):572-4.
11. Duke J, Rea S, Semmens J, Edgar D, Wood F. Burn Injury and cancer risk: A state-wide longitudinal study. *Burns* 2011;38:340-47.
12. Holman CDJ, Bass AJ, Rouse IL, Hobbs MST. Population-based linkage of health records in Western Australia: development of a health service research linked database. *Aust N Z J Public Health* 1999;23(5):453-59.
13. Kendrick S, Clarke J. The Scottish Record Linkage System. *Health Bull* 1993;51(2):72-9.
14. Duke J, Wood F, Semmens J, Spilsbury K, Edgar DW, Hendrie D, et al. A 26-year population-based study of burn injury hospital admissions in Western Australia. *J Burn Care Res* 2011;32(3):379-86.
15. Threlfall T, Thompson JR. Cancer incidence and mortality in Western Australia, 2008. Statistical Series Number 87. Perth: Department of Health, Western Australia, 2010.
16. ISD Scotland. ISD Scotland, better information, better decisions, better health, 2010.
17. Brewster DH, Stockton D, Harvey J, Mackay M. Reliability of cancer registration data in Scotland, 1997. *Eur J Cancer* 2002;38(3):414-7.
18. Brewster DH, Stockton DL. Ascertainment of breast cancer by the Scottish Cancer Registry: an assessment based on comparison with five independent breast cancer trials databases. *Breast* 2008;17(1):104-6.
19. Gordis L. *Epidemiology* Second ed. Philadelphia: W.B. Saunders Company, 2000.
20. Verkasalo PK, Pukkala E, Kaprio J, Heikkila KV, Koskenvuo M. Magnetic fields of high voltage power lines and risk of cancer in Finnish adults: nationwide cohort study. *BMJ* 1996;313(7064):1047-51.
21. Bailar III J, Ederer F. Significance Factors for the Ratio of a Poisson Variable to Its Expectation. *Biometrics* 1964;20:639-43.
22. ISD Scotland. Assessment of SMR01 Data 2010-2011 Scotland Report May 2012. Edinburgh: NHS National Services Scotland, 2012.
23. Department of Health Western Australia. Clinical Information Audit Program - Hospital Activity Report. *Operational Directive OD 0201/09*. Perth Department of Health WA, 2009.
24. Mellemkjaer L, Holmich LR, Gridley G, Rabkin C, Olsen JH. Risks for skin and other cancers up to 25 years after burn injuries. *Epidemiology* 2006;17(6):668-73.

- 1
- 2
- 3 25. Lindelof B, Krynitz B, Granath F, Ekbohm A. Burn injuries and skin cancer: a population-based
- 4 cohort study. *Acta Derm Venereol* 2008;88(1):20-2.
- 5 26. Horgan PG, Mannick JA, Dubravec DB, Rodrick ML. Effect of low dose recombinant interleukin 2
- 6 plus indomethacin on mortality after sepsis in a murine burn model. *Br J Surg*
- 7 1990;77(4):401-4.
- 8 27. Schmand JF, Ayala A, Chaudry IH. Effects of trauma, duration of hypotension, and resuscitation
- 9 regimen on cellular immunity after hemorrhagic shock. *Crit Care Med* 1994;22(7):1076-83.
- 10 28. Liu D-m, Sun B-w, Sun Z-w, Jin Q, Sun Y, Chen X. Suppression of inflammatory cytokine
- 11 production and oxidative stress by CO-releasing molecules-liberated CO in the small
- 12 intestine of thermally-injured mice. *Zhongguo Yao Li Xue Bao/Acta Pharmacologica Sinica*
- 13 2008;29(7):838-46.
- 14 29. Shupp JW, Nasabzadeh TJ, Rosenthal DS, Jordan MH, Fidler P, Jeng JC. A review of the local
- 15 pathophysiologic bases of burn wound progression. *J Burn Care Res* 2010;31(6):849-73.
- 16 30. Atiyeh BS, Gunn SWA, Dibo SA. Metabolic implications of severe burn injuries and their
- 17 management: a systematic review of the literature. *World J Surg* 2008;32(8):1857-69.
- 18 31. Williams FN, Herndon DN, Jeschke MG. The hypermetabolic response to burn injury and
- 19 interventions to modify this response. *Clin Plast Surg* 2009;36(4):583-96.
- 20 32. Ananthakrishnan P, Cohen DB, Xu DZ, Lu Q, Feketeova E, Deitch EA. Sex hormones modulate
- 21 distant organ injury in both a trauma/hemorrhagic shock model and a burn model. *Surgery*
- 22 2005;137(1):56-65.
- 23 33. Dreschsler S, Weixelbaumer K, Raeven P, Jafarmadar M, Khadam A, van Griensven M, et al.
- 24 Relationship between Age/Gender-Induced Survival Changes and the Magnitude of
- 25 Inflammatory Activation and Organ Dysfunction in Post-Traumatic Sepsis. *PLoS ONE*
- 26 *[Electronic Resource]* 2012;7(12):e5147.
- 27 34. Borue X, Lee S, Grove J, Herzog EL, Harris R, Diflo T, et al. Bone marrow-derived cells contribute
- 28 to epithelial engraftment during wound healing. *Am J Pathol* 2004;165(5):1767-72.
- 29 35. Fan Q, Yee CL, Ohyama M, Tock C, Zhang G, Darling TN, et al. Bone marrow-derived keratinocytes
- 30 are not detected in normal skin and only rarely detected in wounded skin in two different
- 31 murine models. *Exp Hematol* 2006;34(5):672-9.
- 32 36. Harris RG, Herzog EL, Bruscia EM, Grove JE, Van Arnam JS, Krause DS. Lack of a fusion
- 33 requirement for development of bone marrow-derived epithelia. *Science*
- 34 2004;305(5680):90-3.
- 35 37. Jeschke MG, Finnerty CC, Herndon DN, Song J, Boehning D, Tompkins RG, et al. Severe injury is
- 36 associated with insulin resistance, endoplasmic reticulum stress response, and unfolded
- 37 protein response. *Ann Surg* 2012;255(2):370-8.
- 38 38. Verfaillie T, Garg AD, Agostinis P. Targeting ER stress induced apoptosis and inflammation in
- 39 cancer. *Cancer Lett* 2013;332(2):249-64.
- 40 39. Wang S, Kaufman RJ. The impact of the unfolded protein response on human disease. *Journal of*
- 41 *Cell Biology* 2012;197(7):857-67.
- 42 40. George RL, McGwin G, Jr., Schwacha MG, Metzger J, Cross JM, Chaudry IH, et al. The association
- 43 between sex and mortality among burn patients as modified by age. *J Burn Care Rehabil*
- 44 2005;26(5):416-21.
- 45 41. Kerby JD, McGwin G, Jr., George RL, Cross JA, Chaudry IH, Rue LW, 3rd, et al. Sex differences in
- 46 mortality after burn injury: results of analysis of the National Burn Repository of the
- 47 American Burn Association. *J Burn Care Res* 2006;27(4):452-6.
- 48 42. McGwin G, Jr., George RL, Cross JM, Reiff DA, Chaudry IH, Rue LW, 3rd. Gender differences in
- 49 mortality following burn injury. *Shock* 2002;18(4):311-5.
- 50 43. O'Keefe GE, Hunt JL, Purdue GF. An evaluation of risk factors for mortality after burn trauma and
- 51 the identification of gender-dependent differences in outcomes. *J Am Coll Surg*
- 52 2001;192(2):153-60.
- 53
- 54
- 55
- 56
- 57
- 58
- 59
- 60

- 1
- 2
- 3 44. Frink M, Pape H-C, van Griensven M, Krettek C, Chaudry IH, Hildebrand F. Influence of sex and
- 4 age on mods and cytokines after multiple injuries. *Shock* 2007;27(2):151-6.
- 5 45. Schroder J, Kahlke V, Book M, Stuber F. Gender differences in sepsis: genetically determined?
- 6 *Shock* 2000;14(3):307-10
- 7 46. Gregory MS, Duffner LA, Faunce DE, Kovacs EJ. Estrogen mediates the sex difference in post-burn
- 8 immunosuppression. *J Endocrinol* 2000;164(2):129-38.
- 9 47. Gregory MS, Faunce DE, Duffner LA, Kovacs EJ. Gender difference in cell-mediated immunity
- 10 after thermal injury is mediated, in part, by elevated levels of interleukin-6. *J Leukoc Biol*
- 11 2000;67(3):319-26.
- 12 48. Kahlke V, Angele MK, Ayala A, Schwacha MG, Cioffi WG, Bland KI, et al. Immune dysfunction
- 13 following trauma-haemorrhage: influence of gender and age. *Cytokine* 2000;12(1):69-77.
- 14 49. Kahlke V, Angele MK, Schwacha MG, Ayala A, Cioffi WG, Bland KI, et al. Reversal of sexual
- 15 dimorphism in splenic T lymphocyte responses after trauma-hemorrhage with aging. *Am J*
- 16 *Physiol Cell Physiol* 2000;278(3):C509-16.
- 17 50. Plackett TP, Gamelli RL, Kovacs EJ. Gender-based differences in cytokine production after burn
- 18 injury: a role of interleukin-6. *J Am Coll Surg* 2010;210(1):73-8.
- 19 51. Croce MA, Fabian TC, Malhotra AK, Bee TK, Miller PR. Does gender difference influence
- 20 outcome? *J Trauma* 2002;53(5):889-94.
- 21 52. Horton JW, White DJ, Maass DL. Gender-related differences in myocardial inflammatory and
- 22 contractile responses to major burn trauma. *Am J Physiol Heart Circ Physiol*
- 23 2004;286(1):H202-13.
- 24 53. Mace JE, Park MS, Mora AG, Chung KK, Martini W, White CE, et al. Differential expression of the
- 25 immunoinflammatory response in trauma patients: burn vs. non-burn. *Burns*
- 26 2012;38(4):599-606.
- 27 54. Verthelyi D. Sex hormones as immunomodulators in health and disease. *Int Immunopharmacol*
- 28 2001;1(6):983-93.
- 29 55. Scotland RS, Stables MJ, Madalli S, Watson P, Gilroy DW. Sex differences in resident immune cell
- 30 phenotype underlie more efficient acute inflammatory responses in female mice. *Blood*
- 31 2011;118(22):5918-27.
- 32 56. Sperry JL, Nathens AB, Frankel HL, Vanek SL, Moore EE, Maier RV, et al. Characterization of the
- 33 gender dimorphism after injury and hemorrhagic shock: are hormonal differences
- 34 responsible? *Critical Care Medicine* 2008;36(6):1838-45.
- 35 57. Ozelik T. X chromosome inactivation and female predisposition to autoimmunity. *Clin Rev*
- 36 *Allergy Immunol* 2008;34(3):348-51.
- 37 58. Nicol T, Vernon-Roberts B, Quantock DC. Effect of orchidectomy and ovariectomy on survival
- 38 against lethal infections in mice. *Nature* 1966;211(5053):1091-2.
- 39 59. Paavonen T. Hormonal regulation of immune responses. *Ann Med* 1994;26(4):255-8.
- 40 60. Rettew JA, Huet YM, Marriott I. Estrogens augment cell surface TLR4 expression on murine
- 41 macrophages and regulate sepsis susceptibility in vivo. *Endocrinology* 2009;150(8):3877-84.
- 42 61. Libert C, Dejager L, Pinheiro I. The X chromosome in immune functions: when a chromosome
- 43 makes the difference. *Nat Rev Immunol* 2010;10(8):594-604.
- 44 62. Pinheiro I, Dejager L, Libert C. X-chromosome-located microRNAs in immunity: might they
- 45 explain male/female differences? The X chromosome-genomic context may affect X-located
- 46 miRNAs and downstream signaling, thereby contributing to the enhanced immune response
- 47 of females. *Bioessays* 2011;33(11):791-802.
- 48
- 49
- 50
- 51
- 52
- 53
- 54
- 55
- 56
- 57
- 58
- 59
- 60



STROBE Statement—checklist of items that should be included in reports of observational studies

*Page numbers in this checklist – relate to page numbers of the final pdf version of uploaded manuscript file*

|                           | Item No | Recommendation                                                                                                                                                                                                                                                                                                                                                                                                                                                                                                                                                                                                                                                                                                                                                                                                                          |
|---------------------------|---------|-----------------------------------------------------------------------------------------------------------------------------------------------------------------------------------------------------------------------------------------------------------------------------------------------------------------------------------------------------------------------------------------------------------------------------------------------------------------------------------------------------------------------------------------------------------------------------------------------------------------------------------------------------------------------------------------------------------------------------------------------------------------------------------------------------------------------------------------|
| <b>Title and abstract</b> | 1       | <p>(a) Indicate the study's design with a commonly used term in the title or the abstract<br/><i>Population-based retrospective cohort record linkage study – in abstract</i><br/><i>Title: Burn injury, gender and cancer risk: population-based cohort study using data from Scotland and Western Australia. (Pages 1, 5)</i></p> <p>(b) Provide in the abstract an informative and balanced summary of what was done and what was found<br/><i>Abstract - Page 5</i></p>                                                                                                                                                                                                                                                                                                                                                             |
| <b>Introduction</b>       |         |                                                                                                                                                                                                                                                                                                                                                                                                                                                                                                                                                                                                                                                                                                                                                                                                                                         |
| Background/rationale      | 2       | <p>Explain the scientific background and rationale for the investigation being reported<br/><i>While burns predominantly affect the skin, burns are associated with significant systemic effects, depressed immune functioning and prolonged periods of systemic catabolism and hypermetabolism, that may increase a person's risk of cancer. (Page 6)</i></p>                                                                                                                                                                                                                                                                                                                                                                                                                                                                          |
| Objectives                | 3       | <p>State specific objectives, including any prespecified hypotheses<br/><i>Done: Firstly, confirm the increased risk of 'all-cause' cancer observed in the preliminary Western Australian study of female burn survivors using the Scottish data; and, secondly, examine site-specific cancer risk amongst survivors of burn injury (Page 6)</i></p>                                                                                                                                                                                                                                                                                                                                                                                                                                                                                    |
| <b>Methods</b>            |         |                                                                                                                                                                                                                                                                                                                                                                                                                                                                                                                                                                                                                                                                                                                                                                                                                                         |
| Study design              | 4       | <p>Present key elements of study design early in the paper<br/><i>Clearly presented in Introduction and Methods sections (Pages 5- 8)</i></p>                                                                                                                                                                                                                                                                                                                                                                                                                                                                                                                                                                                                                                                                                           |
| Setting                   | 5       | <p>Describe the setting, locations, and relevant dates, including periods of recruitment, exposure, follow-up, and data collection<br/><i>Clearly presented in Methods section (Pages 6 - 8)</i></p>                                                                                                                                                                                                                                                                                                                                                                                                                                                                                                                                                                                                                                    |
| Participants              | 6       | <p>(a) <i>Cohort study</i>—Give the eligibility criteria, and the sources and methods of selection of participants. Describe methods of follow-up<br/><i>Population-based study of linked health administrative datasets: whole of population data are used. (Pages 6-8)</i></p> <p><i>Case-control study</i>—Give the eligibility criteria, and the sources and methods of case ascertainment and control selection. Give the rationale for the choice of cases and controls<br/><i>Cross-sectional study</i>—Give the eligibility criteria, and the sources and methods of selection of participants</p> <p>(b) <i>Cohort study</i>—For matched studies, give matching criteria and number of exposed and unexposed<br/><i>Case-control study</i>—For matched studies, give matching criteria and the number of controls per case</p> |
| Variables                 | 7       | <p>Clearly define all outcomes, exposures, predictors, potential confounders, and effect modifiers. Give diagnostic criteria, if applicable<br/><i>Burn exposure (Page 7) and cancer outcomes (Page 8) clearly defined.</i></p>                                                                                                                                                                                                                                                                                                                                                                                                                                                                                                                                                                                                         |

|                                                                                                                                  |                              |     |                                                                                                                                                                                                                                                                                                                                                                                                                                                                                                                                                                                                                                                                                                                                                                                                                                                                                                                                                                                                                                                                                                               |
|----------------------------------------------------------------------------------------------------------------------------------|------------------------------|-----|---------------------------------------------------------------------------------------------------------------------------------------------------------------------------------------------------------------------------------------------------------------------------------------------------------------------------------------------------------------------------------------------------------------------------------------------------------------------------------------------------------------------------------------------------------------------------------------------------------------------------------------------------------------------------------------------------------------------------------------------------------------------------------------------------------------------------------------------------------------------------------------------------------------------------------------------------------------------------------------------------------------------------------------------------------------------------------------------------------------|
| 1<br>2<br>3<br>4<br>5<br>6<br>7<br>8                                                                                             | Data sources/<br>measurement | 8*  | For each variable of interest, give sources of data and details of methods of assessment (measurement). Describe comparability of assessment methods if there is more than one group<br><i>Data sources clearly defined in Methods: Information Service Division (ISD) Scotland Western Australia Data Linkage System (Page 7) and reference population-based age and gender cancer incidence rates (Page 7-8)</i>                                                                                                                                                                                                                                                                                                                                                                                                                                                                                                                                                                                                                                                                                            |
| 9<br>10<br>11<br>12                                                                                                              | Bias                         | 9   | Describe any efforts to address potential sources of bias<br><i>Population-level linked administrative data minimises issues of selection and reporting bias, and loss to follow-up.</i>                                                                                                                                                                                                                                                                                                                                                                                                                                                                                                                                                                                                                                                                                                                                                                                                                                                                                                                      |
| 13<br>14<br>15<br>16                                                                                                             | Study size                   | 10  | Explain how the study size was arrived at<br><i>Whole of population study undertaken (Scotland and Western Australia) stated in Methods (Page 6-8).</i>                                                                                                                                                                                                                                                                                                                                                                                                                                                                                                                                                                                                                                                                                                                                                                                                                                                                                                                                                       |
| 17<br>18<br>19<br>20                                                                                                             | Quantitative variables       | 11  | Explain how quantitative variables were handled in the analyses. If applicable, describe which groupings were chosen and why<br><i>Groupings described / defined in Methods (Page 8)</i>                                                                                                                                                                                                                                                                                                                                                                                                                                                                                                                                                                                                                                                                                                                                                                                                                                                                                                                      |
| 21<br>22<br>23<br>24<br>25<br>26<br>27<br>28<br>29<br>30<br>31<br>32<br>33<br>34<br>35<br>36<br>37<br>38<br>39<br>40<br>41<br>42 | Statistical methods          | 12  | (a) Describe all statistical methods, including those used to control for confounding<br><i>All analyses clearly presented in Methods for each cohort of burn patients hospitalised in both Scotland and Western Australia: 1) from 1983 to 2008; 2) subgroup 1983-1988; and 3) by grouped age at admission (&lt;15; ≥15 and &lt;50; ≥ 50 years) (Page 8)</i><br><i>Whole of population examination of observed versus expected cancer cases using Standardised Incidence Ratios, adjusting for 5-year age group and gender, and calendar period from 1983-2008.</i><br>(b) Describe any methods used to examine subgroups and interactions<br>(c) Explain how missing data were addressed<br>(d) Cohort study—If applicable, explain how loss to follow-up was addressed<br><i>Whole of population based study using linked data (Page 6-8)</i><br><i>Case-control study—If applicable, explain how matching of cases and controls was addressed</i><br><i>Cross-sectional study—If applicable, describe analytical methods taking account of sampling strategy</i><br>(e) Describe any sensitivity analyses |
| 43                                                                                                                               | <b>Results</b>               |     |                                                                                                                                                                                                                                                                                                                                                                                                                                                                                                                                                                                                                                                                                                                                                                                                                                                                                                                                                                                                                                                                                                               |
| 44<br>45<br>46<br>47<br>48<br>49<br>50                                                                                           | Participants                 | 13* | a) Report numbers of individuals at each stage of study—eg numbers potentially eligible, examined for eligibility, confirmed eligible, included in the study, completing follow-up, and analysed<br><i>Numbers of patient records included in study clearly stated in Results (Pages 8-9)</i><br>(b) Give reasons for non-participation at each stage<br>(c) Consider use of a flow diagram                                                                                                                                                                                                                                                                                                                                                                                                                                                                                                                                                                                                                                                                                                                   |
| 51<br>52<br>53<br>54<br>55<br>56<br>57<br>58<br>59<br>60                                                                         | Descriptive data             | 14* | (a) Give characteristics of study participants (eg demographic, clinical, social) and information on exposures and potential confounders<br><i>Data presented in Table 1 (Page 15)</i><br>(b) Indicate number of participants with missing data for each variable of interest<br><i>N/A</i><br>(c) Cohort study—Summarise follow-up time (eg, average and total amount)<br><i>Average follow up time presented for each patient cohort in Results (Page 9)</i>                                                                                                                                                                                                                                                                                                                                                                                                                                                                                                                                                                                                                                                |



|                          |     |                                                                                                                                                                                                                                                                                                                                                                                                                                                                                                                                                                                                                                                                                                                                                                                      |
|--------------------------|-----|--------------------------------------------------------------------------------------------------------------------------------------------------------------------------------------------------------------------------------------------------------------------------------------------------------------------------------------------------------------------------------------------------------------------------------------------------------------------------------------------------------------------------------------------------------------------------------------------------------------------------------------------------------------------------------------------------------------------------------------------------------------------------------------|
| Outcome data             | 15* | <p><i>Cohort study</i>—Report numbers of outcome events or summary measures over time<br/>Presented in Results (Page 9) and Table 2 (Page 16), Table 3 (Page 17) and Table 4 (Page 18)</p> <hr/> <p><i>Case-control study</i>—Report numbers in each exposure category, or summary measures of exposure</p> <hr/> <p><i>Cross-sectional study</i>—Report numbers of outcome events or summary measures</p>                                                                                                                                                                                                                                                                                                                                                                           |
| Main results             | 16  | <p>(a) Give unadjusted estimates and, if applicable, confounder-adjusted estimates and their precision (eg, 95% confidence interval). Make clear which confounders were adjusted for and why they were included<br/><i>Standardised Incidence Ratio (SIR) and 95% Confidence Intervals clearly presented in text and Tables with appropriate labelling of variables standardised for (e.g. 5-year age groups, gender). Presented in Results (Page 9) and Table 2 (Page 16), Table 3 (Page 17) and Table 4 (Page 18)</i></p> <hr/> <p>(b) Report category boundaries when continuous variables were categorized<br/>Age boundaries clearly reported</p> <hr/> <p>(c) If relevant, consider translating estimates of relative risk into absolute risk for a meaningful time period</p> |
| Other analyses           | 17  | <p>Report other analyses done—eg analyses of subgroups and interactions, and sensitivity analyses<br/><i>All results of sub-group analyses presented. (Tables 2-4 – Pages 16-18)</i></p>                                                                                                                                                                                                                                                                                                                                                                                                                                                                                                                                                                                             |
| <b>Discussion</b>        |     |                                                                                                                                                                                                                                                                                                                                                                                                                                                                                                                                                                                                                                                                                                                                                                                      |
| Key results              | 18  | <p>Summarise key results with reference to study objectives<br/><i>Page 12</i></p>                                                                                                                                                                                                                                                                                                                                                                                                                                                                                                                                                                                                                                                                                                   |
| Limitations              | 19  | <p>Discuss limitations of the study, taking into account sources of potential bias or imprecision. Discuss both direction and magnitude of any potential bias<br/><i>Strengths and limitations of the study have been presented in the Discussion 4.2 Methodological Issues (Pages 10-11).<br/>The burn patient cohorts under study are part of the respective reference populations, and as such, this may have a diluting effect in the standardised incidence ratios. The results presented are for the total burn patient cohorts including both severe and non-severe burns; the results are therefore, conservative.</i></p>                                                                                                                                                   |
| Interpretation           | 20  | <p>Give a cautious overall interpretation of results considering objectives, limitations, multiplicity of analyses, results from similar studies, and other relevant evidence.<br/><i>The results are conservative and results have been interpreted in light of current literature on the impacts of burn injury on the immune system and other systemic effects. (Pages 10 – 13)</i></p>                                                                                                                                                                                                                                                                                                                                                                                           |
| Generalisability         | 21  | <p>Discuss the generalisability (external validity) of the study results<br/><i>Expected that the sex dimorphic effects on cancer post-burn are generalisable.<br/>The evidence of increased cancer incidence after burn injury, with a greater effect in females, suggests the systemic immune response to burn injury may be a mediator of cancer susceptibility. (Page 13)</i></p>                                                                                                                                                                                                                                                                                                                                                                                                |
| <b>Other information</b> |     |                                                                                                                                                                                                                                                                                                                                                                                                                                                                                                                                                                                                                                                                                                                                                                                      |
| Funding                  | 22  | <p>Give the source of funding and the role of the funders for the present study and, if applicable, for the original study on which the present article is based<br/><i>Funding sources disclosed (Pages 3, 14)</i></p>                                                                                                                                                                                                                                                                                                                                                                                                                                                                                                                                                              |

\*Give information separately for cases and controls in case-control studies and, if applicable, for exposed and unexposed groups in cohort and cross-sectional studies.

1  
2  
3  
4  
5  
6  
7  
8  
9  
10  
11  
12  
13  
14  
15  
16  
17  
18  
19  
20  
21  
22  
23  
24  
25  
26  
27  
28  
29  
30  
31  
32  
33  
34  
35  
36  
37  
38  
39  
40  
41  
42  
43  
44  
45  
46  
47  
48  
49  
50  
51  
52  
53  
54  
55  
56  
57  
58  
59  
60

**Note:** An Explanation and Elaboration article discusses each checklist item and gives methodological background and published examples of transparent reporting. The STROBE checklist is best used in conjunction with this article (freely available on the Web sites of PLoS Medicine at <http://www.plosmedicine.org/>, Annals of Internal Medicine at <http://www.annals.org/>, and Epidemiology at <http://www.epidem.com/>). Information on the STROBE Initiative is available at [www.strobe-statement.org](http://www.strobe-statement.org).

For peer review only



**Burn injury, gender and cancer risk: population-based cohort study using data from Scotland and Western Australia**

|                                 |                                                                                                                                                                                                                                                                                                                                                                                                                                                                                                                                                                                                                                                                                                                                                         |
|---------------------------------|---------------------------------------------------------------------------------------------------------------------------------------------------------------------------------------------------------------------------------------------------------------------------------------------------------------------------------------------------------------------------------------------------------------------------------------------------------------------------------------------------------------------------------------------------------------------------------------------------------------------------------------------------------------------------------------------------------------------------------------------------------|
| Journal:                        | <i>BMJ Open</i>                                                                                                                                                                                                                                                                                                                                                                                                                                                                                                                                                                                                                                                                                                                                         |
| Manuscript ID:                  | bmjopen-2013-003845.R1                                                                                                                                                                                                                                                                                                                                                                                                                                                                                                                                                                                                                                                                                                                                  |
| Article Type:                   | Research                                                                                                                                                                                                                                                                                                                                                                                                                                                                                                                                                                                                                                                                                                                                                |
| Date Submitted by the Author:   | 30-Oct-2013                                                                                                                                                                                                                                                                                                                                                                                                                                                                                                                                                                                                                                                                                                                                             |
| Complete List of Authors:       | Duke, Janine; University of Western Australia, School of Surgery, Burn Injury Research Unit<br>Bauer, Jacqui; Curtin University, Population Health Research Network, Centre for Data Linkage<br>Fear, Mark; University of Western Australia, School of Surgery, Burn Injury Research Unit<br>Rea, Suzanne; University of Western Australia, School of Surgery, Burn Injury Research Unit; Burns Service of Western Australia, Royal Perth and Princess Margaret Hospitals<br>Wood, Fiona; University of Western Australia, School of Surgery, Burn Injury Research Unit; Burns Service of Western Australia, Royal Perth and Princess Margaret Hospitals<br>Boyd, James; Curtin University, Population Health Research Network, Centre for Data Linkage |
| <b>Primary Subject Heading</b>: | Epidemiology                                                                                                                                                                                                                                                                                                                                                                                                                                                                                                                                                                                                                                                                                                                                            |
| Secondary Subject Heading:      | Research methods                                                                                                                                                                                                                                                                                                                                                                                                                                                                                                                                                                                                                                                                                                                                        |
| Keywords:                       | Health informatics < BIOTECHNOLOGY & BIOINFORMATICS, EPIDEMIOLOGY, International health services < HEALTH SERVICES ADMINISTRATION & MANAGEMENT, Epidemiology < ONCOLOGY, PUBLIC HEALTH                                                                                                                                                                                                                                                                                                                                                                                                                                                                                                                                                                  |
|                                 |                                                                                                                                                                                                                                                                                                                                                                                                                                                                                                                                                                                                                                                                                                                                                         |

SCHOLARONE™  
Manuscripts

1  
2  
3 **Burn injury, gender and cancer risk: population-based cohort study using data from Scotland and**  
4 **Western Australia**  
5

6 Janine M. Duke,<sup>1</sup> Jacqui Bauer,<sup>2</sup> Mark W. Fear,<sup>1</sup> Suzanne Rea,<sup>1,3</sup> Fiona M. Wood,<sup>1,3,4</sup> James Boyd  
7  
8 <sup>2</sup>

- 9  
10 1. Burn Injury Research Unit, School of Surgery, University of Western Australia, Western  
11 Australia  
12  
13 2. Population Health Research Network, Centre for Data Linkage, Curtin University, Western  
14 Australia  
15  
16 3. Burns Service of Western Australia, Royal Perth Hospital and Princess Margaret Hospital,  
17 Western Australia  
18  
19 4. Fiona Wood Foundation, Western Australia  
20  
21  
22  
23

24 **Authors:**  
25

- 26  
27 1. Janine M. Duke  
28 Associate Professor  
29

30  
31 Burn Injury Research Unit, School of Surgery, Faculty of Medicine, Dentistry and Health Sciences, The  
32 University of Western Australia, M318 35 Stirling Highway, Crawley, 6009, Western Australia  
33

- 34  
35 2. Jacqui Bauer  
36 Research Associate  
37

38  
39 Population Health Research Network, Centre for Data Linkage, Curtin University, Perth, 6845,  
40 Western Australia  
41

- 42  
43 3. Mark W. Fear  
44 Associate Professor  
45

46  
47 Burn Injury Research Unit, School of Surgery, Faculty of Medicine, Dentistry and Health Sciences, The  
48 University of Western Australia, M318 35 Stirling Highway, Crawley, 6009, Western Australia  
49

- 50  
51 4. Suzanne Rea  
52 Professor, Burns Surgeon  
53

54  
55 Burns Service of Western Australia, Royal Perth Hospital and Princess Margaret Hospital, Perth 6000  
56  
57  
58  
59  
60

1  
2  
3 Burn Injury Research Unit, School of Surgery, Faculty of Medicine, Dentistry and Health Sciences, The  
4 University of Western Australia, M318 35 Stirling Highway, Crawley, 6009, Western Australia

5  
6  
7 5. Fiona M. Wood

8 Professor, Burns Surgeon, Director of Burns Service of Western Australia

9  
10  
11 Burn Injury Research Unit, School of Surgery, Faculty of Medicine, Dentistry and Health Sciences, The  
12 University of Western Australia, M318 35 Stirling Highway, Crawley, 6009, Western Australia

13  
14 Burns Service of Western Australia, Royal Perth Hospital, Perth, Western Australia

15  
16 Fiona Wood Foundation, Perth, Western Australia

17  
18  
19 6. James Boyd

20 Associate Professor

21  
22 Population Health Research Network, Centre for Data Linkage, Curtin University, Perth, 6845,  
23 Western Australia

24  
25  
26  
27  
28  
29 **\*Address for correspondence:**

30 Associate Professor Janine M. Duke

31  
32  
33 Email: [janine.duke@uwa.edu.au](mailto:janine.duke@uwa.edu.au)

1  
2  
3 **Burn injury, gender and cancer risk: population-based cohort study using data from Scotland and**  
4 **Western Australia**

5  
6 **Abstract**

7  
8 **Objective:** To investigate risk of cancer and potential gender effects in persons hospitalised with  
9 burn injury.

10  
11  
12 **Design:** Population-based retrospective cohort study using record-linkage systems in Scotland and  
13 Western Australia

14  
15  
16 **Subjects:** Records of 37,890 and 23,450 persons admitted with a burn injury in Scotland and  
17 Western Australia, respectively, from 1983 to 2008. De-identified extraction of all linked hospital  
18 morbidity records, mortality and cancer records were provided by the Information Service Division  
19 Scotland and the Western Australian Data Linkage Service.

20  
21  
22 **Main outcome measures:** Total and gender specific numbers of observed and expected cases of all-  
23 cause and site-specific cancers and standardised incidence ratios.

24  
25  
26 **Results:** From 1983-2008, for female burn survivors there was a greater number of observed versus  
27 expected notifications of all-cause cancer with 1011 (standardised incidence ratio (SIR), 95%  
28 confidence interval (CI): 1.3, 1.2 to 1.4) and 244 (SIR, 95%CI: 1.12, 1.05 to 1.30), respectively, for  
29 Scotland and Western Australia. No statistically significant difference in all-cause cancer risk was  
30 found for males. Significant excesses in observed cancers amongst burn survivors (combined gender)  
31 in Scotland and Western Australian were found for buccal cavity, liver, larynx and respiratory tract,  
32 and for cancers of the female genital tract.

33  
34  
35  
36  
37  
38 **Conclusions:** Results from the Scotland data confirmed the increased risk of 'all-cause' cancer  
39 previously observed amongst female burn survivors in Western Australia. The gender dimorphism  
40 observed in this study may be related to the role of gender in the immune response to burn injury.  
41 More research is required to understand the underlying mechanism(s) that may link burn injury with  
42 an increased risk of some cancers.  
43  
44  
45  
46  
47  
48  
49  
50  
51  
52  
53  
54  
55  
56  
57  
58  
59  
60

1  
2  
3  
4  
5 **Article Focus**  
6

- 7 • Burn injury not only affects the skin but also has other systemic effects
- 8 • Inflammatory and immune response to burns may mediate cancer risk
- 9 • Gender differences in cancer risk after burn injury may be related to the immune response

10  
11  
12 **Key messages**  
13

- 14 • Burn injury can have impacts on longer term health
- 15 • Increased risk of some cancers post-burn injury is greater in females than males

16  
17  
18 **Strengths and Limitations**  
19

- 20 • Population-level linked administrative data minimises issues of selection and reporting bias,  
21 and loss to follow-up
  - 22 • Consistency of results using population-level data from two patient populations provides  
23 greater support for link between burn injury and some cancers
  - 24 • Unable to examine impact of burn severity on cancer risk due to lack of available data
- 25  
26  
27  
28  
29  
30  
31  
32  
33  
34  
35  
36  
37  
38  
39  
40  
41  
42  
43  
44  
45  
46  
47  
48  
49  
50  
51  
52  
53  
54  
55  
56  
57  
58  
59  
60

## Burn injury, gender and cancer risk: population-based cohort study using data from Scotland and Western Australia

### 1. Introduction

The burden of burn injury is a significant issue, not only in terms of the acute care perspective but also the chronic health effects resulting from both the injury event and the subsequent treatments. While burns predominantly affect the skin, burns are associated with significant systemic effects<sup>1-3</sup>, depressed immune functioning<sup>4-8</sup> and prolonged periods of systemic catabolism and hypermetabolism.<sup>9</sup> Prompted by a clinical scenario of a diagnosis of hepatocellular carcinoma in a young male burn patient,<sup>10</sup> and the potential for malignancy after burn, an initial study of burn injury and all-cause cancer risk was undertaken.<sup>11</sup> Results of this study demonstrated a gender effect with female burn survivors having an increased risk of all-cause cancer.

This previous study of burn injury and cancer risk used population-based data linked by the Western Australian Data Linkage System (WADLS).<sup>12</sup> Data linkage in Western Australia provides one of only a handful of information-rich environments worldwide that have been constructed from the linkage of multiple, large, population-based, administrative datasets. The WADLS meets international best practice standards, determined by experiences from the Oxford Record Linkage Study, Scottish Record Linkage System, Rochester Epidemiology Project and the Manitoba Centre for Health Policy.<sup>12</sup> Western Australia has a population of approximately 2.2 million, and as such, did not support detailed gender and site-specific cancer incidence assessments with adequate statistical power. While the WADLS has systematically linked datasets of Western Australians since the 1970s, other Australian States and Territories have only recently established record linkage systems and were not able to support this study. To extend the population-base and enable further detailed examination of the observed gender effect and site specific cancer incidence, approval was sought to access the Scottish population-based record linkage system, the Information Service Division (ISD) Scotland,<sup>13</sup> that has routinely linked health data since the 1980s.

This paper reports a retrospective longitudinal study to explore cancer risk after burn injury using linked hospital morbidity, cancer and death data of persons hospitalised for burn injury in both Western Australia and Scotland. The study aimed to, firstly, confirm the increased risk of 'all-cause' cancer observed in the preliminary Western Australian study of female burn survivors using the Scottish data; and, secondly, examine site-specific cancer risk amongst survivors of burn injury.

### 2. Methods

Study data were obtained from the Western Australian Data Linkage Service (WADLS)<sup>12</sup> and the Information and Services Division (ISD Scotland) of the National Health Service National Services



1  
2  
3 Scotland<sup>13</sup> with approval from Curtin University, the Western Australia Department of Health Human  
4 Research Ethics Committees and the NHS National Services Scotland Privacy Advisory Committee.  
5 The WADLS and ISD Scotland are validated record linkage systems that routinely link administrative  
6 health data from core datasets for the entire population of Western Australia and Scotland,  
7 respectively.  
8  
9

10  
11 An index burn injury was defined as the first hospital admission with a burn injury using primary and  
12 additional diagnosis International Classification of Diseases (ICD) codes 940-949 (ICD9) and T20-T31  
13 (ICD10). A de-identified extraction of all linked hospital morbidity records (Hospital Morbidity Data  
14 System (HMDS), mortality (Death Register, Western Australia) and cancer records (Western Australia  
15 Cancer Registry (WACR)) for all persons admitted to hospital with an index burn injury in Western  
16 Australia, for the period 1 January 1983 to 31 December 2008, was performed by WADLS <sup>14</sup>. A  
17 corresponding de-identified extraction of all linked hospital morbidity records (Scottish Morbidity  
18 Records (SMR) 01), cancer registrations (SMR06) and death records (General Register Office for  
19 Scotland (GROS)) using the same burn cohort definition was undertaken by ISD Scotland. Hospital  
20 admissions data items included age at admission, gender, admission date, separation date, principal  
21 and additional diagnoses and external cause of injury.  
22  
23

24  
25 The Western Australia Cancer Registry (WACR) was established in 1981 and is a population-based  
26 cancer registry based on mandatory notification of cancers from pathologists, haematologists and  
27 radiation oncologist, and cancer information from death records.<sup>15</sup> Amendments to the Health  
28 (Notification of Cancer) Regulations in 1996 required from that time, notifications of all in situ, non-  
29 melanoma skin cancers other than basal cell and squamous cell carcinomas, and, all other invasive  
30 malignancies and benign Central Nervous System tumours. <sup>15</sup> Malignant cancers are coded according  
31 to a modified Australian version of the International Classification of Diseases, Tenth Revision  
32 (ICD10-AM) and International Classification of Diseases for Oncology (ICD-O-3).  
33  
34

35  
36 The Scotland Cancer Registry (SMR06) has recorded all incident cancers in Scotland from 1958, and  
37 since 1997 registration has been centralised at ISD Scotland.<sup>16</sup> The registry is responsible for the  
38 collection of information on all new cases of primary malignant neoplasms, carcinoma in situ  
39 (including grade III intra-epithelial neoplasia), neoplasms of uncertain behaviour and (since 1 January  
40 2000) benign brain and spinal cord tumours arising in residents of Scotland. Data quality is  
41 monitored using routine indicators, computer validation and ad hoc studies of data accuracy and  
42 completeness of ascertainment.<sup>17 18</sup> The Scottish cancer notifications are coded using the  
43 International Classification of Diseases (ICD) and the International Classification of Diseases for  
44 Oncology (ICD-O).  
45  
46  
47  
48  
49  
50  
51  
52  
53  
54  
55  
56  
57  
58  
59  
60

1  
2  
3 Methods for analysis have been previously published.<sup>11</sup> An incident cancer was defined as a cancer  
4 diagnosis notification (C00-C96, excluding C44) after hospital admission for index burn injury.  
5 Analysis was restricted to malignant neoplasm notifications (C00-C96, excluding C44) for which all-  
6 cause and site-specific cancer incident rates were provided by WACR and ISD Scotland for respective  
7 populations. Records were excluded from the analysis if the date of cancer diagnosis was prior to  
8 date of discharge for index burn hospitalisation. When a record was identified as having more than  
9 one malignant neoplasm notification, each neoplasm was counted as an individual record, however,  
10 if multiple tumours of the skin (C43) with identical morphological characteristics (that is, the first  
11 three digits ICD-O-3 morphology code) were identified, they were recorded only once. Gender and  
12 age-specific cancer (total C00-C96, excluding C44) incident rates for the Western Australian and  
13 Scottish populations were pooled for the calendar periods 1983-1988, 1989-1993, 1994-1998, 1999-  
14 2003 and 2004-2008 to allow for changes in population cancer incidence during the study period.

15  
16 For the determination of incident rates, the calculation of person-years began on the day of final  
17 hospital discharge for the index burn admission and the study observation period continued until  
18 date of cancer diagnosis, death, or 31<sup>st</sup> December 2008, whichever occurred first. The observed  
19 numbers of cases of cancer and person-years at risk were calculated by age (5-year age groups),  
20 gender and calendar period (1983-1988, 1989-1993, 1994-1998, 1999-2003 and 2004-2008). The  
21 expected numbers of cancer cases were estimated by multiplying the specific number of person  
22 years per category by the corresponding incidence of cancer in Western Australia, Scotland, and  
23 combined cancer incidence rates, provided by WACR and ISD Scotland. The Standardised Incident  
24 Ratios (SIRs) were calculated by dividing the observed number of cases by the number expected.<sup>19 20</sup>  
25 The 95% confidence intervals (95%CI) were defined under the assumption that the observed number  
26 of cancers followed the Poisson distribution.<sup>21</sup>

27  
28 Separate SIR analyses for all-cause and site-specific cancers were conducted using country specific  
29 data for respective burn patient cohorts (all burn depth) for cohorts hospitalised from 1983-2008;  
30 all-cause SIRs repeated for sub-cohorts of burn admissions from 1983-1987, with optimum follow-up  
31 time. To further explore the gender impact of burn injury on cancer risk, all-cause cancer SIR  
32 analyses were repeated on age-restricted sub-cohorts classified to reflect reproductive age at  
33 admission for burn injury: <15 years; 15-49 years; and, ≥50 years. All statistical analyses were  
34 performed using Stata statistical software V 11 (StataCorp LP, College Station, Tex).

### 3. Results

35  
36 As previously reported, in Western Australia from 1983 to 2008, there were 23,450 hospital index  
37 admissions for burn-related injury.<sup>14</sup> After exclusion of records with a history of cancer prior to  
38  
39  
40  
41  
42  
43  
44  
45  
46  
47  
48  
49  
50  
51  
52

1  
2  
3 separation date or death during hospital admission for burn, a total of 22,705 patient records were  
4 included in the analysis.<sup>11</sup> There were 673 patients with a first cancer notification after date of  
5 separation for burn injury hospitalisation, and with inclusion of multiple malignancies, 759 cancer  
6 notifications were included in the standardised incident ratio analyses as independent observations.  
7  
8

9  
10 In Scotland from 1983-2008, there were a total of 37,890 persons hospitalised for an index burn-  
11 related injury. After exclusion of those with a history of cancer prior to separation date or death  
12 during hospital admission for burn, a total of 37,506 patients were included in the analysis. There  
13 were 2,005 patients with a first cancer notification after date of separation for burn injury  
14 hospitalisation, and with inclusion of multiple malignancies, 2,260 cancer notifications were included  
15 in the standardised incident ratio analyses as independent observations. Characteristics of the  
16 Western Australia and Scotland cohorts are presented in Table 1.  
17  
18  
19  
20

21  
22 The Western Australia cohort (1983-2008; combined gender) was followed for a total of 283,306  
23 person-years, with mean follow-up time of 12.3 years (range: >0 – 25.9 years). Mean follow-up time  
24 for those with a cancer notification was 9.4 years (range: >0 – 25.4) and for those with no cancer  
25 notification, 12.4 years (range: >0 – 25.9). The Scotland cohort (1983-2008; combined gender) was  
26 followed for a total of 474,489 person-years, with mean follow-up time of 12.6 years (range: 0 -26.0  
27 years). Mean follow-up time for those with a cancer notification was 9.4 years (range: >0-25.8) and  
28 for those with no cancer notification, 12.7 years (range: >0-26.0).  
29  
30  
31  
32

33  
34 For the Scottish cohort of burn injury patients (combined gender) there was marginal but significant  
35 difference (SIR, 95%CI: 1.09, 1.05-1.10) in the overall risk of cancer for persons with a burn injury  
36 hospitalisation for the period 1983 to 2008, compared with the general population of Scotland.  
37 While a significant increase of 30% in cancer risk was estimated for females there was no difference  
38 in cancer risk for males, when compared with the general population of Scotland (refer to Table 2).  
39 For the sub-cohort of burn injury patients 1983-1988, the total observed number of cases of cancer  
40 (n=838) was statistically significantly lower than expected (n=953.4) with SIR (95%CI) of 0.88 (0.82 to  
41 0.94), with males having a statistically significantly lower number of cases observed than expected.  
42 Refer to Table 2 for gender specific SIRs for all-cause cancer for Scotland and Western Australian  
43 burn patients, hospitalised during 1983-1988 and 1983-2008.<sup>11</sup>  
44  
45  
46  
47  
48  
49

50  
51 Female genital cancers were grouped due to the small numbers of observed cancers in sub-groups in  
52 the Western Australian data and unstable SIR results. Statistically significant increases in observed  
53 genital (combined) cancers for female burn patients in both Western Australia and Scotland were  
54 found. The increased breast cancer incidence was statistically significant amongst female burn  
55 survivors in Scotland. Statistically significant increases in cancer incidence for combined gender for  
56  
57  
58  
59  
60

1  
2  
3 both Western Australia and Scottish data were observed for cancers of the buccal cavity, liver and  
4 respiratory tract. Refer to Table 3 for gender and site-specific cancer SIRs. For each of these cancers,  
5 female burn survivors in both Western Australia and Scotland had higher incidence than males when  
6 compared with respective general population data. For the majority of site-specific cancers selected,  
7 female burn survivors in both Western Australia and Scotland had higher numbers of observed  
8 cancers than expected, with SIRs of similar magnitude. However, SIR results for Scottish data  
9 reached statistical significance, reflecting the larger population-base and respective higher number  
10 of cancer notifications.

11  
12 Table 4 presents an SIR analyses of all-cause cancer risk repeated on age-restricted sub-cohorts,  
13 classified to reflect reproductive age (<15 years; 15-49 years; and, ≥50 years) at admission for burn  
14 injury. For males in both WA and Scotland, no statistically significant differences were found across  
15 the three age groups. For female burn survivors in Scotland, the observed numbers of cancers (all-  
16 cause) exceeded that expected for each of the three age groups, with statistically significant results  
17 observed for the age groups 15-49, and 50 years and older. In the Western Australia data, excess  
18 cancers were observed for those younger than 15 years and for those 50 years and older, with  
19 statistically significance reached for the older age group; for females 15-49 years at burn injury, no  
20 difference in observed and expected all-cause cancer was found.

## 31 4. Discussion

### 32 4.1 Methodological Issues

33  
34 Data linkage is a technique which creates links within and between data sources, identifying all the  
35 information that relates to the same person, place or event. In addition, when population-level  
36 administrative data are used, data linkage minimises issues of selection and reporting bias, as well as  
37 loss to follow-up. Data quality of the Western Australia and Scottish Cancer Registers<sup>15 17 18</sup> and  
38 hospital morbidity datasets<sup>22 23</sup> are assessed continually for both accuracy and quality; however,  
39 potential for misclassification bias may exist. The coding system changed from ICD-9 to ICD-10 in  
40 both Western Australia and Scotland during the study period for death and hospital admissions data.

41  
42 Data of all index burn hospitalisations in Western Australia and Scotland from 1983 to 2008 were  
43 analysed with follow-up time from discharge date, allowing for exclusion of prevalent cancers to  
44 support temporality of burn exposure and incident cancer. Cancer diagnoses from cancer registries  
45 in Western Australia and Scotland were independent of the record of burn injury in the respective  
46 hospital morbidity datasets. Minor burns treated in emergency departments were not included in  
47 the study. The burn patient cohorts under study are part of the respective reference populations,  
48 and as such, this may have a small diluting effect in the standardised incidence ratios. Western  
49  
50  
51  
52  
53  
54  
55  
56  
57  
58  
59  
60

1  
2  
3 Australia has a population of approximately 2.2 million, and as such, did not support detailed gender  
4 and site-specific cancer incidence assessments. Using parallel datasets from Scotland, of population  
5 approximately 5.5 million, allowed examination of the consistency of results and trends across the  
6 populations.  
7  
8

9  
10 The Western Australia hospital morbidity data records the principal diagnosis and up to 20  
11 additional diagnosis fields, whereas, the Scottish morbidity data includes the principal diagnosis and  
12 5 additional diagnosis fields. The effects of this reduction in the number of available additional  
13 diagnosis fields included the more frequent use in the Scottish data of ICD codes for burns to  
14 multiple regions of the body (ICD9 946; ICD10 T29) rather than recording of multiple individual  
15 anatomic burn sites, reflected in Table 1; and, an absence of consistently recorded supplementary  
16 ICD (ICD9 946; ICD10 T31) data to describe total body surface area burned (TBSA%). This limited our  
17 capacity to undertake both SIR analyses restricted to more severe burns of TBSA 20% or greater and  
18 incident rate ratio analysis to examine the effects of severity of burn injury (burn depth and TBSA%)  
19 using the least exposed group as reference (instead of the general population of Scotland) and  
20 confirm previous results. Approximately 90% of persons hospitalised in Western Australia had non-  
21 severe burn injury (TBSA<20%).<sup>14</sup> Previous SIR analyses of all-cause cancer risk in Western Australia  
22 showed similar trends in results for all burn patients (severe and non-severe) and those hospitalised  
23 for severe burn; however, for females hospitalised with severe burn there was a statistically  
24 significant increase of 31% in all-cause cancer notifications.<sup>11</sup>  
25  
26

27  
28 The data analysed in this study are based on linked data from population registers to compare  
29 observed cancer incidence in burn patient cohorts with that expected using general population  
30 cancer rates adjusting for gender, age and calendar period population changes. Although this study  
31 had a follow-up period of up to 26 years from the date of separation for admission for burn injury,  
32 the follow up period for many patients may not have provided sufficient observation time to enable  
33 identification of all potential malignancies, given the long latency period for many cancers. Further  
34 burn injury research is planned with comparison cohorts (non-burn trauma, no injury), using  
35 incidence rate ratio analyses to explore injury and patient factors associated with the observed  
36 cancer risk.  
37  
38

#### 39 40 41 42 43 44 45 46 47 48 49 **4.2 Findings**

50  
51 Analysis of ISD Scotland data confirmed the results of our previous study: a statistically significant  
52 increase in all-cause cancer risk for female burn survivors with males experiencing no difference. The  
53 site specific analyses clearly showed statistically significant increases in the number of observed  
54 cancers for combined gender in both the Western Australia and Scottish data for the buccal cavity,  
55  
56  
57  
58  
59  
60

1  
2  
3 larynx, liver, respiratory tract and oesophagus. There was also a general trend for increased cancer  
4 risk for most of the selected types of cancers for females and statistically significant increases in  
5 female genital cancers. Sub group analyses, defined crudely by reproductive age, did not elucidate  
6 any clear patterns of the influence of oestrogen on cancer incidence, with female burn survivors in  
7 Scotland showing increased risk across all age groups. For female burn survivors in WA, an increased  
8 risk for all-cause cancer was found for those younger than 15 years (pre-pubescent) and 50 years  
9 and older (post-menopausal).  
10

11  
12  
13  
14  
15 The site-specific analyses showed that whilst statistically significant increases in female genital  
16 cancers were found, there was also a general trend for increased cancer risk for most of the selected  
17 types of cancers for females. Statistically significant increases in the number of observed cancers for  
18 combined gender were found in both the Western Australia and Scottish data for the buccal cavity,  
19 larynx, liver, respiratory tract and oesophagus. These results are similar to those found in a Danish  
20 study<sup>24</sup> and may be related to tobacco or alcohol use amongst this patient population. However, it  
21 would be expected that inhalation injury may also increase the cancer risk of the upper and lower  
22 respiratory tract, and in the case of the diagnosis of hepatocellular cancer in a young male (12 years  
23 of age) burn patient in Western Australia,<sup>10</sup> tobacco or alcohol use would be most unlikely  
24 attributable agents. Interestingly, the results of no increase in skin melanoma risk after burn injury in  
25 this study support findings of other population-based studies.<sup>24 25</sup>  
26

27  
28  
29  
30  
31  
32  
33 An alternative explanation for this increased incidence in cancer post-burn may lie in the significant  
34 impact a burn injury has on the immune system, or the sustained oxidative and metabolic stress that  
35 are integral to the injury response. While burn injury predominantly affects the skin, it has been  
36 shown to cause significant depression of both humoral and cell-mediated immunity (CMI),<sup>7 26 27</sup>  
37 sustained elevated levels of oxidative stress<sup>28 29</sup> and prolonged elevation of hyper-metabolic and  
38 stress hormone levels.<sup>30 31</sup> These effects have been demonstrated to persist for up to 3 years post-  
39 injury and can lead to long-term systemic impacts on other organs of the body.<sup>1 2 32-36</sup> Severe burn  
40 injury has been demonstrated to induce endoplasmic reticulum (ER) stress, in particular, in the  
41 liver.<sup>37</sup> ER stress is a stress-response that initially facilitates cell survival but can switch to a pro-  
42 apoptotic signal with prolonged stress.<sup>37 38</sup> However, it has also been shown that the ER stress  
43 response can become maladaptive, facilitating adaptation to hypoxic environments and promoting  
44 tumour growth.<sup>38 39</sup> It is plausible that the array of host responses combined with the impact of the  
45 injury, therefore, creates an environment of increased susceptibility to cancer.  
46  
47  
48  
49  
50  
51  
52  
53

54  
55 In addition to the observed increase in some of the selected site-specific cancers, the data support  
56 evidence for a gender dimorphism (a systematic difference between individuals of different sex in  
57 the same species) in the response to burn injury. After burn injury, gender has been shown to be an  
58  
59  
60

1  
2  
3 important factor with respect to poorer outcomes for mortality<sup>40-43</sup> and improved prognosis for  
4 multiple organ dysfunction syndrome,<sup>44</sup> and sepsis,<sup>45</sup> for females compared to males. Similar gender-  
5 based differences have also been reported in animal studies of burn injury.<sup>46-50</sup>  
6  
7

8 The impact of gender with respect to outcomes after burn injury is largely thought to stem from  
9 well-established differences in immune biology. There is a substantial volume of published literature  
10 to support a gender dimorphism in the immune response<sup>51-54</sup> and sepsis<sup>45</sup> following injury that have  
11 impacts on health and mortality.<sup>41 42</sup> The majority of these studies support a more efficient and  
12 effective innate and adaptive immune responses in females, leading to more rapid clearance of  
13 infectious organisms driven by tissue resident cell populations.<sup>55</sup> This 'advantageous' response  
14 reduces the risk of infection in females compared to males<sup>55 56</sup> but leads to elevated risk of  
15 autoimmune disease.<sup>57</sup> This dimorphism was thought to arise largely due to the impact of oestrogen  
16 on immune function.<sup>58 59</sup> However, recent papers have demonstrated these differences are not  
17 completely ablated by ovariectomy (in animal models)<sup>55</sup> and others have shown that oestrogen can  
18 be deleterious to the immune response.<sup>60</sup> This suggests a role of other mediators, most likely  
19 expressed on the X-chromosome, in the maintenance of the differential immune response.<sup>61 62</sup> The  
20 evidence for gender differences in the immune response, both to thermal and other trauma, and its  
21 impact on outcomes is substantial. Here, the evidence of increased cancer incidence in selected  
22 types of cancer after burn injury, with a greater effect in females, suggests the systemic immune  
23 response to burn injury may be a mediator of cancer susceptibility.  
24  
25  
26  
27  
28  
29  
30  
31  
32  
33

### 34 35 **5. Conclusion**

36 Using population-based linked data of all burn patients in both Western Australia and Scotland,  
37 consistent trends were found in excesses in cancer notifications for a range of selected site specific  
38 cancers with an elevated and more widespread increase in female burn patients. Overall, however,  
39 the increased cancer risk affected small proportions of the respective burn patient cohorts. More  
40 research is required to understand the underlying mechanism(s) that may link burn injury to an  
41 increased risk of some cancers and why this is elevated in females, which may in turn enable  
42 identification of possible sites for intervention.  
43  
44  
45  
46  
47  
48  
49  
50  
51  
52  
53  
54  
55  
56  
57  
58  
59  
60



### Acknowledgements

The authors thank the staff of both the Health Information Linkage Branch for access to the Western Australian Data Linkage System and Scottish Record Linkage team for their assistance in obtaining the data and providing advice on aspects of coding. Furthermore, the authors would like to thank the WA Health Data Custodians for access to the core health datasets and both the Western Australian Department of Health and ISD Scotland for their assistance and advice. Project data costs were supported by an Australian National Health and Medical Research Council research grant and a Raine Medical Research Foundation Priming grant. J.M.D Senior Research Fellowship is supported by Woodside corporate sponsorship via the Fiona Wood Foundation.

For peer review only



**Table 1** Characteristics of burn injury patients included in analyses with no record of cancer prior to separation date of index burn admission, 1983-2008, by country.

| Characteristics                       | Western Australia<br>N (%) | Scotland<br>N (%) |
|---------------------------------------|----------------------------|-------------------|
| <b>Total number burn admissions*</b>  | 22,705                     | 37,506            |
| <b>Gender: Male</b>                   | 15,481 (68.2)              | 23,896 (63.7)     |
| <b>Age at index admission (Years)</b> |                            |                   |
| <15                                   | 8,135 (35.8)               | 14,579 (38.9)     |
| 15-24                                 | 4,364 (19.2)               | 4,495 (12.0)      |
| 25-49                                 | 7,147 (31.5)               | 9,554 (25.5)      |
| 50-64                                 | 1,736 (7.7)                | 4,080 (10.9)      |
| 65+                                   | 1,323 (5.8)                | 4,798 (12.8)      |
| <b>Site of burn**</b>                 |                            |                   |
| Head and neck                         | 6,784 (15.4)               | 7,592 (16.1)      |
| Trunk                                 | 7,553 (17.2)               | 8,815 (21.0)      |
| Hand, wrist, upper limb               | 15,801 (35.9)              | 6,984 (14.8)      |
| Hip , lower limb                      | 11,798 (26.8)              | 9,531 (3.4)       |
| Eye                                   | 379 (0.9)                  | 1,087 (2.3)       |
| Respiratory tract                     | 212 (0.5)                  | 163 (0.3)         |
| Other internal organs                 | 124 (0.3)                  | 165 (0.3)         |
| Multiple regions                      | 656 (1.5)                  | 3,677 (7.8)       |
| Unspecified region                    | 694 (1.6)                  | 858 (1.8)         |
| <b>Burn site depth**</b>              |                            |                   |
| Erythema                              | 8,929 (20.9)               | 4,815 (11.5)      |
| Partial thickness                     | 18,449 (41.9)              | 6,302 (15.0)      |
| Full thickness                        | 7,095 (16.1)               | 4,924 (11.7)      |
| Unspecified                           | 9,528 (21.7)               | 25,869 (61.7)     |
| <b>Calendar period of admission</b>   |                            |                   |
| 1983-1988                             | 5,431 (23.9)               | 11,507 (30.7)     |
| 1989-1993                             | 4,200 (18.5)               | 7,876 (21.0)      |
| 1994-1998                             | 4,755 (20.9)               | 7,130 (19.0)      |
| 1999-2003                             | 4,265 (18.9)               | 5,980 (15.9)      |
| 2004-2008                             | 4,054 (17.9)               | 5,013 (13.4)      |
| <b>Any co-morbidity at index burn</b> |                            |                   |
| <b>Yes</b>                            | 2,798 (12.3)               | 7,679 (20.5)      |

\* No previous record of cancer

\*\* Patients may have multiple burn sites per anatomical region per depth

**Table 2** Standardised incidence ratios and 95% confidence intervals and observed and expected numbers for all-cause cancer in persons hospitalised for burn injury in Western Australia and Scotland, during the periods 1983-2008 and 1983-1988.

|                                   | Western Australia <sup>††</sup> |                                       |                                         | Scotland                            |                                       |                                         |
|-----------------------------------|---------------------------------|---------------------------------------|-----------------------------------------|-------------------------------------|---------------------------------------|-----------------------------------------|
|                                   | Combined<br>SIR 95%CI*<br>O:E** | Male <sup>†</sup><br>SIR 95%CI<br>O:E | Female <sup>†</sup><br>SIR 95%CI<br>O:E | Combined<br>SIR 95%CI<br>O:E        | Male <sup>†</sup><br>SIR 95%CI<br>O:E | Female <sup>†</sup><br>SIR 95%CI<br>O:E |
| <b>Total cohort<br/>1983-2008</b> | 0.97 (0.9 to 1.0)<br>759: 785.5 | 0.9 (0.8 to 1.0)<br>515: 569.5        | 1.1 (1.0 to 1.3)<br>244: 216.0          | 1.09 (1.05 to 1.10)<br>2260: 2075.9 | 0.96 (0.90 to 1.0)<br>1249: 1303.2    | 1.3 (1.2 to 1.4)<br>1011: 772.6         |
| <b>Sub-cohort<br/>1983-1988</b>   | 1.0 (0.9 to 1.1)<br>294:294.9   | 0.9 (0.8 to 1.0)<br>190:220.3         | 1.4 (1.1 to 1.7)<br>104: 74.6           | 0.9 (0.8 to 0.9)<br>838: 953.4      | 0.8 (0.7 to 0.9)<br>491: 614.3        | 1.0 (0.9 to 1.2)<br>347: 339.1          |

\*SIR (95%CI): Standardised Incidence Ratio (95% confidence interval) adjusted for age and gender

\*\* O: E: Observed: Expected

<sup>†</sup>SIR (95%CI): Standardised Incidence Ratio (95% confidence interval) adjusted for age

<sup>††</sup> Western Australian comparison data Duke et al. Burns 2011; 38:340-47.

**Table 3** Standardised incidence ratios and 95% confidence intervals and observed and expected numbers for selected types of cancer in persons hospitalised for burns Western Australia and Scotland, 1983-2008.

| Cancer Site                                           | Western Australia             |                                |                              | Scotland                       |                                |                                |
|-------------------------------------------------------|-------------------------------|--------------------------------|------------------------------|--------------------------------|--------------------------------|--------------------------------|
|                                                       | Combined SIR 95%CI*<br>O:E**  | Male SIR 95%CI†<br>O:E         | Female SIR 95%CI†<br>O:E     | Combined SIR 95%CI*<br>O:E     | Male SIR 95%CI†<br>O:E         | Female SIR 95%CI†<br>O:E       |
| <b>Buccal cavity<br/>C00 to C14</b>                   | 1.4 (1.03 to 1.9)<br>45: 32.6 | 1.4 (1.0 to 1.9)<br>38:28.1    | 1.5 (0.7 to 3.2)<br>7: 4.6   | 2.6 (2.2 to 3.1)<br>117: 45.0  | 2.4 (1.9 to 2.9)<br>83: 35.1   | 3.4 (2.5 to 4.8)<br>34:9.9     |
| <b>Oesophagus<br/>C15</b>                             | 1.4 (0.9 to 2.4)<br>15:10.50  | 1.5 (0.9 to 2.6)<br>13: 8.7    | 1.1 (0.3 to 4.5)<br>2: 1.8   | 1.6 (1.3 to 2.0)<br>82: 51.4   | 1.5 (1.1 to 1.9)<br>53:36.1    | 1.9 (1.3 to 2.7)<br>29:15.3    |
| <b>Stomach<br/>C16</b>                                | 0.6 (0.3 to 1.1)<br>10:17.0   | 0.5 (0.2 to 1.1)<br>7: 13.4    | 0.8 (0.3 to 2.6)<br>3: 3.6   | 1.2 (0.9 to 1.5)<br>73:63.2    | 1.1 (0.8 to 1.5)<br>1.2 5: 2.8 | 1.3 (0.9 to 1.9)<br>25:19.5    |
| <b>Colorectal<br/>C18 to C20</b>                      | 0.7 (0.6 to 0.9)<br>69: 96.3  | 0.7 (0.5 to 0.9)<br>45: 69.1   | 0.9 (0.6 to 1.3)<br>24: 27.2 | 1.2 (1.1 to 1.4)<br>268:221.8  | 1.0 (0.9 to 1.2)<br>142:140.5  | 1.4 (1.3 to 1.8)<br>125: 81.3  |
| <b>Liver<br/>C22</b>                                  | 2.6 (1.6 to 4.0)<br>19: 7.4   | 2.2 (1.3 to 3.7)<br>14: 6.3    | 4.7 (2.0 to 11.4)<br>5: 1.1  | 1.7 (1.2 to 2.5)<br>31:18.0    | 1.5 (1.1 to 2.5)<br>22: 13.3   | 1.9 (1.0 to 3.7)<br>9: 4.7     |
| <b>Pancreas<br/>C25</b>                               | 0.7 (0.4 to 1.3)<br>11: 15.3  | 0.9 (0.5 to 1.7)<br>9: 10.4    | 0.4 (0.1 to 1.6)<br>2: 5.0   | 1.1 (0.8 to 1.5)<br>44:39.6    | 1.5 (1.03 to 2.0)<br>34: 23.4  | 0.6 (0.3 to 1.2)<br>10: 16.2   |
| <b>Larynx<br/>C32</b>                                 | 5.7 (0.9 to 3.3)<br>10: 5.7   | 1.5 (0.7 to 3.0)<br>8: 5.4     | 6.0 (1.5 to 24.1)<br>2: 0.3  | 1.9 (1.4 to 2.5)<br>39: 21.1   | 1.5 (1.1 to 2.2)<br>28: 18.5   | 4.2(2.3 to 7.7)<br>11:2.6      |
| <b>Respiratory tract<br/>C33 to C34</b>               | 1.4 (1.1 to 1.6)<br>101: 74.8 | 1.3 (1.1 to 1.7)<br>79:59.3    | 1.4 (0.9 to 2.2)<br>22:15.4  | 1.5 (1.4 to 1.7)<br>448:298.1  | 1.3 (1.2 to 1.5)<br>279:210.4  | 1.9 (1.7 to 2.2)<br>169:87.7   |
| <b>Skin –melanoma<br/>C44</b>                         | 0.7 (0.6 to 0.9)<br>72: 102.0 | 0.7 (0.6 to 1.0)<br>57: 77.9   | 0.6 (0.4 to 1.0)<br>15: 24.1 | 0.8 (0.6 to 1.1)<br>38:48.5    | 0.7 (0.4 to 1.1)<br>19:28.4    | 1.0 (0.4 to 1.1)<br>19:20.0    |
| <b>Breast<br/>C50</b>                                 | 1.0 (0.8 to 1.3)<br>65: 62.4  | 1.3 (0.2 to 9.2)<br>1: 0.8     | 1.0 (0.8 to 1.3)<br>64:61.7  | 1.7 (1.5 to 1.9)<br>271:161.4  | 0.7 (0.1 to 4.8)<br>1:1.5      | 1.6 (1.5 to 1.9)<br>270: 160.0 |
| <b>Female genital tract (combined)<br/>C51 to C57</b> |                               |                                | 1.4 (1.0 to 2.0)<br>31:26.7  |                                |                                | 1.7 (1.4 to 2.0)<br>114: 67.2  |
| <b>Male genital tract (combined)<br/>C60 to C63</b>   |                               | 0.9 (0.8 to 1.1)<br>141: 150.7 |                              |                                | 1.1 (1.0 to 1.3)<br>210: 192.6 |                                |
| <b>Prostate<br/>C61</b>                               |                               | 0.8 (0.6 to 0.9)<br>102: 135.9 |                              |                                | 1.1 (0.9 to 1.2)<br>177: 165.5 |                                |
| <b>Kidney, Bladder, UT<br/>C64 to C68</b>             | 0.5 (0.3 to 0.7)<br>17: 37.9  | 0.4 (0.2 to 0.7)<br>12: 30.9   | 0.7 (0.3 to 1.7)<br>5: 7.0   | 1.2 (1.0 to 1.4)<br>135: 110.9 | 1.2 (1.0 to 1.4)<br>96: 82.8   | 1.4 (1.0 to 1.9)<br>39: 28.0   |
| <b>Brain<br/>C71</b>                                  | 1.2 (0.7 to 1.9)<br>16: 13.9  | 1.0 (0.5 to 1.8)<br>10: 10.5   | 1.7 (0.8 to 3.9)<br>6: 3.5   | 1.5 (1.1 to 2.0)<br>39:27.0    | 1.4 (0.9 to 2.0)<br>26:19.2    | 1.7 (1.0 to 2.9)<br>13:7.8     |
| <b>Lymphomas to all</b>                               | 1.0 (0.7 to 1.4)<br>36: 35.5  | 0.8 (0.5 to 1.2)<br>20: 26.0   | 1.7 (1.03 to 2.7)<br>16:9.6  | 1.1 (0.9 to 1.4)<br>75:68.0    | 1.1 (0.8 to 1.4)<br>48:45.0    | 1.2 (0.8 to 1.7)<br>27:23.0    |
| <b>Myeloma/<br/>plasma</b>                            | 1.3 (0.7 to 2.3)<br>11: 8.6   | 1.3 (0.7 to 2.6)<br>8:6.1      | 1.2 (0.4 to 3.7)<br>3: 2.49  | 1.1 (0.7 to 1.6)<br>22:21.0    | 1.0 (0.6 to 1.7)<br>13:13.2    | 1.2 (0.6 to 2.2)<br>9: 7.8     |
| <b>Leukaemia's to all</b>                             | 1.1 (0.8 to 1.7)<br>26: 22.9  | 1.1 (0.7 to 1.8)<br>19: 17.0   | 1.2 (0.6 to 2.5)<br>7: 6.0   | 1.3 (1.01 to 1.7)<br>63:48.6   | 1.0 (0.73 to 1.4)<br>34:33.1   | 1.8 (1.3 to 2.7)<br>29: 15.5   |

\*SIR (95%CI): Standardised Incidence Ratio adjusted for age and gender (95% confidence interval)

\*\* O: E: Observed: Expected

†SIR (95%CI): Standardised Incidence Ratio adjusted for age (95% confidence interval)

**Table 4** Standardised incidence ratios and 95% confidence intervals and observed and expected numbers for all-cause cancer incidence, for persons hospitalised for burns Western Australia and Scotland, by age group, 1983 to 1988.

| Age at first burn years | SIR (95%CI)<br>(observed: expected)  |                                      |                                      |
|-------------------------|--------------------------------------|--------------------------------------|--------------------------------------|
|                         | combined gender*                     | Male†                                | Female†                              |
| <b>&lt;15</b>           |                                      |                                      |                                      |
| <b>WA</b>               | 1.17 (0.82 to 1.68)<br>(30:25)       | 1.19 (0.77 to 1.84)<br>(20:16)       | 1.15 (0.62 to 2.14)<br>(10:8.6)      |
| <b>Scotland</b>         | 0.94 (0.69 to 1.28)<br>(41:43.69)    | 0.72 (0.47 to 1.12)<br>(20:27.77)    | 1.32 (0.86 to 2.02)<br>(21:15.92)    |
| <b>15 to 49</b>         |                                      |                                      |                                      |
| <b>WA</b>               | 0.87 (0.77 to 0.99)<br>(273: 313)    | 0.87 (0.75 to 1.00)<br>(197: 226)    | 0.86 (0.69 to 1.1)<br>(76: 87)       |
| <b>Scotland</b>         | 1.21 (1.12 to 1.31)<br>(617: 509.16) | 1.04 (0.94 to 1.16)<br>(345: 331.68) | 1.53 (1.36 to 1.73)<br>(272: 177.48) |
| <b>≥ 50</b>             |                                      |                                      |                                      |
| <b>WA</b>               | 1.02 (0.93 to 1.12)<br>(456: 446)    | 0.91 (0.82 to 1.02)<br>(298: 326)    | 1.32 (1.13 to 1.54)<br>(158: 120)    |
| <b>Scotland</b>         | 1.05 (1.00 to 1.11)<br>(1602: 1523)  | 0.94 (0.88 to 1.00)<br>(884: 943.75) | 1.23 (1.15 to 1.33)<br>(718:579.25)  |

\*SIR (95%CI): Standardised Incidence Ratio adjusted for age and gender (95% confidence interval)

†SIR (95%CI): Standardised Incidence Ratio adjusted for age (95% confidence interval)

1  
2  
3 **Funding support:** This research received no specific funding. Project data costs were supported by  
4 an Australian National Health and Medical Research Council research grant and a Raine Medical  
5 Research Foundation Priming grant. J.M.D. Senior Research Fellowship is supported by Woodside  
6 corporate sponsorship via the Fiona Wood Foundation.  
7

8  
9 **Conflict of Interest Statement:** All authors declare: no support from any organisation for the  
10 submitted work; no financial relationships with any organisations that might have an interest in the  
11 submitted work in the previous three years, no other relationships or activities that could appear to  
12 have influenced the submitted work.  
13

14  
15  
16 **Article Word Count (Text only, excludes Abstract, References):** 3,507  
17

18  
19 **Number of Tables:** 4  
20

21 **Data sharing statement:** All authors have had access to the data  
22

23 The Corresponding Author has the right to grant on behalf of all authors and does grant on behalf of  
24 all authors, an exclusive licence (or non-exclusive for government employees) on a worldwide basis  
25 to the BMJ Publishing Group Ltd to permit this article (if accepted) to be published in BMJ editions  
26 and any other BMJ PGL products and sublicences such use and exploit all subsidiary rights, as set out  
27 in our licence.  
28

29  
30 **Contributions:**

31  
32 Janine Duke: Planning, conduct and reporting  
33

34 James Boyd: Planning, conduct and reporting  
35

36 Jacqui Bauer: Conduct and reporting  
37

38 Mark Fear: Reporting  
39

40 Suzanne Rea: Reporting  
41

42 Fiona Wood: Reporting  
43

44 **Guarantors:**

45  
46 Janine Duke  
47

48 James Boyd  
49  
50  
51  
52  
53  
54  
55  
56  
57  
58  
59  
60

## References

1. Anderson JR, Zorbas JS, Phillips JK, Harrison JL, Dawson LF, Bolt SE, et al. Systemic decreases in cutaneous innervation after burn injury. *J Invest Dermatol* 2010;130(7):1948-51.
2. Jeschke MG, Gauglitz GG, Kulp GA, Finnerty CC, Williams FN, Kraft R, et al. Long-term persistence of the pathophysiologic response to severe burn injury. *PLoS ONE [Electronic Resource]* 2011;6(7):e21245.
3. Rea S, Giles NL, Webb S, Adcroft KF, Evill LM, Strickland DH, et al. Bone marrow-derived cells in the healing burn wound--more than just inflammation. *Burns* 2009;35(3):356-64.
4. Deveci M, Sengezer M, Bozkurt M, Eski M, Inal A. Comparison of lymphocyte populations in cutaneous and electrical burn patients: a clinical study. *Burns* 2000;26(3):229-32.
5. Heideman M, Bengtsson A. The immunologic response to thermal injury. *World J Surg* 1992;16(1):53-6.
6. McGill SN, Cartotto RC. Herpes simplex virus infection in a paediatric burn patient: case report and review. *Burns* 2000;26(2):194-9.
7. O'Sullivan ST, O'Connor TP. Immunosuppression following thermal injury: the pathogenesis of immunodysfunction. *Br J Plast Surg* 1997;50(8):615-23.
8. Sjoberg T, Mzezewa S, Jonsson K, Salemark L. Immune response in burn patients in relation to HIV infection and sepsis. *Burns* 2004;30(7):670-4.
9. Jeschke MG, Barrow RE, Herndon DN. Extended hypermetabolic response of the liver in severely burned pediatric patients. *Arch Surg* 2004;139(6):641-7.
10. Harper A, Rea S, Wood F. Hepatocellular carcinoma in a young survivor of major burns. *Burns* 2008;34(4):572-4.
11. Duke J, Rea S, Semmens J, Edgar D, Wood F. Burn Injury and cancer risk: A state-wide longitudinal study. *Burns* 2011;38:340-47.
12. Holman CDJ, Bass AJ, Rouse IL, Hobbs MST. Population-based linkage of health records in Western Australia: development of a health service research linked database. *Aust N Z J Public Health* 1999;23(5):453-59.
13. Kendrick S, Clarke J. The Scottish Record Linkage System. *Health Bull* 1993;51(2):72-9.
14. Duke J, Wood F, Semmens J, Spilsbury K, Edgar DW, Hendrie D, et al. A 26-year population-based study of burn injury hospital admissions in Western Australia. *J Burn Care Res* 2011;32(3):379-86.
15. Threlfall T, Thompson JR. Cancer incidence and mortality in Western Australia, 2008. Statistical Series Number 87. Perth: Department of Health, Western Australia, 2010.
16. ISD Scotland. ISD Scotland, better information, better decisions, better health, 2010.
17. Brewster DH, Stockton D, Harvey J, Mackay M. Reliability of cancer registration data in Scotland, 1997. *Eur J Cancer* 2002;38(3):414-7.
18. Brewster DH, Stockton DL. Ascertainment of breast cancer by the Scottish Cancer Registry: an assessment based on comparison with five independent breast cancer trials databases. *Breast* 2008;17(1):104-6.
19. Gordis L. *Epidemiology* Second ed. Philadelphia: W.B. Saunders Company, 2000.
20. Verkasalo PK, Pukkala E, Kaprio J, Heikkila KV, Koskenvuo M. Magnetic fields of high voltage power lines and risk of cancer in Finnish adults: nationwide cohort study. *BMJ* 1996;313(7064):1047-51.
21. Bailar III J, Ederer F. Significance Factors for the Ratio of a Poisson Variable to Its Expectation. *Biometrics* 1964;20:639-43.
22. ISD Scotland. Assessment of SMR01 Data 2010-2011 Scotland Report May 2012. Edinburgh: NHS National Services Scotland, 2012.
23. Department of Health Western Australia. Clinical Information Audit Program - Hospital Activity Report. *Operational Directive OD 0201/09*. Perth Department of Health WA, 2009.

- 1
  - 2
  - 3
  - 4
  - 5
  - 6
  - 7
  - 8
  - 9
  - 10
  - 11
  - 12
  - 13
  - 14
  - 15
  - 16
  - 17
  - 18
  - 19
  - 20
  - 21
  - 22
  - 23
  - 24
  - 25
  - 26
  - 27
  - 28
  - 29
  - 30
  - 31
  - 32
  - 33
  - 34
  - 35
  - 36
  - 37
  - 38
  - 39
  - 40
  - 41
  - 42
  - 43
  - 44
  - 45
  - 46
  - 47
  - 48
  - 49
  - 50
  - 51
  - 52
  - 53
  - 54
  - 55
  - 56
  - 57
  - 58
  - 59
  - 60
24. Mellekjaer L, Holmich LR, Gridley G, Rabkin C, Olsen JH. Risks for skin and other cancers up to 25 years after burn injuries. *Epidemiology* 2006;17(6):668-73.
25. Lindelof B, Krynitz B, Granath F, Ekblom A. Burn injuries and skin cancer: a population-based cohort study. *Acta Derm Venereol* 2008;88(1):20-2.
26. Horgan PG, Mannick JA, Dubravec DB, Rodrick ML. Effect of low dose recombinant interleukin 2 plus indomethacin on mortality after sepsis in a murine burn model. *Br J Surg* 1990;77(4):401-4.
27. Schmand JF, Ayala A, Chaudry IH. Effects of trauma, duration of hypotension, and resuscitation regimen on cellular immunity after hemorrhagic shock. *Crit Care Med* 1994;22(7):1076-83.
28. Liu D-m, Sun B-w, Sun Z-w, Jin Q, Sun Y, Chen X. Suppression of inflammatory cytokine production and oxidative stress by CO-releasing molecules-liberated CO in the small intestine of thermally-injured mice. *Zhongguo Yao Li Xue Bao/Acta Pharmacologica Sinica* 2008;29(7):838-46.
29. Shupp JW, Nasabzadeh TJ, Rosenthal DS, Jordan MH, Fidler P, Jeng JC. A review of the local pathophysiologic bases of burn wound progression. *J Burn Care Res* 2010;31(6):849-73.
30. Atiyeh BS, Gunn SWA, Dibo SA. Metabolic implications of severe burn injuries and their management: a systematic review of the literature. *World J Surg* 2008;32(8):1857-69.
31. Williams FN, Herndon DN, Jeschke MG. The hypermetabolic response to burn injury and interventions to modify this response. *Clin Plast Surg* 2009;36(4):583-96.
32. Ananthakrishnan P, Cohen DB, Xu DZ, Lu Q, Feketeova E, Deitch EA. Sex hormones modulate distant organ injury in both a trauma/hemorrhagic shock model and a burn model. *Surgery* 2005;137(1):56-65.
33. Dreschsler S, Weixelbaumer K, Raeven P, Jafarmadar M, Khadam A, van Griensven M, et al. Relationship between Age/Gender-Induced Survival Changes and the Magnitude of Inflammatory Activation and Organ Dysfunction in Post-Traumatic Sepsis. *PLoS ONE [Electronic Resource]* 2012;7(12):e5147.
34. Borue X, Lee S, Grove J, Herzog EL, Harris R, Diflo T, et al. Bone marrow-derived cells contribute to epithelial engraftment during wound healing. *Am J Pathol* 2004;165(5):1767-72.
35. Fan Q, Yee CL, Ohyama M, Tock C, Zhang G, Darling TN, et al. Bone marrow-derived keratinocytes are not detected in normal skin and only rarely detected in wounded skin in two different murine models. *Exp Hematol* 2006;34(5):672-9.
36. Harris RG, Herzog EL, Bruscia EM, Grove JE, Van Arnam JS, Krause DS. Lack of a fusion requirement for development of bone marrow-derived epithelia. *Science* 2004;305(5680):90-3.
37. Jeschke MG, Finnerty CC, Herndon DN, Song J, Boehning D, Tompkins RG, et al. Severe injury is associated with insulin resistance, endoplasmic reticulum stress response, and unfolded protein response. *Ann Surg* 2012;255(2):370-8.
38. Verfaillie T, Garg AD, Agostinis P. Targeting ER stress induced apoptosis and inflammation in cancer. *Cancer Lett* 2013;332(2):249-64.
39. Wang S, Kaufman RJ. The impact of the unfolded protein response on human disease. *Journal of Cell Biology* 2012;197(7):857-67.
40. George RL, McGwin G, Jr., Schwacha MG, Metzger J, Cross JM, Chaudry IH, et al. The association between sex and mortality among burn patients as modified by age. *J Burn Care Rehabil* 2005;26(5):416-21.
41. Kerby JD, McGwin G, Jr., George RL, Cross JA, Chaudry IH, Rue LW, 3rd, et al. Sex differences in mortality after burn injury: results of analysis of the National Burn Repository of the American Burn Association. *J Burn Care Res* 2006;27(4):452-6.
42. McGwin G, Jr., George RL, Cross JM, Reiff DA, Chaudry IH, Rue LW, 3rd. Gender differences in mortality following burn injury. *Shock* 2002;18(4):311-5.



- 1
- 2
- 3 43. O'Keefe GE, Hunt JL, Purdue GF. An evaluation of risk factors for mortality after burn trauma and
- 4 the identification of gender-dependent differences in outcomes. *J Am Coll Surg*
- 5 2001;192(2):153-60.
- 6
- 7 44. Frink M, Pape H-C, van Griensven M, Krettek C, Chaudry IH, Hildebrand F. Influence of sex and
- 8 age on mods and cytokines after multiple injuries. *Shock* 2007;27(2):151-6.
- 9
- 10 45. Schroder J, Kahlke V, Book M, Stuber F. Gender differences in sepsis: genetically determined?
- 11 *Shock* 2000;14(3):307-10
- 12
- 13 46. Gregory MS, Duffner LA, Faunce DE, Kovacs EJ. Estrogen mediates the sex difference in post-burn
- 14 immunosuppression. *J Endocrinol* 2000;164(2):129-38.
- 15
- 16 47. Gregory MS, Faunce DE, Duffner LA, Kovacs EJ. Gender difference in cell-mediated immunity
- 17 after thermal injury is mediated, in part, by elevated levels of interleukin-6. *J Leukoc Biol*
- 18 2000;67(3):319-26.
- 19
- 20 48. Kahlke V, Angele MK, Ayala A, Schwacha MG, Cioffi WG, Bland KI, et al. Immune dysfunction
- 21 following trauma-haemorrhage: influence of gender and age. *Cytokine* 2000;12(1):69-77.
- 22
- 23 49. Kahlke V, Angele MK, Schwacha MG, Ayala A, Cioffi WG, Bland KI, et al. Reversal of sexual
- 24 dimorphism in splenic T lymphocyte responses after trauma-hemorrhage with aging. *Am J*
- 25 *Physiol Cell Physiol* 2000;278(3):C509-16.
- 26
- 27 50. Plackett TP, Gamelli RL, Kovacs EJ. Gender-based differences in cytokine production after burn
- 28 injury: a role of interleukin-6. *J Am Coll Surg* 2010;210(1):73-8.
- 29
- 30 51. Croce MA, Fabian TC, Malhotra AK, Bee TK, Miller PR. Does gender difference influence
- 31 outcome? *J Trauma* 2002;53(5):889-94.
- 32
- 33 52. Horton JW, White DJ, Maass DL. Gender-related differences in myocardial inflammatory and
- 34 contractile responses to major burn trauma. *Am J Physiol Heart Circ Physiol*
- 35 2004;286(1):H202-13.
- 36
- 37 53. Mace JE, Park MS, Mora AG, Chung KK, Martini W, White CE, et al. Differential expression of the
- 38 immunoinflammatory response in trauma patients: burn vs. non-burn. *Burns*
- 39 2012;38(4):599-606.
- 40
- 41 54. Verthelyi D. Sex hormones as immunomodulators in health and disease. *Int Immunopharmacol*
- 42 2001;1(6):983-93.
- 43
- 44 55. Scotland RS, Stables MJ, Madalli S, Watson P, Gilroy DW. Sex differences in resident immune cell
- 45 phenotype underlie more efficient acute inflammatory responses in female mice. *Blood*
- 46 2011;118(22):5918-27.
- 47
- 48 56. Sperry JL, Nathens AB, Frankel HL, Vanek SL, Moore EE, Maier RV, et al. Characterization of the
- 49 gender dimorphism after injury and hemorrhagic shock: are hormonal differences
- 50 responsible? *Critical Care Medicine* 2008;36(6):1838-45.
- 51
- 52 57. Ozcelik T. X chromosome inactivation and female predisposition to autoimmunity. *Clin Rev*
- 53 *Allergy Immunol* 2008;34(3):348-51.
- 54
- 55 58. Nicol T, Vernon-Roberts B, Quantock DC. Effect of orchidectomy and ovariectomy on survival
- 56 against lethal infections in mice. *Nature* 1966;211(5053):1091-2.
- 57
- 58 59. Paavonen T. Hormonal regulation of immune responses. *Ann Med* 1994;26(4):255-8.
- 59
- 60 60. Rettew JA, Huet YM, Marriott I. Estrogens augment cell surface TLR4 expression on murine
- macrophages and regulate sepsis susceptibility in vivo. *Endocrinology* 2009;150(8):3877-84.
- 61
- 62 61. Libert C, Dejager L, Pinheiro I. The X chromosome in immune functions: when a chromosome
- makes the difference. *Nat Rev Immunol* 2010;10(8):594-604.
- 63
- 64 62. Pinheiro I, Dejager L, Libert C. X-chromosome-located microRNAs in immunity: might they
- explain male/female differences? The X chromosome-genomic context may affect X-located
- miRNAs and downstream signaling, thereby contributing to the enhanced immune response
- of females. *Bioessays* 2011;33(11):791-802.



1  
2  
3  
4  
5  
6  
7  
8  
9  
10  
11  
12  
13  
14  
15  
16  
17  
18  
19  
20  
21  
22  
23  
24  
25  
26  
27  
28  
29  
30  
31  
32  
33  
34  
35  
36  
37  
38  
39  
40  
41  
42  
43  
44  
45  
46  
47  
48  
49  
50  
51  
52  
53  
54  
55  
56  
57  
58  
59  
60

For peer review only

1  
2  
3  
4  
5  
6  
7 **Burn injury, gender and cancer risk: population-based cohort study using data from Scotland and**  
8 **Western Australia**

9 Janine M. Duke,<sup>1</sup> Jacqui Bauer,<sup>2</sup> Mark W. Fear,<sup>1</sup> Suzanne Rea,<sup>1,3</sup> Fiona M. Wood,<sup>1,3,4</sup> James Boyd  
10  
11 <sup>2</sup>

- 12 1. Burn Injury Research Unit, School of Surgery, University of Western Australia, Western  
13 Australia
- 14 2. Population Health Research Network, Centre for Data Linkage, Curtin University, Western  
15 Australia
- 16 3. Burns Service of Western Australia, Royal Perth Hospital and Princess Margaret Hospital,  
17 Western Australia
- 18 4. Fiona Wood Foundation, Western Australia

19  
20  
21  
22  
23  
24  
25 **Authors:**

- 26 1. Janine M. Duke  
27 Associate Professor

28  
29  
30  
31 Burn Injury Research Unit, School of Surgery, Faculty of Medicine, Dentistry and Health Sciences, The  
32 University of Western Australia, M318 35 Stirling Highway, Crawley, 6009, Western Australia

- 33 2. Jacqui Bauer  
34 Research Associate

35  
36  
37  
38 Population Health Research Network, Centre for Data Linkage, Curtin University, Perth, 6845,  
39 Western Australia

- 40 3. Mark W. Fear  
41 Associate Professor

42  
43  
44  
45 Burn Injury Research Unit, School of Surgery, Faculty of Medicine, Dentistry and Health Sciences, The  
46 University of Western Australia, M318 35 Stirling Highway, Crawley, 6009, Western Australia

- 47 4. Suzanne Rea  
48 Professor, Burns Surgeon

49  
50  
51  
52 Burns Service of Western Australia, Royal Perth Hospital and Princess Margaret Hospital, Perth 6000  
53  
54  
55  
56  
57  
58  
59  
60

1  
2  
3  
4  
5  
6  
7 Burn Injury Research Unit, School of Surgery, Faculty of Medicine, Dentistry and Health Sciences, The  
8 University of Western Australia, M318 35 Stirling Highway, Crawley, 6009, Western Australia  
9

10 5. Fiona M. Wood

11 Professor, Burns Surgeon, Director of Burns Service of Western Australia  
12

13 Burn Injury Research Unit, School of Surgery, Faculty of Medicine, Dentistry and Health Sciences, The  
14 University of Western Australia, M318 35 Stirling Highway, Crawley, 6009, Western Australia  
15

16 Burns Service of Western Australia, Royal Perth Hospital, Perth, Western Australia  
17

18 Fiona Wood Foundation, Perth, Western Australia  
19

20 6. James Boyd

21 Associate Professor  
22

23  
24 Population Health Research Network, Centre for Data Linkage, Curtin University, Perth, 6845,  
25 Western Australia  
26  
27

28  
29 **\*Address for correspondence:**  
30

31 Associate Professor Janine M. Duke  
32

33 Email: [janine.duke@uwa.edu.au](mailto:janine.duke@uwa.edu.au)  
34  
35  
36  
37  
38  
39  
40  
41  
42  
43  
44  
45  
46  
47  
48  
49  
50  
51  
52  
53  
54  
55  
56  
57  
58  
59  
60

1  
2  
3  
4  
5  
6  
7 **Funding support:** This research received no specific funding. Project data costs were supported by  
8 an Australian National Health and Medical Research Council research grant and a Raine Medical  
9 Research Foundation Priming grant. J.M.D. Senior Research Fellowship is supported by Woodside  
10 corporate sponsorship via the Fiona Wood Foundation.  
11

12  
13 **Conflict of Interest Statement:** All authors declare: no support from any organisation for the  
14 submitted work; no financial relationships with any organisations that might have an interest in the  
15 submitted work in the previous three years, no other relationships or activities that could appear to  
16 have influenced the submitted work.  
17

18  
19 **Article Word Count (Text only, excludes Abstract, References):** 3,507  
20

21 **Number of Tables:** 4  
22

23 **Data sharing statement:** All authors have had access to the data  
24

25 The Corresponding Author has the right to grant on behalf of all authors and does grant on behalf of  
26 all authors, an exclusive licence (or non-exclusive for government employees) on a worldwide basis  
27 to the BMJ Publishing Group Ltd to permit this article (if accepted) to be published in BMJ editions  
28 and any other BMJPGJL products and sublicences such use and exploit all subsidiary rights, as set out  
29 in our licence.  
30

31 **Contributions:**

32  
33 Janine Duke: Planning, conduct and reporting  
34

35 James Boyd: Planning, conduct and reporting  
36

37 Jacqui Bauer: Conduct and reporting  
38

39 Mark Fear: Reporting  
40

41 Suzanne Rea: Reporting  
42

43 Fiona Wood: Reporting  
44

45 **Guarantors:**

46 Janine Duke  
47

48 James Boyd  
49  
50  
51  
52  
53  
54  
55  
56  
57  
58  
59  
60

1  
2  
3  
4  
5  
6  
7 **Article Focus**

- 8  
9  
10  
11
- Burn injury not only affects the skin but also has other systemic effects
  - Inflammatory and immune response to burns may mediate cancer risk
  - Gender differences in cancer risk after burn injury may be related to the immune response

12  
13 **Key messages**

- 14  
15  
16
- Burn injury can have impacts on longer term health
  - Increased risk of some cancers post-burn injury is greater in females than males

17  
18 **Strengths and Limitations**

- 19  
20  
21  
22  
23  
24  
25  
26  
27  
28  
29  
30  
31  
32  
33  
34  
35  
36  
37  
38  
39  
40  
41  
42  
43  
44  
45  
46  
47  
48  
49  
50  
51  
52  
53  
54  
55  
56  
57  
58  
59  
60
- Population-level linked administrative data minimises issues of selection and reporting bias, and loss to follow-up
  - Consistency of results using population-level data from two patient populations provides greater support for link between burn injury and some cancers
  - Unable to examine impact of burn severity on cancer risk due to lack of available data

**Burn injury, gender and cancer risk: population-based cohort study using data from Scotland and Western Australia**

**Abstract**

**Objective:** To investigate risk of cancer and potential gender effects in persons hospitalised with burn injury.

**Design:** Population-based retrospective cohort study using record-linkage systems in Scotland and Western Australia

**Subjects:** Records of 37,890 and 23,450 persons admitted with a burn injury in Scotland and Western Australia, respectively, from 1983 to 2008. De-identified extraction of all linked hospital morbidity records, mortality and cancer records were provided by the Information Service Division Scotland and the Western Australian Data Linkage Service.

**Main outcome measures:** Total and gender specific numbers of observed and expected cases of total (all-sites) cause and site-specific cancers and standardised incidence ratios.

**Results:** From 1983-2008, for female burn survivors there was a greater number of observed versus expected notifications of all-cause cancer with 1011 (standardised incidence ratio (SIR), 95% confidence interval (CI): 1.3, 1.2 to 1.4) and 244 (SIR, 95%CI: 1.12, 1.05 to 1.30), respectively, for Scotland and Western Australia. No statistically significant difference in all-cause total (all-sites) cancer risk was found for males. Significant excesses in observed cancers amongst burn survivors (combined gender) in Scotland and Western Australian were found for buccal cavity, liver, larynx and respiratory tract, and for cancers of the female genital tract. Consistent significant trends were found which showed an excess of cancer notifications for a range of selected site specific cancers, including buccal cavity, liver, larynx and respiratory tract, with an elevated and more widespread increase amongst female burn patients.

**Conclusions:** Results from the Scotland data confirmed the increased risk of 'all-cause' total (all-sites) cancer previously observed amongst female burn survivors in Western Australia. The gender dimorphism observed in this study may be related to the role of gender in the immune response to burn injury. More research is required to understand the underlying mechanism(s) that may link burn injury with an increased risk of some cancers.

## Burn injury, gender and cancer risk: population-based cohort study using data from Scotland and Western Australia

### 1. Introduction

The burden of burn injury is a significant issue, not only in terms of the acute care perspective but also the chronic health effects resulting from both the injury event and the subsequent treatments. While burns predominantly affect the skin, burns are associated with significant systemic effects<sup>1-3</sup>, depressed immune functioning<sup>4-8</sup> and prolonged periods of systemic catabolism and hypermetabolism.<sup>9</sup> Prompted by a clinical scenario of a diagnosis of hepatocellular carcinoma in a young male burn patient,<sup>10</sup> and the potential for malignancy after burn, an initial study of burn injury and total (all-sites) all-cause cancer risk was undertaken.<sup>11</sup> Results of this study demonstrated a gender effect with female burn survivors having an increased risk of all-cause cancer.

This previous study of burn injury and cancer risk used population-based data linked by the Western Australian Data Linkage System (WADLS).<sup>12</sup> Data linkage in Western Australia provides one of only a handful of information-rich environments worldwide that have been constructed from the linkage of multiple, large, population-based, administrative datasets. The WADLS meets international best practice standards, determined by experiences from the Oxford Record Linkage Study, Scottish Record Linkage System, Rochester Epidemiology Project and the Manitoba Centre for Health Policy.<sup>13</sup> Western Australia has a population of approximately 2.2 million, and as such, did not support detailed gender and site-specific cancer incidence assessments with adequate statistical power. While the WADLS has systematically linked datasets of Western Australians since the 1970s, other Australian States and Territories have only recently established record linkage systems and were not able to support this study. To extend the population base and enable further detailed examination of the observed gender effect and site-specific cancer incidence, approval was sought to access the Scottish population-based record linkage system, the Information Service Division (ISD) Scotland,<sup>14</sup> that has routinely linked health data since the 1980s.

Results of our initial study demonstrated no significant risk of developing any form (all-sites) of cancer (combined gender) after burn injury; however, a gender effect with female burn survivors having an increased risk of any form of cancer was found.<sup>11</sup> In contrast to our results, a Swedish population-based study<sup>12</sup> of linked burn patient hospitalisation records and cancer registrations reported the risk of developing any form of cancer, for combined gender, was increased (SIR, 95%CI: 1.11, 1.06-1.16), with the risk of lung cancer also significantly increased (SIR, 95%CI: 1.39, 1.21-1.59). However, a Danish study of burn patients<sup>13</sup> found no significant increases in cancer (combined gender) for all malignant neoplasms including all skin cancers (SIR, 95%CI: 0.99, 0.93-1.06).

1  
2  
3  
4  
5  
6  
7 This previous study of burn injury and cancer risk used population-based data linked by the Western  
8 Australian Data Linkage System (WADLS).<sup>14</sup> Western Australia has a population of approximately 2.2  
9 million, and as such, did not support detailed gender and site-specific cancer incidence assessments  
10 with adequate statistical power. While the WADLS has linked datasets of Western Australians since  
11 the 1970s, other Australian States have only recently established record linkage systems and were  
12 not able to support this study. To extend the population-base and enable further detailed  
13 examination of the observed gender effect and site specific cancer incidence, approval was sought  
14 to access the Scottish population-based record linkage system, the Information Service Division (ISD)  
15 Scotland,<sup>15</sup> that has routinely linked health data since the 1980s.

16  
17  
18  
19  
20 This paper reports a retrospective longitudinal study to explore cancer risk after burn injury using  
21 linked hospital morbidity, cancer and death data of persons hospitalised for burn injury in both  
22 Western Australia and Scotland. The study aimed to, firstly, confirm the increased risk of ~~all-~~  
23 ~~cause~~ total (all-sites) cancer observed in the preliminary Western Australian study of female burn  
24 survivors using the Scottish data; and, secondly, examine site-specific cancer risk amongst survivors  
25 of burn injury.  
26  
27

## 28 **2. Methods**

29  
30 Study data were obtained from the Western Australian Data Linkage Service (WADLS)<sup>12-14</sup> and the  
31 Information and Services Division (ISD Scotland) of the National Health Service National Services  
32 Scotland<sup>13,15</sup> with approval from Curtin University, the Western Australia Department of Health  
33 Human Research Ethics Committees and the NHS National Services Scotland Privacy Advisory  
34 Committee. The WADLS and ISD Scotland are validated record linkage systems that routinely link  
35 administrative health data from core datasets for the entire population of Western Australia and  
36 Scotland, respectively.  
37  
38  
39

40 An index burn injury was defined as the first hospital admission with a burn injury using primary and  
41 additional diagnosis International Classification of Diseases (ICD) codes 940-949 (ICD9) and T20-T31  
42 (ICD10). A de-identified extraction of all linked hospital morbidity records (Hospital Morbidity Data  
43 System (HMDS), mortality (Death Register, Western Australia) and cancer records (Western Australia  
44 Cancer Registry (WACR)) for all persons admitted to hospital with an index burn injury in Western  
45 Australia, for the period 1 January 1983 to 31 December 2008, was performed by WADLS.<sup>14,16</sup> A  
46 corresponding de-identified extraction of all linked hospital morbidity records (Scottish Morbidity  
47 Records (SMR) 01), cancer registrations (SMR06) and death records (General Register Office for  
48 Scotland (GROS)) using the same burn cohort definition was undertaken by ISD Scotland. Hospital  
49  
50  
51  
52  
53  
54  
55  
56  
57  
58  
59  
60



1  
2  
3  
4  
5  
6  
7 admissions data items included age at admission, gender, admission date, separation [\(or discharge\)](#)  
8 date, principal and additional diagnoses and external cause of injury.

9  
10 The Western Australia Cancer Registry (WACR) was established in 1981 and is a population-based  
11 cancer registry based on mandatory notification of cancers from pathologists, haematologists and  
12 radiation oncologist, and cancer information from death records.<sup>4517</sup> ~~Amendments to the Health  
13 (Notification of Cancer) Regulations in 1996 required from that time, notifications of all in situ, non-  
14 melanoma skin cancers other than basal cell and squamous cell carcinomas, and, all other invasive  
15 malignancies and benign Central Nervous System tumours.~~<sup>45</sup> Malignant cancers are coded according  
16 to a modified Australian version of the International Classification of Diseases, Tenth Revision  
17 (ICD10-AM) and International Classification of Diseases for Oncology (ICD-O-3).

18  
19 The Scotland Cancer Registry (SMR06) has recorded all incident cancers in Scotland from 1958, and  
20 since 1997 registration has been centralised at ISD Scotland.<sup>4618</sup> The registry is responsible for the  
21 collection of information on all new cases of primary malignant neoplasms, carcinoma in situ  
22 (including grade III intra-epithelial neoplasia), neoplasms of uncertain behaviour and (since 1 January  
23 2000) benign brain and spinal cord tumours arising in residents of Scotland. Data quality is  
24 monitored using routine indicators, computer validation and ad hoc studies of data accuracy and  
25 completeness of ascertainment.<sup>17-18 19 20</sup> The Scottish cancer notifications are coded using the  
26 International Classification of Diseases (ICD) and the International Classification of Diseases for  
27 Oncology (ICD-O).

28  
29 Methods for analysis have been previously published.<sup>11</sup> An incident cancer was defined as a cancer  
30 diagnosis notification (C00-C96, excluding C44) after hospital admission for index burn injury.  
31 Analysis was restricted to malignant neoplasm notifications (C00-C96, excluding C44) for which ~~all-  
32 cause-total (all-sites)~~ and site-specific cancer incident rates were provided by WACR and ISD Scotland  
33 for respective populations. Records were excluded from the analysis if the date of cancer diagnosis  
34 was prior to date of discharge for index burn hospitalisation. When a record was identified as having  
35 more than one malignant neoplasm notification, each neoplasm was counted as an individual  
36 record, however, if multiple tumours of the skin (C43) with identical morphological characteristics  
37 (that is, the first three digits ICD-O-3 morphology code) were identified, they were recorded only  
38 once. Gender and age-specific cancer (total C00-C96, excluding C44) incident rates for the Western  
39 Australian and Scottish populations were pooled for the calendar periods 1983-1988, 1989-1993,  
40 1994-1998, 1999-2003 and 2004-2008 to allow for changes in population cancer incidence during  
41 the study period.  
42  
43  
44  
45  
46  
47  
48  
49  
50  
51  
52  
53  
54  
55  
56  
57  
58  
59  
60

1  
2  
3  
4  
5  
6  
7 For the determination of incident rates, the calculation of person-years began on the day of final  
8 hospital discharge for the index burn admission and the study observation period continued until  
9 date of cancer diagnosis, death, or 31<sup>st</sup> December 2008, whichever occurred first. The observed  
10 numbers of cases of cancer and person-years at risk were calculated by age (5-year age groups),  
11 gender and calendar period (1983-1988, 1989-1993, 1994-1998, 1999-2003 and 2004-2008). The  
12 expected numbers of cancer cases were estimated by multiplying the specific number of person  
13 years per category by the corresponding incidence of cancer in Western Australia, Scotland, and  
14 combined cancer incidence rates, provided by WACR and ISD Scotland. The Standardised Incident  
15 Ratios (SIRs) were calculated by dividing the observed number of cases by the number expected. <sup>21 22</sup>  
16 The 95% confidence intervals (95%CI) were defined under the assumption that the observed number  
17 of cancers followed the Poisson distribution. <sup>4923</sup>

18  
19 Separate SIR analyses for ~~total (all-sites) all-cause~~ and site-specific cancers were conducted using  
20 country specific data for respective burn patient cohorts (all burn depth) for cohorts hospitalised  
21 from 1983-2008; ~~total (all-sites) all-cause~~ SIRs repeated for sub-cohorts of burn admissions from  
22 1983-1987, with optimum follow-up time. To further explore the gender impact of burn injury on  
23 cancer risk, ~~total (all-sites) all-cause~~ cancer SIR analyses were repeated on age-restricted sub-cohorts  
24 classified to reflect reproductive age at admission for burn injury: <15 years; 15-49 years; and, ≥50  
25 years. All statistical analyses were performed using Stata statistical software V 11 (StataCorp LP,  
26 College Station, Tex).

### 34 3. Results

35  
36 In Scotland from 1983-2008, there were a total of 37,890 persons hospitalised for an index burn-  
37 related injury. After exclusion of those with a history of cancer prior to separation date or death  
38 during hospital admission for burn, a total of 37,506 patients were included in the analysis. There  
39 were 2,005 patients with a first cancer notification after date of separation for burn injury  
40 hospitalisation, and with inclusion of multiple malignancies, 2,260 cancer notifications were included  
41 in the standardised incident ratio analyses as independent observations. Characteristics of the  
42 Western Australia and Scotland cohorts are presented in Table 1.

43  
44 As previously reported, in Western Australia from 1983 to 2008, there were 23,450 hospital index  
45 admissions for burn-related injury.<sup>14</sup> After exclusion of records with a history of cancer prior to  
46 separation date or death during hospital admission for burn, a total of 22,705 patient records were  
47 included in the analysis.<sup>11</sup> There were 673 patients with a first cancer notification after date of  
48 separation for burn injury hospitalisation, and with inclusion of multiple malignancies, 759 cancer  
49 notifications were included in the standardised incident ratio analyses as independent observations.

1  
2  
3  
4  
5  
6  
7  
8  
9  
10  
11  
12  
13  
14  
15  
16  
17  
18  
19  
20  
21  
22  
23  
24  
25  
26  
27  
28  
29  
30  
31  
32  
33  
34  
35  
36  
37  
38  
39  
40  
41  
42  
43  
44  
45  
46  
47  
48  
49  
50  
51  
52  
53  
54  
55  
56  
57  
58  
59  
60

~~In Scotland from 1983-2008, there were a total of 37,890 persons hospitalised for an index burn-related injury. After exclusion of those with a history of cancer prior to separation date or death during hospital admission for burn, a total of 37,506 patients were included in the analysis. There were 2,005 patients with a first cancer notification after date of separation for burn injury hospitalisation, and with inclusion of multiple malignancies, 2,260 cancer notifications were included in the standardised incident ratio analyses as independent observations. Characteristics of the Western Australia and Scotland cohorts are presented in Table 1.~~

~~For the Scottish cohort of burn injury patients (combined gender) there was marginal but significant difference (SIR, 95%CI: 1.09, 1.05-1.10) in the overall risk of cancer for persons with a burn injury hospitalisation for the period 1983 to 2008, compared with the general population of Scotland. While a significant increase of 30% in cancer risk was estimated for females there was no difference in cancer risk for males, when compared with the general population of Scotland (refer to Table 2). For the sub-cohort of burn injury patients 1983-1988, the total observed number of cases of cancer (n=838) was statistically significantly lower than expected (n=953.4) with SIR (95%CI) of 0.88 (0.82 to 0.94), with males having a statistically significantly lower number of cases observed than expected. Refer to Table 2 for gender specific SIRs for total (all-sites) cancer for Scotland and Western Australian burn patients, hospitalised during 1983-1988 and 1983-2008.<sup>11</sup>~~

The Western Australia cohort (1983-2008; combined gender) was followed for a total of 283,306 person-years, with mean follow-up time of 12.3 years (range: >0 – 25.9 years). Mean follow-up time for those with a cancer notification was 9.4 years (range: >0 – 25.4) and for those with no cancer notification, 12.4 years (range: >0 – 25.9). The Scotland cohort (1983-2008; combined gender) was followed for a total of 474,489 person-years, with mean follow-up time of 12.6 years (range: 0 -26.0 years). Mean follow-up time for those with a cancer notification was 9.4 years (range: >0-25.8) and for those with no cancer notification, 12.7 years (range: >0-26.0).

~~For the Scottish cohort of burn injury patients (combined gender) there was marginal but significant difference (SIR, 95%CI: 1.09, 1.05-1.10) in the overall risk of cancer for persons with a burn injury hospitalisation for the period 1983 to 2008, compared with the general population of Scotland. While a significant increase of 30% in cancer risk was estimated for females there was no difference in cancer risk for males, when compared with the general population of Scotland (refer to Table 2). For the sub-cohort of burn injury patients 1983-1988, the total observed number of cases of cancer (n=838) was statistically significantly lower than expected (n=953.4) with SIR (95%CI) of 0.88 (0.82 to 0.94), with males having a statistically significantly lower number of cases observed than expected. Refer to Table 2 for gender specific SIRs for all-cause cancer for Scotland and Western Australian burn patients, hospitalised during 1983-1988 and 1983-2008.<sup>11</sup>~~

1  
2  
3  
4  
5  
6  
7 Female genital cancers were grouped due to the small numbers of observed cancers in sub-groups in  
8 the Western Australian data and unstable SIR results. Statistically significant increases in observed  
9 genital (combined) cancers for female burn patients in both Western Australia and Scotland were  
10 found. The increased breast cancer incidence was statistically significant amongst female burn  
11 survivors in Scotland. Statistically significant increases in cancer incidence for combined gender for  
12 both Western Australia and Scottish data were observed for cancers of the buccal cavity, liver and  
13 respiratory tract. Refer to Table 3 for gender and site-specific cancer SIRs. For each of these cancers,  
14 female burn survivors in both Western Australia and Scotland had higher incidence than males when  
15 compared with respective general population data. For the majority of site-specific cancers selected,  
16 female burn survivors in both Western Australia and Scotland had higher numbers of observed  
17 cancers than expected, with SIRs of similar magnitude. However, SIR results for Scottish data  
18 reached statistical significance, reflecting the larger population-base and respective higher number  
19 of cancer notifications.  
20  
21

22 Table 4 presents an SIR analyses of ~~total (all-sites) all-cause~~ cancer risk repeated on age-restricted  
23 sub-cohorts, classified to reflect reproductive age (<15 years; 15-49 years; and, ≥50 years) at  
24 admission for burn injury. For males in both WA and Scotland, no statistically significant differences  
25 were found across the three age groups. For female burn survivors in Scotland, the observed  
26 numbers of cancers (~~total all-sites) (all-cause)~~ exceeded that expected for each of the three age  
27 groups, with statistically significant results observed for the age groups 15-49, and 50 years and  
28 older. In the Western Australia data, excess cancers were observed for those younger than 15 years  
29 and for those 50 years and older, with statistically significance reached for the older age group; for  
30 females 15-49 years at burn injury, no difference in observed and expected ~~total (all-sites) all-cause~~  
31 cancer was found.  
32  
33  
34  
35  
36  
37  
38  
39

#### 40 4. Discussion

##### 41 4.1 Methodological Issues

42  
43 ~~Data linkage is a technique which creates links within and between data sources, identifying all the~~  
44 ~~information that relates to the same person, place or event. In addition, when population-level~~  
45 ~~administrative data are used, data linkage minimises issues of selection and reporting bias, as well as~~  
46 ~~loss to follow up. Data quality of the Western Australia and Scottish Cancer Registers<sup>15-17-18</sup> and~~  
47 ~~hospital morbidity datasets<sup>20-21</sup> are assessed continually for both accuracy and quality; however,~~  
48 ~~potential for misclassification bias may exist. The coding system changed from ICD-9 to ICD-10 in~~  
49 ~~both Western Australia and Scotland during the study period for death and hospital admissions data.~~  
50  
51  
52  
53  
54  
55  
56  
57  
58  
59  
60

1  
2  
3  
4  
5  
6  
7  
8  
9  
10  
11  
12  
13  
14  
15  
16  
17  
18  
19  
20  
21  
22  
23  
24  
25  
26  
27  
28  
29  
30  
31  
32  
33  
34  
35  
36  
37  
38  
39  
40  
41  
42  
43  
44  
45  
46  
47  
48  
49  
50  
51  
52  
53  
54  
55  
56  
57  
58  
59  
60

~~Data of all index burn hospitalisations in Western Australia and Scotland from 1983 to 2008 were analysed with follow up time from discharge date, allowing for exclusion of prevalent cancers to support temporality of burn exposure and incident cancer. Cancer diagnoses from cancer registries in Western Australia and Scotland were independent of the record of burn injury in the respective hospital morbidity datasets. Minor burns treated in emergency departments were not included in the study. The burn patient cohorts under study are part of the respective reference populations, and as such, this may have a small diluting effect in the standardised incidence ratios. Western Australia has a population of approximately 2.2 million, and as such, did not support detailed gender and site specific cancer incidence assessments. Using parallel datasets from Scotland, of population approximately 5.5 million, allowed examination of the consistency of results and trends across the populations.~~

~~When population-level administrative data are used, data linkage minimises issues of selection and reporting bias, as well as loss to follow-up. Data quality of the Western Australia and Scottish Cancer Registers<sup>17 19 20</sup> and hospital morbidity datasets<sup>24 25</sup> are assessed continually for both accuracy and quality. Data of all index burn hospitalisations in Western Australia and Scotland from 1983 to 2008 were analysed with follow-up time from discharge date, allowing for exclusion of prevalent cancers to support temporality of burn exposure and incident cancer. Cancer diagnoses from cancer registries in Western Australia and Scotland were independent of the record of burn injury in the respective hospital morbidity datasets. Minor burns treated in emergency departments were not included in the study. The burn patient cohorts under study are part of the respective reference populations, and as such, this may have a small diluting effect in the standardised incidence ratios. Using parallel datasets from Western Australia and Scotland, of populations 2.2 million and 5.5 million, respectively, allowed examination of the consistency of results and trends across the populations.~~

The Western Australia hospital morbidity data records the principal diagnosis and up to 20 additional diagnosis fields, whereas, the Scottish morbidity data includes the principal diagnosis and 5 additional diagnosis fields. ~~Consequent to the reduced number of additional diagnosis fields in the Scottish data, there was an absence of recorded supplementary total body surface area burned (TBSA%) data (ICD9 946; ICD10 T31) and greater use of ICD codes for burns to multiple regions of the body (ICD9 946; ICD10 T29) rather than individual anatomic burn sites, reflected in Table 1. This limited both SIR analyses restricted to more severe burns of TBSA 20% or greater and incident rate ratio analysis to examine the effects of severity of burn injury (burn depth and TBSA %). Previous SIR analyses of total (all-sites) cancer risk in Western Australia showed similar trends in results for all burn patients (severe and non-severe).<sup>11</sup> The effects of this reduction in the number of available~~

1  
2  
3  
4  
5  
6  
7 additional diagnosis fields included the more frequent use in the Scottish data of ICD codes for burns  
8 to multiple regions of the body (ICD9 946; ICD10 T29) rather than recording of multiple individual  
9 anatomic burn sites, reflected in Table 1; and, an absence of consistently recorded supplementary  
10 ICD (ICD9 946; ICD10 T31) data to describe total body surface area burned (TBSA%). This limited our  
11 capacity to undertake both SIR analyses restricted to more severe burns of TBSA 20% or greater and  
12 incident rate ratio analysis to examine the effects of severity of burn injury (burn depth and TBSA%)  
13 using the least exposed group as reference (instead of the general population of Scotland) and  
14 confirm previous results. Approximately 90% of persons hospitalised in Western Australia had non-  
15 severe burn injury (TBSA<20%).<sup>14</sup> Previous SIR analyses of all cause cancer risk in Western Australia  
16 showed similar trends in results for all burn patients (severe and non-severe) and those hospitalised  
17 for severe burn; however, for females hospitalised with severe burn there was a statistically  
18 significant increase of 31% in all cause cancer notifications.<sup>11</sup>

19  
20  
21  
22  
23  
24 The data analysed in this study are based on linked data from population registers to compare  
25 observed cancer incidence in burn patient cohorts with that expected using general population  
26 cancer rates adjusting for gender, age and calendar period population changes. Although this study  
27 had a follow-up period of up to 26 years from the date of separation for admission for burn injury,  
28 the follow up period for many patients may not have provided sufficient observation time to enable  
29 identification of all potential malignancies, given the long latency period for many cancers. Further  
30 burn injury research is planned with comparison cohorts (non-burn trauma, no injury), using  
31 incidence rate ratio analyses to explore injury and patient (including lifestyle factors such as smoking  
32 and alcohol) factors associated with the observed cancer risk.

#### 33 34 35 36 37 **4.2 Findings**

38  
39 Analysis of ISD Scotland data confirmed the results of our previous study: a statistically significant  
40 increase in all-cause total (all-sites) cancer risk for female burn survivors with males experiencing no  
41 difference. The site specific analyses clearly showed statistically significant increases in the number  
42 of observed cancers for combined gender in both the Western Australia and Scottish data for the  
43 buccal cavity, larynx, liver, respiratory tract and oesophagus. There was also a general trend for  
44 increased cancer risk for a number for most of the selected types of cancers for females and  
45 statistically significant increases in female genital cancers. Sub group analyses, defined crudely by  
46 reproductive age, did not elucidate any clear patterns of the influence of oestrogen on cancer  
47 incidence, with female burn survivors in Scotland showing increased risk across all age groups. For  
48 female burn survivors in WA, an increased risk for all-cause total (all-sites) cancer was found for  
49 those younger than 15 years (pre-pubescent) and 50 years and older (post-menopausal). The lack of  
50 gender difference for the sub-cohort of burn patients hospitalised in Scotland 1983-88 for total (all-  
51  
52  
53  
54  
55  
56  
57  
58  
59  
60

1  
2  
3  
4  
5  
6  
7 sites) cancer risk is difficult to explain. Possible reasons may include that female burn patients had  
8 less comorbidity and / or had better lifestyle factors than females hospitalised for burns during the  
9 remainder of the study period.

10  
11  
12  
13 The site-specific analyses showed ~~that whilst~~ statistically significant increases in female genital  
14 ~~cancers\_ were found, there was also a general trend for increased cancer risk for most of the~~  
15 ~~selected types of cancers for females. A general trend of excess cancers amongst female burn~~  
16 ~~patients across a number of the site-specific cancers examined was also found; however, these~~  
17 ~~excesses did not always reach statistical significance, possibly due to small numbers. Whilst~~  
18 ~~lymphomas have also been reported in association with immunosuppression,<sup>26 27</sup> statistically~~  
19 ~~significant results were found only for Western Australian female burn patients. Statistically~~  
20 ~~significant increases in the number of observed cancers for combined gender were found in both the~~  
21 ~~Western Australia and Scottish data for the buccal cavity, larynx, liver, respiratory tract and~~  
22 ~~oesophagus. These results are similar to those found in a Danish study<sup>22</sup> and may be related to~~  
23 ~~tobacco or alcohol use amongst this patient population. However, it would be expected that~~  
24 ~~inhalation injury may also increase the cancer risk of the upper and lower respiratory tract, and in~~  
25 ~~the case of the diagnosis of hepatocellular cancer in a young male (12 years of age) burn patient in~~  
26 ~~Western Australia,<sup>49</sup> tobacco or alcohol use would be most unlikely attributable agents.~~  
27 ~~Interestingly, the results of no increase in skin melanoma risk after burn injury in this study support~~  
28 ~~findings of other population-based studies.<sup>22-23</sup>~~

29  
30  
31  
32 Statistically significant increases in the number of observed cancers for combined gender were  
33 found in both the Western Australia and Scottish data for the buccal cavity, larynx, liver and  
34 respiratory tract. These results are similar to those found in a Danish study<sup>13</sup> and may be related to  
35 tobacco or alcohol use amongst this patient population. However, it would be expected that  
36 inhalation injury may also increase the cancer risk of the upper and lower respiratory tract, and in  
37 the case of the diagnosis of hepatocellular cancer in a young male (12 years of age) burn patient in  
38 Western Australia,<sup>10</sup> tobacco or alcohol use would be most unlikely attributable agents.  
39 Interestingly, the results of no increase in skin melanoma risk after burn injury in this study support  
40 findings of other population-based studies.<sup>12 13</sup>

41  
42  
43  
44  
45  
46  
47  
48  
49 An alternative explanation for this increased incidence in cancer post-burn may lie in the significant  
50 impact a burn injury has on the immune system, or the sustained oxidative and metabolic stress that  
51 are integral to the injury response. While burn injury predominantly affects the skin, it has been  
52 shown to cause significant depression of both humoral and cell-mediated immunity (CMI),<sup>7 24-25 28 29</sup>  
53 sustained elevated levels of oxidative stress<sup>26-27 30 31</sup> and prolonged elevation of hyper-metabolic and  
54  
55  
56  
57  
58  
59  
60

1  
2  
3  
4  
5  
6  
7 stress hormone levels.<sup>28-29 32 33</sup> These effects have been demonstrated to persist for up to 3 years  
8 post-injury and can lead to long-term systemic impacts on other organs of the body.<sup>1 2 39-34-38</sup> Severe  
9 burn injury has been demonstrated to induce endoplasmic reticulum (ER) stress, in particular, in the  
10 liver.<sup>35-39</sup> ER stress is a stress-response that initially facilitates cell survival but can switch to a pro-  
11 apoptotic signal with prolonged stress.<sup>35-36 39 40</sup> However, it has also been shown that the ER stress  
12 response can become maladaptive, facilitating adaptation to hypoxic environments and promoting  
13 tumour growth.<sup>36-37 40 41</sup> It is plausible that the array of host responses combined with the impact of  
14 the injury, therefore, creates an environment of increased susceptibility to cancer.

15  
16  
17  
18 In addition to the observed increase in some of the selected site-specific cancers, the data support  
19 evidence for a gender dimorphism (a systematic difference between individuals of different sex in  
20 the same species) in the response to burn injury. After burn injury, gender has been shown to be an  
21 important factor with respect to poorer outcomes for mortality<sup>38-41 42-45</sup> and improved prognosis for  
22 multiple organ dysfunction syndrome,<sup>42-46</sup> and sepsis,<sup>43-47</sup> for females compared to males. Similar  
23 gender-based differences have also been reported in animal studies of burn injury.<sup>44-48 48-52</sup>

24  
25  
26  
27 The impact of gender with respect to outcomes after burn injury is largely thought to stem from  
28 well-established differences in immune biology. There is a substantial volume of published literature  
29 to support a gender dimorphism in the immune response<sup>49-52 53-56</sup> and sepsis<sup>43 47</sup> following injury  
30 that have impacts on health and mortality.<sup>39-48</sup> The majority of these studies support a more efficient  
31 and effective innate and adaptive immune responses in females, leading to more rapid clearance of  
32 infectious organisms driven by tissue resident cell populations.<sup>53-57</sup> This 'advantageous' response  
33 reduces the risk of infection in females compared to males<sup>53-54 57 58</sup> but leads to elevated risk of  
34 autoimmune disease.<sup>55-59</sup> This dimorphism was thought to arise largely due to the impact of  
35 oestrogen on immune function.<sup>56-57 60 61</sup> However, recent papers have demonstrated these  
36 differences are not completely ablated by ovariectomy (in animal models)<sup>53-57</sup> and others have  
37 shown that oestrogen can be deleterious to the immune response.<sup>58-62</sup> This suggests a role of other  
38 mediators, most likely expressed on the X-chromosome, in the maintenance of the differential  
39 immune response.<sup>59-60 63 64</sup> The evidence for gender differences in the immune response, both to  
40 thermal and other trauma, and its impact on outcomes is substantial. Here, the evidence of  
41 increased cancer incidence in selected types of cancer after burn injury, with a greater effect in  
42 females, suggests the systemic immune response to burn injury may be a mediator of cancer  
43 susceptibility.

## 51 52 53 54 55 56 57 58 59 60

### 5. Conclusion



1  
2  
3  
4  
5  
6  
7 Using population-based linked data of all burn patients in both Western Australia and Scotland,  
8 consistent trends were found in excesses in cancer notifications for a range of selected site specific  
9 cancers with an elevated and more widespread increase in female burn patients. Overall, however,  
10 the increased cancer risk affected small proportions of the respective burn patient cohorts. More  
11 research is required to understand the underlying mechanism(s) that may link burn injury to an  
12 increased risk of some cancers and why this is elevated in females, which may in turn enable  
13 identification of possible sites for intervention.  
14  
15  
16  
17  
18  
19  
20  
21  
22  
23  
24  
25  
26  
27  
28  
29  
30  
31  
32  
33  
34  
35  
36  
37  
38  
39  
40  
41  
42  
43  
44  
45  
46  
47  
48  
49  
50  
51  
52  
53  
54  
55  
56  
57  
58  
59  
60

1  
2  
3  
4  
5  
6  
7  
8  
9  
10  
11  
12  
13  
14  
15  
16  
17  
18  
19  
20  
21  
22  
23  
24  
25  
26  
27  
28  
29  
30  
31  
32  
33  
34  
35  
36  
37  
38  
39  
40  
41  
42  
43  
44  
45  
46  
47  
48  
49  
50  
51  
52  
53  
54  
55  
56  
57  
58  
59  
60

**Acknowledgements**

The authors thank the staff of both the Health Information Linkage Branch for access to the Western Australian Data Linkage System and Scottish Record Linkage team for their assistance in obtaining the data and providing advice on aspects of coding. Furthermore, the authors would like to thank the WA Health Data Custodians for access to the core health datasets and both the Western Australian Department of Health and ISD Scotland for their assistance and advice. Project data costs were supported by an Australian National Health and Medical Research Council research grant and a Raine Medical Research Foundation Priming grant. J.M.D Senior Research Fellowship is supported by Woodside corporate sponsorship via the Fiona Wood Foundation.

For peer review only

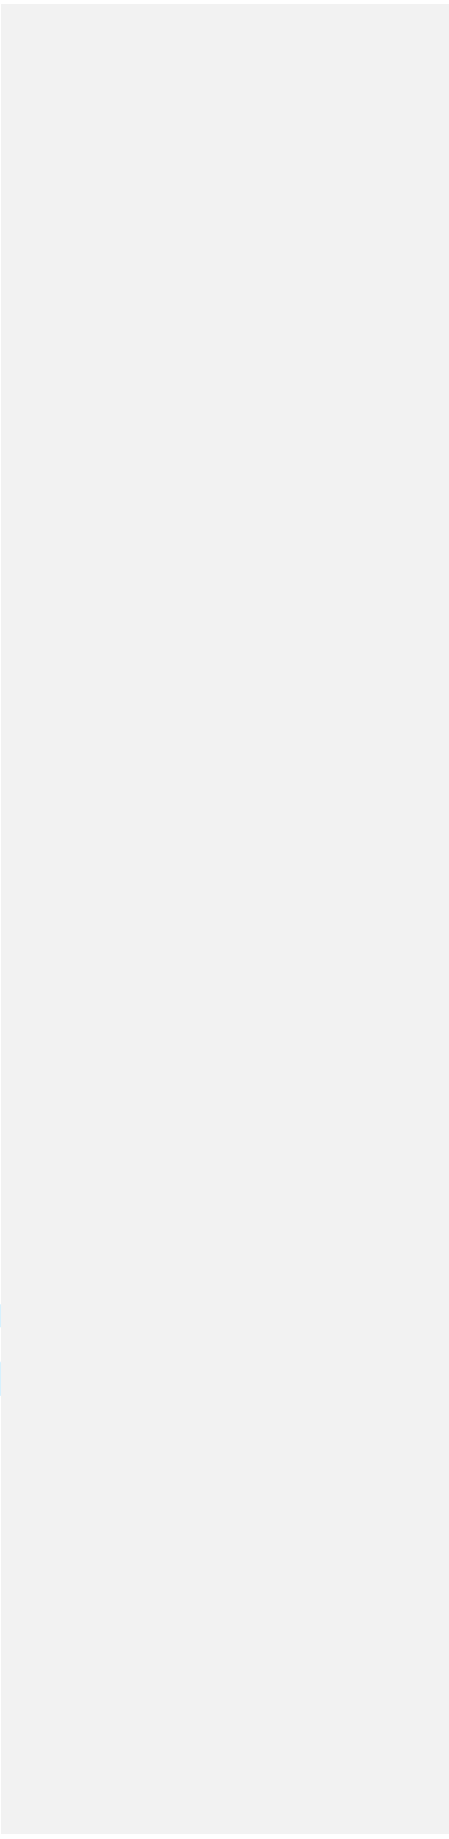

**Table 1** Characteristics of burn injury patients included in analyses with no record of cancer prior to separation date of index burn admission, 1983-2008, by country.

| Characteristics                       | Western Australia<br>N (%) | Scotland<br>N (%) |
|---------------------------------------|----------------------------|-------------------|
| <b>Total number burn admissions*</b>  | 22,705                     | 37,506            |
| <b>Gender: Male</b>                   | 15,481 (68.2)              | 23,896 (63.7)     |
| <b>Age at index admission (Years)</b> |                            |                   |
| <15                                   | 8,135 (35.8)               | 14,579 (38.9)     |
| 15-24                                 | 4,364 (19.2)               | 4,495 (12.0)      |
| 25-49                                 | 7,147 (31.5)               | 9,554 (25.5)      |
| 50-64                                 | 1,736 (7.7)                | 4,080 (10.9)      |
| 65+                                   | 1,323 (5.8)                | 4,798 (12.8)      |
| <b>Site of burn**</b>                 |                            |                   |
| Head and neck                         | 6,784 (15.4)               | 7,592 (16.1)      |
| Trunk                                 | 7,553 (17.2)               | 8,815 (21.0)      |
| Hand, wrist, upper limb               | 15,801 (35.9)              | 6,984 (14.8)      |
| Hip, lower limb                       | 11,798 (26.8)              | 9,531 (3.4)       |
| Eye                                   | 379 (0.9)                  | 1,087 (2.3)       |
| Respiratory tract                     | 212 (0.5)                  | 163 (0.3)         |
| Other internal organs                 | 124 (0.3)                  | 165 (0.3)         |
| Multiple regions                      | 656 (1.5)                  | 3,677 (7.8)       |
| Unspecified region                    | 694 (1.6)                  | 858 (1.8)         |
| <b>Burn site depth**</b>              |                            |                   |
| Erythema                              | 8,929 (20.9)               | 4,815 (11.5)      |
| Partial thickness                     | 18,449 (41.9)              | 6,302 (15.0)      |
| Full thickness                        | 7,095 (16.1)               | 4,924 (11.7)      |
| Unspecified                           | 9,528 (21.7)               | 25,869 (61.7)     |
| <b>Calendar period of admission</b>   |                            |                   |
| 1983-1988                             | 5,431 (23.9)               | 11,507 (30.7)     |
| 1989-1993                             | 4,200 (18.5)               | 7,876 (21.0)      |
| 1994-1998                             | 4,755 (20.9)               | 7,130 (19.0)      |
| 1999-2003                             | 4,265 (18.9)               | 5,980 (15.9)      |
| 2004-2008                             | 4,054 (17.9)               | 5,013 (13.4)      |
| <b>Any co-morbidity at index burn</b> |                            |                   |
| <b>Yes</b>                            | 2,798 (12.3)               | 7,679 (20.5)      |

\* No previous record of cancer

\*\* Patients may have multiple burn sites per anatomical region per depth

**Table 2** Standardised incidence ratios and 95% confidence intervals and observed and expected numbers for all-cause cancer in persons hospitalised for burn injury in Western Australia and Scotland, during the periods 1983-2008 and 1983-1988.

|                               | Western Australia <sup>††</sup> |                                    |                                      | Scotland                            |                                    |                                      |
|-------------------------------|---------------------------------|------------------------------------|--------------------------------------|-------------------------------------|------------------------------------|--------------------------------------|
|                               | Combined SIR 95%CI*<br>O:E**    | Male <sup>†</sup> SIR 95%CI<br>O:E | Female <sup>†</sup> SIR 95%CI<br>O:E | Combined SIR 95%CI<br>O:E           | Male <sup>†</sup> SIR 95%CI<br>O:E | Female <sup>†</sup> SIR 95%CI<br>O:E |
| <b>Total cohort 1983-2008</b> | 0.97 (0.9 to 1.0)<br>759: 785.5 | 0.9 (0.8 to 1.0)<br>515: 569.5     | 1.1 (1.0 to 1.3)<br>244: 216.0       | 1.09 (1.05 to 1.10)<br>2260: 2075.9 | 0.96 (0.90 to 1.0)<br>1249: 1303.2 | 1.3 (1.2 to 1.4)<br>1011: 772.6      |
| <b>Sub-cohort 1983-1988</b>   | 1.0 (0.9 to 1.1)<br>294:294.9   | 0.9 (0.8 to 1.0)<br>190:220.3      | 1.4 (1.1 to 1.7)<br>104: 74.6        | 0.9 (0.8 to 0.9)<br>838: 953.4      | 0.8 (0.7 to 0.9)<br>491: 614.3     | 1.0 (0.9 to 1.2)<br>347: 339.1       |

\*SIR (95%CI): Standardised Incidence Ratio (95% confidence interval) adjusted for age and gender

\*\* O: E: Observed: Expected

†SIR (95%CI): Standardised Incidence Ratio (95% confidence interval) adjusted for age

†† Western Australian comparison data Duke et al. Burns 2011; 38:340-47.

**Table 3** Standardised incidence ratios and 95% confidence intervals and observed and expected numbers for selected types of cancer in persons hospitalised for burns Western Australia and Scotland, 1983-2008.

| Cancer Site                                      | Western Australia               |                                |                               | Scotland                       |                                |                                |
|--------------------------------------------------|---------------------------------|--------------------------------|-------------------------------|--------------------------------|--------------------------------|--------------------------------|
|                                                  | Combined<br>SIR 95%CI*<br>O:E** | Male<br>SIR 95%CI†<br>O:E      | Female<br>SIR 95%CI†<br>O:E   | Combined<br>SIR 95%CI*<br>O:E  | Male<br>SIR 95%CI†<br>O:E      | Female<br>SIR 95%CI†<br>O:E    |
| Buccal cavity<br>C00 to C14                      | 1.4 (1.03 to 1.9)<br>45: 32.6   | 1.4 (1.0 to 1.9)<br>38:28.1    | 1.5 (0.7 to 3.2)<br>7: 4.6    | 2.6 (2.2 to 3.1)<br>117: 45.0  | 2.4 (1.9 to 2.9)<br>83: 35.1   | 3.4 (2.5 to 4.8)<br>34:9.9     |
| Oesophagus<br>C15                                | 1.4 (0.9 to 2.4)<br>15:10.50    | 1.5 (0.9 to 2.6)<br>13: 8.7    | 1.1 (0.3 to<br>4.5)<br>2: 1.8 | 1.6 (1.3 to 2.0)<br>82: 51.4   | 1.5 (1.1 to 1.9)<br>53:36.1    | 1.9 (1.3 to 2.7)<br>29:15.3    |
| Stomach<br>C16                                   | 0.6 (0.3 to 1.1)<br>10:17.0     | 0.5 (0.2 to 1.1)<br>7: 13.4    | 0.8 (0.3 to 2.6)<br>3: 3.6    | 1.2 (0.9 to 1.5)<br>73:63.2    | 1.1 (0.8 to 1.5)<br>1.2 5: 2.8 | 1.3 (0.9 to 1.9)<br>25:19.5    |
| Colorectal<br>C18 to C20                         | 0.7 (0.6 to 0.9)<br>69: 96.3    | 0.7 (0.5 to 0.9)<br>45: 69.1   | 0.9 (0.6 to 1.3)<br>24: 27.2  | 1.2 (1.1 to 1.4)<br>268:221.8  | 1.0 (0.9 to 1.2)<br>142:140.5  | 1.4 (1.3 to 1.8)<br>125: 81.3  |
| Liver<br>C22                                     | 2.6 (1.6 to 4.0)<br>19: 7.4     | 2.2 (1.3 to 3.7)<br>14: 6.3    | 4.7 (2.0 to 11.4)<br>5: 1.1   | 1.7 (1.2 to 2.5)<br>31:18.0    | 1.5 (1.1 to 2.5)<br>22: 13.3   | 1.9 (1.0 to 3.7)<br>9: 4.7     |
| Pancreas<br>C25                                  | 0.7 (0.4 to 1.3)<br>11: 15.3    | 0.9 (0.5 to 1.7)<br>9: 10.4    | 0.4 (0.1 to 1.6)<br>2: 5.0    | 1.1 (0.8 to 1.5)<br>44:39.6    | 1.5 (1.03 to 2.0)<br>34: 23.4  | 0.6 (0.3 to 1.2)<br>10: 16.2   |
| Larynx<br>C32                                    | 5.7 (0.9 to 3.3)<br>10: 5.7     | 1.5 (0.7 to 3.0)<br>8: 5.4     | 6.0 (1.5 to 24.1)<br>2: 0.3   | 1.9 (1.4 to 2.5)<br>39: 21.1   | 1.5 (1.1 to 2.2)<br>28: 18.5   | 4.2(2.3 to 7.7)<br>11:2.6      |
| Respiratory tract<br>C33 to C34                  | 1.4 (1.1 to 1.6)<br>101: 74.8   | 1.3 (1.1 to 1.7)<br>79:59.3    | 1.4 (0.9 to 2.2)<br>22:15.4   | 1.5 (1.4 to 1.7)<br>448:298.1  | 1.3 (1.2 to 1.5)<br>279:210.4  | 1.9 (1.7 to 2.2)<br>169:87.7   |
| Skin –melanoma<br>C44                            | 0.7 (0.6 to 0.9)<br>72: 102.0   | 0.7 (0.6 to 1.0)<br>57: 77.9   | 0.6 (0.4 to 1.0)<br>15: 24.1  | 0.8 (0.6 to 1.1)<br>38:48.5    | 0.7 (0.4 to 1.1)<br>19:28.4    | 1.0 (0.4 to 1.1)<br>19:20.0    |
| Breast<br>C50                                    | 1.0 (0.8 to 1.3)<br>65: 62.4    | 1.3 (0.2 to 9.2)<br>1: 0.8     | 1.0 (0.8 to 1.3)<br>64:61.7   | 1.7 (1.5 to 1.9)<br>271:161.4  | 0.7 (0.1 to 4.8)<br>1:1.5      | 1.6 (1.5 to 1.9)<br>270: 160.0 |
| Female genital<br>tract (combined)<br>C51 to C57 |                                 |                                | 1.4 (1.0 to 2.0)<br>31:26.7   |                                |                                | 1.7 (1.4 to 2.0)<br>114: 67.2  |
| Male genital<br>tract (combined)<br>C60 to C63   |                                 | 0.9 (0.8 to 1.1)<br>141: 150.7 |                               |                                | 1.1 (1.0 to 1.3)<br>210: 192.6 |                                |
| Prostate<br>C61                                  |                                 | 0.8 (0.6 to 0.9)<br>102: 135.9 |                               |                                | 1.1 (0.9 to 1.2)<br>177: 165.5 |                                |
| Kidney, Bladder,<br>UT C64 to C68                | 0.5 (0.3 to 0.7)<br>17: 37.9    | 0.4 (0.2 to 0.7)<br>12: 30.9   | 0.7 (0.3 to 1.7)<br>5: 7.0    | 1.2 (1.0 to 1.4)<br>135: 110.9 | 1.2 (1.0 to 1.4)<br>96: 82.8   | 1.4 (1.0 to 1.9)<br>39: 28.0   |
| Brain<br>C71                                     | 1.2 (0.7 to 1.9)<br>16: 13.9    | 1.0 (0.5 to 1.8)<br>10: 10.5   | 1.7 (0.8 to 3.9)<br>6: 3.5    | 1.5 (1.1 to 2.0)<br>39:27.0    | 1.4 (0.9 to 2.0)<br>26:19.2    | 1.7 (1.0 to 2.9)<br>13:7.8     |
| Lymphomas to<br>all                              | 1.0 (0.7 to 1.4)<br>36: 35.5    | 0.8 (0.5 to 1.2)<br>20: 26.0   | 1.7 (1.03 to 2.7)<br>16:9.6   | 1.1 (0.9 to 1.4)<br>75:68.0    | 1.1 (0.8 to 1.4)<br>48:45.0    | 1.2 (0.8 to 1.7)<br>27:23.0    |
| Myeloma/<br>plasma                               | 1.3 (0.7 to 2.3)<br>11: 8.6     | 1.3 (0.7 to 2.6)<br>8:6.1      | 1.2 (0.4 to 3.7)<br>3: 2.49   | 1.1 (0.7 to 1.6)<br>22:21.0    | 1.0 (0.6 to 1.7)<br>13:13.2    | 1.2 (0.6 to 2.2)<br>9: 7.8     |
| Leukaemia's to<br>all                            | 1.1 (0.8 to 1.7)<br>26: 22.9    | 1.1 (0.7 to 1.8)<br>19: 17.0   | 1.2 (0.6 to 2.5)<br>7: 6.0    | 1.3 (1.01 to 1.7)<br>63:48.6   | 1.0 (0.73 to 1.4)<br>34:33.1   | 1.8 (1.3 to 2.7)<br>29: 15.5   |

\*SIR (95%CI): Standardised Incidence Ratio adjusted for age and gender (95% confidence interval)

\*\* O: E: Observed: Expected

†SIR (95%CI): Standardised Incidence Ratio adjusted for age (95% confidence interval)

**Table 4** Standardised incidence ratios and 95% confidence intervals and observed and expected numbers for all-cause cancer incidence, for persons hospitalised for burns Western Australia and Scotland, by age group, 1983 to 1988.

| Age at first burn years | SIR (95%CI)<br>(observed: expected)  |                                      |                                      |
|-------------------------|--------------------------------------|--------------------------------------|--------------------------------------|
|                         | combined gender*                     | Male†                                | Female†                              |
| <b>&lt;15</b>           |                                      |                                      |                                      |
| <b>WA</b>               | 1.17 (0.82 to 1.68)<br>(30:25)       | 1.19 (0.77 to 1.84)<br>(20:16)       | 1.15 (0.62 to 2.14)<br>(10:8.6)      |
| <b>Scotland</b>         | 0.94 (0.69 to 1.28)<br>(41:43.69)    | 0.72 (0.47 to 1.12)<br>(20:27.77)    | 1.32 (0.86 to 2.02)<br>(21:15.92)    |
| <b>15 to 49</b>         |                                      |                                      |                                      |
| <b>WA</b>               | 0.87 (0.77 to 0.99)<br>(273: 313)    | 0.87 (0.75 to 1.00)<br>(197: 226)    | 0.86 (0.69 to 1.1)<br>(76: 87)       |
| <b>Scotland</b>         | 1.21 (1.12 to 1.31)<br>(617: 509.16) | 1.04 (0.94 to 1.16)<br>(345: 331.68) | 1.53 (1.36 to 1.73)<br>(272: 177.48) |
| <b>≥ 50</b>             |                                      |                                      |                                      |
| <b>WA</b>               | 1.02 (0.93 to 1.12)<br>(456: 446)    | 0.91 (0.82 to 1.02)<br>(298: 326)    | 1.32 (1.13 to 1.54)<br>(158: 120)    |
| <b>Scotland</b>         | 1.05 (1.00 to 1.11)<br>(1602: 1523)  | 0.94 (0.88 to 1.00)<br>(884: 943.75) | 1.23 (1.15 to 1.33)<br>(718:579.25)  |

\*SIR (95%CI): Standardised Incidence Ratio adjusted for age and gender (95% confidence interval)

†SIR (95%CI): Standardised Incidence Ratio adjusted for age (95% confidence interval)

## References

1. Anderson JR, Zorbas JS, Phillips JK, Harrison JL, Dawson LF, Bolt SE, et al. Systemic decreases in cutaneous innervation after burn injury. *J Invest Dermatol* 2010;130(7):1948-51.
2. Jeschke MG, Gauglitz GG, Kulp GA, Finnerty CC, Williams FN, Kraft R, et al. Long-term persistence of the pathophysiologic response to severe burn injury. *PLoS ONE [Electronic Resource]* 2011;6(7):e21245.
3. Rea S, Giles NL, Webb S, Adcroft KF, Evill LM, Strickland DH, et al. Bone marrow-derived cells in the healing burn wound--more than just inflammation. *Burns* 2009;35(3):356-64.
4. Deveci M, Sengezer M, Bozkurt M, Eski M, Inal A. Comparison of lymphocyte populations in cutaneous and electrical burn patients: a clinical study. *Burns* 2000;26(3):229-32.
5. Heideman M, Bengtsson A. The immunologic response to thermal injury. *World J Surg* 1992;16(1):53-6.
6. McGill SN, Cartotto RC. Herpes simplex virus infection in a paediatric burn patient: case report and review. *Burns* 2000;26(2):194-9.
7. O'Sullivan ST, O'Connor TP. Immunosuppression following thermal injury: the pathogenesis of immunodysfunction. *Br J Plast Surg* 1997;50(8):615-23.
8. Sjöberg T, Mzezewa S, Jonsson K, Salemark L. Immune response in burn patients in relation to HIV infection and sepsis. *Burns* 2004;30(7):670-4.
9. Jeschke MG, Barrow RE, Herndon DN. Extended hypermetabolic response of the liver in severely burned pediatric patients. *Arch Surg* 2004;139(6):641-7.
10. Harper A, Rea S, Wood F. Hepatocellular carcinoma in a young survivor of major burns. *Burns* 2008;34(4):572-4.
11. Duke J, Rea S, Semmens J, Edgar D, Wood F. Burn Injury and cancer risk: A state-wide longitudinal study. *Burns* 2011;38:340-47.
12. Lindelof B, Krynitz B, Granath F, Ekblom A. Burn injuries and skin cancer: a population-based cohort study. *Acta Derm Venereol* 2008;88(1):20-2.
13. Mellemkjaer L, Holmich LR, Gridley G, Rabkin C, Olsen JH. Risks for skin and other cancers up to 25 years after burn injuries. *Epidemiology* 2006;17(6):668-73.
14. Holman CDJ, Bass AJ, Rouse IL, Hobbs MST. Population-based linkage of health records in Western Australia: development of a health service research linked database. *Aust NZ J Public Health* 1999;23(5):453-59.
15. Kendrick S, Clarke J. The Scottish Record Linkage System. *Health Bulletin* 1993;51(2):72-9.
16. Duke J, Wood F, Semmens J, Spilsbury K, Edgar DW, Hendrie D, et al. A 26-year population-based study of burn injury hospital admissions in Western Australia. *J Burn Care Res* 2011;32(3):379-86.
17. Threlfall T, Thompson JR. Cancer incidence and mortality in Western Australia, 2008. Statistical Series Number 87. Perth: Department of Health, Western Australia, 2010.
18. ISD Scotland. ISD Scotland, better information, better decisions, better health, 2010.
19. Brewster DH, Stockton D, Harvey J, Mackay M. Reliability of cancer registration data in Scotland, 1997. *Eur J Cancer* 2002;38(3):414-7.
20. Brewster DH, Stockton DL. Ascertainment of breast cancer by the Scottish Cancer Registry: an assessment based on comparison with five independent breast cancer trials databases. *Breast* 2008;17(1):104-6.
21. Gordis L. *Epidemiology* Second ed. Philadelphia: W.B. Saunders Company, 2000.
22. Verkasalo PK, Pukkala E, Kaprio J, Heikkilä KV, Koskenvuo M. Magnetic fields of high voltage power lines and risk of cancer in Finnish adults: nationwide cohort study. *BMJ* 1996;313(7064):1047-51.
23. Bailar III J, Ederer F. Significance Factors for the Ratio of a Poisson Variable to Its Expectation. *Biometrics* 1964;20:639-43.
24. ISD Scotland. Assessment of SMR01 Data 2010-2011 Scotland Report May 2012. Edinburgh: NHS National Services Scotland, 2012.

25. Department of Health Western Australia. Clinical Information Audit Program - Hospital Activity Report. *Operational Directive OD 0201/09*. Perth Department of Health WA, 2009.
26. Adami J, Gabel H, Lindelof B, Ekstrom K, Rydh B, Glimelius B, et al. Cancer risk following organ transplantation: a nationwide cohort study in Sweden. *Br J Cancer* 2003;89(7):1221-7.
27. Birkeland SA, Storm HH, Lamm LU, Barlow L, Blohme I, Forsberg B, et al. Cancer risk after renal transplantation in the Nordic countries, 1964-1986. *Int J Cancer* 1995;60(2):183-9.
28. Horgan PG, Mannick JA, Dubravec DB, Rodrick ML. Effect of low dose recombinant interleukin 2 plus indomethacin on mortality after sepsis in a murine burn model. *Br J Surg* 1990;77(4):401-4.
29. Schmand JF, Ayala A, Chaudry IH. Effects of trauma, duration of hypotension, and resuscitation regimen on cellular immunity after hemorrhagic shock. *Crit Care Med* 1994;22(7):1076-83.
30. Liu D-m, Sun B-w, Sun Z-w, Jin Q, Sun Y, Chen X. Suppression of inflammatory cytokine production and oxidative stress by CO-releasing molecules-liberated CO in the small intestine of thermally-injured mice. *Zhongguo Yao Li Xue Bao/Acta Pharmacologica Sinica* 2008;29(7):838-46.
31. Shupp JW, Nasabzadeh TJ, Rosenthal DS, Jordan MH, Fidler P, Jeng JC. A review of the local pathophysiologic bases of burn wound progression. *J Burn Care Res* 2010;31(6):849-73.
32. Atiyeh BS, Gunn SWA, Dibo SA. Metabolic implications of severe burn injuries and their management: a systematic review of the literature. *World J Surg* 2008;32(8):1857-69.
33. Williams FN, Herndon DN, Jeschke MG. The hypermetabolic response to burn injury and interventions to modify this response. *Clin Plast Surg* 2009;36(4):583-96.
34. Ananthakrishnan P, Cohen DB, Xu DZ, Lu Q, Feketeova E, Deitch EA. Sex hormones modulate distant organ injury in both a trauma/hemorrhagic shock model and a burn model. *Surgery* 2005;137(1):56-65.
35. Dreschsler S, Weixelbaumer K, Raeven P, Jafarmadar M, Khadam A, van Griensven M, et al. Relationship between Age/Gender-Induced Survival Changes and the Magnitude of Inflammatory Activation and Organ Dysfunction in Post-Traumatic Sepsis. *PLoS ONE [Electronic Resource]* 2012;7(12):e5147.
36. Borue X, Lee S, Grove J, Herzog EL, Harris R, Diflo T, et al. Bone marrow-derived cells contribute to epithelial engraftment during wound healing. *Am J Pathol* 2004;165(5):1767-72.
37. Fan Q, Yee CL, Ohyama M, Tock C, Zhang G, Darling TN, et al. Bone marrow-derived keratinocytes are not detected in normal skin and only rarely detected in wounded skin in two different murine models. *Exp Hematol* 2006;34(5):672-9.
38. Harris RG, Herzog EL, Bruscia EM, Grove JE, Van Arnam JS, Krause DS. Lack of a fusion requirement for development of bone marrow-derived epithelia. *Science* 2004;305(5680):90-3.
39. Jeschke MG, Finnerty CC, Herndon DN, Song J, Boehning D, Tompkins RG, et al. Severe injury is associated with insulin resistance, endoplasmic reticulum stress response, and unfolded protein response. *Ann Surg* 2012;255(2):370-8.
40. Verfaillie T, Garg AD, Agostinis P. Targeting ER stress induced apoptosis and inflammation in cancer. *Cancer Lett* 2013;332(2):249-64.
41. Wang S, Kaufman RJ. The impact of the unfolded protein response on human disease. *Journal of Cell Biology* 2012;197(7):857-67.
42. George RL, McGwin G, Jr., Schwacha MG, Metzger J, Cross JM, Chaudry IH, et al. The association between sex and mortality among burn patients as modified by age. *J Burn Care Rehabil* 2005;26(5):416-21.
43. Kerby JD, McGwin G, Jr., George RL, Cross JA, Chaudry IH, Rue LW, 3rd, et al. Sex differences in mortality after burn injury: results of analysis of the National Burn Repository of the American Burn Association. *J Burn Care Res* 2006;27(4):452-6.
44. McGwin G, Jr., George RL, Cross JM, Reiff DA, Chaudry IH, Rue LW, 3rd. Gender differences in mortality following burn injury. *Shock* 2002;18(4):311-5.



- 1
  - 2
  - 3
  - 4
  - 5
  - 6
  - 7
  - 8
  - 9
  - 10
  - 11
  - 12
  - 13
  - 14
  - 15
  - 16
  - 17
  - 18
  - 19
  - 20
  - 21
  - 22
  - 23
  - 24
  - 25
  - 26
  - 27
  - 28
  - 29
  - 30
  - 31
  - 32
  - 33
  - 34
  - 35
  - 36
  - 37
  - 38
  - 39
  - 40
  - 41
  - 42
  - 43
  - 44
  - 45
  - 46
  - 47
  - 48
  - 49
  - 50
  - 51
  - 52
  - 53
  - 54
  - 55
  - 56
  - 57
  - 58
  - 59
  - 60
45. O'Keefe GE, Hunt JL, Purdue GF. An evaluation of risk factors for mortality after burn trauma and the identification of gender-dependent differences in outcomes. *J Am Coll Surg* 2001;192(2):153-60.
46. Frink M, Pape H-C, van Griensven M, Krettek C, Chaudry IH, Hildebrand F. Influence of sex and age on mods and cytokines after multiple injuries. *Shock* 2007;27(2):151-6.
47. Schroder J, Kahlke V, Book M, Stuber F. Gender differences in sepsis: genetically determined? *Shock* 2000;14(3):307-10; discussion 10-3.
48. Gregory MS, Duffner LA, Faunce DE, Kovacs EJ. Estrogen mediates the sex difference in post-burn immunosuppression. *J Endocrinol* 2000;164(2):129-38.
49. Gregory MS, Faunce DE, Duffner LA, Kovacs EJ. Gender difference in cell-mediated immunity after thermal injury is mediated, in part, by elevated levels of interleukin-6. *J Leukoc Biol* 2000;67(3):319-26.
50. Kahlke V, Angele MK, Ayala A, Schwacha MG, Cioffi WG, Bland KI, et al. Immune dysfunction following trauma-haemorrhage: influence of gender and age. *Cytokine* 2000;12(1):69-77.
51. Kahlke V, Angele MK, Schwacha MG, Ayala A, Cioffi WG, Bland KI, et al. Reversal of sexual dimorphism in splenic T lymphocyte responses after trauma-hemorrhage with aging. *Am J Physiol Cell Physiol* 2000;278(3):C509-16.
52. Plackett TP, Gamelli RL, Kovacs EJ. Gender-based differences in cytokine production after burn injury: a role of interleukin-6. *J Am Coll Surg* 2010;210(1):73-8.
53. Croce MA, Fabian TC, Malhotra AK, Bee TK, Miller PR. Does gender difference influence outcome? *J Trauma* 2002;53(5):889-94.
54. Horton JW, White DJ, Maass DL. Gender-related differences in myocardial inflammatory and contractile responses to major burn trauma. *Am J Physiol Heart Circ Physiol* 2004;286(1):H202-13.
55. Mace JE, Park MS, Mora AG, Chung KK, Martini W, White CE, et al. Differential expression of the immunoinflammatory response in trauma patients: burn vs. non-burn. *Burns* 2012;38(4):599-606.
56. Verthelyi D. Sex hormones as immunomodulators in health and disease. *Int Immunopharmacol* 2001;1(6):983-93.
57. Scotland RS, Stables MJ, Madalli S, Watson P, Gilroy DW. Sex differences in resident immune cell phenotype underlie more efficient acute inflammatory responses in female mice. *Blood* 2011;118(22):5918-27.
58. Sperry JL, Nathens AB, Frankel HL, Vanek SL, Moore EE, Maier RV, et al. Characterization of the gender dimorphism after injury and hemorrhagic shock: are hormonal differences responsible? *Crit Care Med* 2008;36(6):1838-45.
59. Ozelik T. X chromosome inactivation and female predisposition to autoimmunity. *Clin Rev Allergy Immunol* 2008;34(3):348-51.
60. Nicol T, Vernon-Roberts B, Quantock DC. Effect of orchidectomy and ovariectomy on survival against lethal infections in mice. *Nature* 1966;211(5053):1091-2.
61. Paavonen T. Hormonal regulation of immune responses. *Ann Med* 1994;26(4):255-8.
62. Rettew JA, Huet YM, Marriott I. Estrogens augment cell surface TLR4 expression on murine macrophages and regulate sepsis susceptibility in vivo. *Endocrinology* 2009;150(8):3877-84.
63. Libert C, Dejager L, Pinheiro I. The X chromosome in immune functions: when a chromosome makes the difference. *Nat Rev Immunol* 2010;10(8):594-604.
64. Pinheiro I, Dejager L, Libert C. X-chromosome-located microRNAs in immunity: might they explain male/female differences? The X chromosome-genomic context may affect X-located miRNAs and downstream signaling, thereby contributing to the enhanced immune response of females. *Bioessays* 2011;33(11):791-802.

1  
2  
3  
4  
5  
6  
7  
8  
9  
10  
11  
12  
13  
14  
15  
16  
17  
18  
19  
20  
21  
22  
23  
24  
25  
26  
27  
28  
29  
30  
31  
32  
33  
34  
35  
36  
37  
38  
39  
40  
41  
42  
43  
44  
45  
46  
47  
48  
49  
50  
51  
52  
53  
54  
55  
56  
57  
58  
59  
60

|

For peer review only

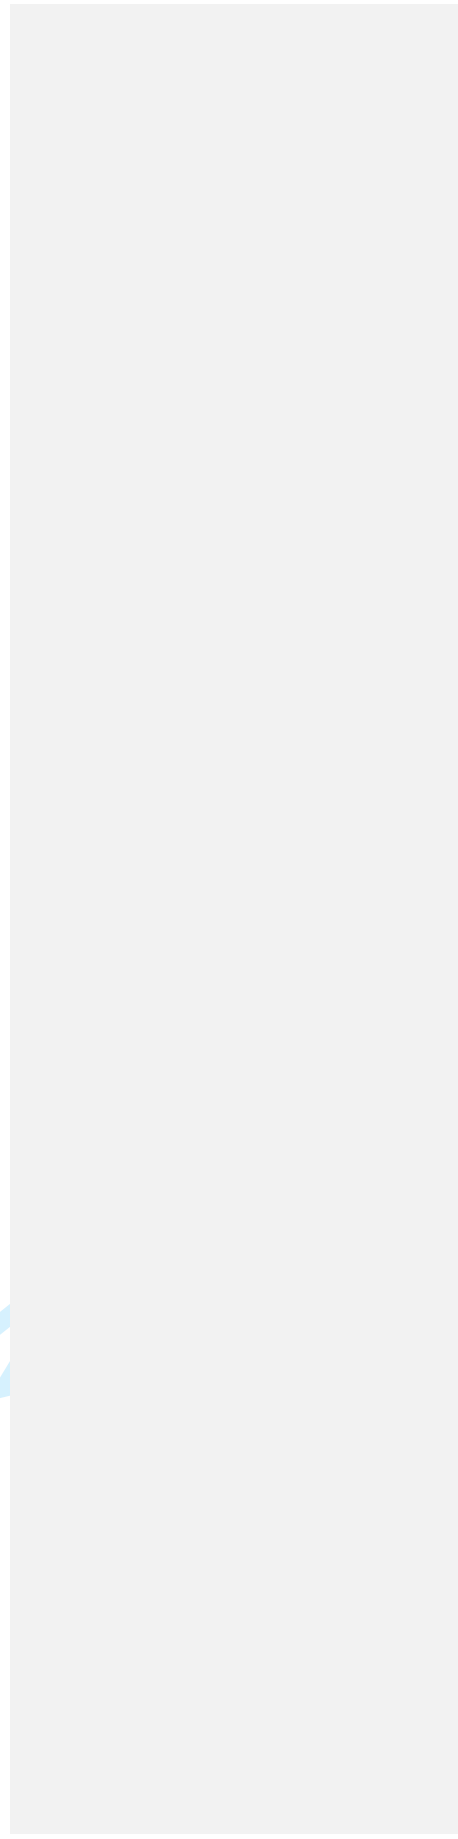

1. Anderson JR, Zorbas JS, Phillips JK, Harrison JL, Dawson LF, Bolt SE, et al. Systemic decreases in cutaneous innervation after burn injury. *Journal of Investigative Dermatology* 2010;130(7):1948-51.
2. Jeschke MG, Gauglitz GG, Kulp GA, Finnerty CC, Williams FN, Kraft R, et al. Long-term persistence of the pathophysiologic response to severe burn injury. *PLoS ONE [Electronic Resource]* 2011;6(7):e21245.
3. Rea S, Giles NL, Webb S, Adcroft KF, Evill LM, Strickland DH, et al. Bone marrow derived cells in the healing burn wound more than just inflammation. *Burns* 2009;35(3):356-64.
4. Deveci M, Sengezer M, Bozkurt M, Eski M, Inal A. Comparison of lymphocyte populations in cutaneous and electrical burn patients: a clinical study. *Burns* 2000;26(3):229-32.
5. Heideman M, Bengtsson A. The immunologic response to thermal injury. *World Journal of Surgery* 1992;16(1):53-6.
6. McGill SN, Cartotto RC. Herpes simplex virus infection in a paediatric burn patient: case report and review. *Burns* 2000;26(2):194-9.
7. O'Sullivan ST, O'Connor TP. Immunosuppression following thermal injury: the pathogenesis of immunodysfunction. *British Journal of Plastic Surgery* 1997;50(8):615-23.
8. Sjoberg T, Mzezewa S, Jonsson K, Salemark L. Immune response in burn patients in relation to HIV infection and sepsis. *Burns* 2004;30(7):670-4.
9. Jeschke MG, Barrow RE, Herndon DN. Extended hypermetabolic response of the liver in severely burned pediatric patients. *Archives of Surgery* 2004;139(6):641-7.
10. Harper A, Rea S, Wood F. Hepatocellular carcinoma in a young survivor of major burns. *Burns* 2008;34(4):572-4.
11. Duke J, Rea S, Semmens J, Edgar D, Wood F. Burn Injury and cancer risk: A state wide longitudinal study. *Burns* 2011;38:340-47.
12. Holman CDJ, Bass AJ, Rouse IL, Hobbs MST. Population-based linkage of health records in Western Australia: development of a health service research linked database. *Australian and New Zealand Journal of Public Health* 1999;23(5):453-59.
13. Kendrick S, Clarke J. The Scottish Record Linkage System. *Health Bulletin* 1993;51(2):72-9.
14. Duke J, Wood F, Semmens J, Spilsbury K, Edgar DW, Hendrie D, et al. A 26 year population based study of burn injury hospital admissions in Western Australia. *Journal of Burn Care & Research* 2011;32(3):379-86.
15. Threlfall T, Thompson JR. Cancer incidence and mortality in Western Australia, 2008. Statistical Series Number 87. Perth: Department of Health, Western Australia 2010.
16. ISD Scotland. ISD Scotland, better information, better decisions, better health, 2010.
17. Brewster DH, Stockton D, Harvey J, Mackay M. Reliability of cancer registration data in Scotland, 1997. *European Journal of Cancer* 2002;38(3):414-7.
18. Brewster DH, Stockton DL. Ascertainment of breast cancer by the Scottish Cancer Registry: an assessment based on comparison with five independent breast cancer trials databases. *Breast* 2008;17(1):104-6.
19. Bailar III J, Ederer F. Significance Factors for the Ratio of a Poisson Variable to Its Expectation. *Biometrics* 1964;20:639-43.
20. ISD Scotland. Assessment of SMR01 Data 2010-2011 Scotland Report May 2012. Edinburgh: NHS National Services Scotland, 2012.
21. Department of Health Western Australia. Clinical Information Audit Program—Hospital Activity Report. *Operational Directive OD 0201/09*. Perth Department of Health WA, 2009.
22. Mellemkjaer L, Holmich LR, Gridley G, Rabkin C, Olsen JH. Risks for skin and other cancers up to 25 years after burn injuries. *Epidemiology* 2006;17(6):668-73.
23. Lindelof B, Krynitz B, Granath F, Ekbohm A. Burn injuries and skin cancer: a population-based cohort study. *Acta Dermato-Venereologica* 2008;88(1):20-2.

Formatted: Space After: 0 pt

24. Horgan PG, Mannick JA, Dubravec DB, Rodrick ML. Effect of low dose recombinant interleukin 2 plus indomethacin on mortality after sepsis in a murine burn model. *British Journal of Surgery* 1990;77(4):401-4.
25. Schmand JF, Ayala A, Chaudry IH. Effects of trauma, duration of hypotension, and resuscitation regimen on cellular immunity after hemorrhagic shock. *Critical Care Medicine* 1994;22(7):1076-83.
26. Liu D-m, Sun B-w, Sun Z-w, Jin Q, Sun Y, Chen X. Suppression of inflammatory cytokine production and oxidative stress by CO-releasing molecules liberated CO in the small intestine of thermally injured mice. *Zhongguo Yao Li Xue Bao/Acta Pharmacologica Sinica* 2008;29(7):838-46.
27. Shupp JW, Nasabzadeh TJ, Rosenthal DS, Jordan MH, Fidler P, Jeng JC. A review of the local pathophysiologic bases of burn wound progression. *Journal of Burn Care & Research* 2010;31(6):849-73.
28. Atiyeh BS, Gunn SWA, Dibo SA. Metabolic implications of severe burn injuries and their management: a systematic review of the literature. *World Journal of Surgery* 2008;32(8):1857-69.
29. Williams FN, Herndon DN, Jeschke MG. The hypermetabolic response to burn injury and interventions to modify this response. *Clinics in Plastic Surgery* 2009;36(4):583-96.
30. Ananthakrishnan P, Cohen DB, Xu DZ, Lu Q, Feketeova E, Deitch EA. Sex hormones modulate distant organ injury in both a trauma/hemorrhagic shock model and a burn model. *Surgery* 2005;137(1):56-65.
31. Dreschsler S, Weixelbaumer K, Raeven P, Jafarmadar M, Khadam A, van Griensven M, et al. Relationship between Age/Gender Induced Survival and the Magnitude of Inflammatory Activation and Organ Dysfunction in Post-Traumatic Sepsis. *PLoS ONE [Electronic Resource]* 2012;7(12):e5147.
32. Borue X, Lee S, Grove J, Herzog EL, Harris R, Diflo T, et al. Bone marrow derived cells contribute to epithelial engraftment during wound healing. *American Journal of Pathology* 2004;165(5):1767-72.
33. Fan Q, Yee CL, Ohyama M, Tock C, Zhang G, Darling TN, et al. Bone marrow derived keratinocytes are not detected in normal skin and only rarely detected in wounded skin in two different murine models. *Experimental Hematology* 2006;34(5):672-9.
34. Harris RG, Herzog EL, Bruscia EM, Grove JE, Van Arnam JS, Krause DS. Lack of a fusion requirement for development of bone marrow derived epithelia. *Science* 2004;305(5680):90-3.
35. Jeschke MG, Finnerty CC, Herndon DN, Song J, Boehning D, Tompkins RG, et al. Severe injury is associated with insulin resistance, endoplasmic reticulum stress response, and unfolded protein response. *Annals of Surgery* 2012;255(2):370-8.
36. Verfaillie T, Garg AD, Agostinis P. Targeting ER stress induced apoptosis and inflammation in cancer. *Cancer Letters* 2013;332(2):249-64.
37. Wang S, Kaufman RJ. The impact of the unfolded protein response on human disease. *Journal of Cell Biology* 2012;197(7):857-67.
38. George RL, McGwin G, Jr., Schwacha MG, Metzger J, Cross JM, Chaudry IH, et al. The association between sex and mortality among burn patients as modified by age. *Journal of Burn Care & Rehabilitation* 2005;26(5):416-21.
39. Kerby JD, McGwin G, Jr., George RL, Cross JA, Chaudry IH, Rue LW, 3rd, et al. Sex differences in mortality after burn injury: results of analysis of the National Burn Repository of the American Burn Association. *Journal of Burn Care & Research* 2006;27(4):452-6.
40. McGwin G, Jr., George RL, Cross JM, Reiff DA, Chaudry IH, Rue LW, 3rd. Gender differences in mortality following burn injury. *Shock* 2002;18(4):311-5.

- 1  
2  
3  
4  
5  
6  
7  
8  
9  
10  
11  
12  
13  
14  
15  
16  
17  
18  
19  
20  
21  
22  
23  
24  
25  
26  
27  
28  
29  
30  
31  
32  
33  
34  
35  
36  
37  
38  
39  
40  
41  
42  
43  
44  
45  
46  
47  
48  
49  
50  
51  
52  
53  
54  
55  
56  
57  
58  
59  
60
41. O'Keefe GE, Hunt JL, Purdue GF. An evaluation of risk factors for mortality after burn trauma and the identification of gender-dependent differences in outcomes. *Journal of the American College of Surgeons* 2001;192(2):153-60.
  42. Frink M, Pape H-C, van Griensven M, Krettek C, Chaudry IH, Hildebrand F. Influence of sex and age on mods and cytokines after multiple injuries. *Shock* 2007;27(2):151-6.
  43. Schroder J, Kahlke V, Book M, Stuber F. Gender differences in sepsis: genetically determined? *Shock* 2000;14(3):307-10; discussion 10-3.
  44. Gregory MS, Duffner LA, Faunce DE, Kovacs EJ. Estrogen mediates the sex difference in post burn immunosuppression. *Journal of Endocrinology* 2000;164(2):129-38.
  45. Gregory MS, Faunce DE, Duffner LA, Kovacs EJ. Gender difference in cell-mediated immunity after thermal injury is mediated, in part, by elevated levels of interleukin-6. *Journal of Leukocyte Biology* 2000;67(3):319-26.
  46. Kahlke V, Angele MK, Ayala A, Schwacha MG, Cioffi WG, Bland KI, et al. Immune dysfunction following trauma-haemorrhage: influence of gender and age. *Cytokine* 2000;12(1):69-77.
  47. Kahlke V, Angele MK, Schwacha MG, Ayala A, Cioffi WG, Bland KI, et al. Reversal of sexual dimorphism in splenic T lymphocyte responses after trauma-hemorrhage with aging. *American Journal of Physiology - Cell Physiology* 2000;278(3):C509-16.
  48. Plackett TP, Gamelli RL, Kovacs EJ. Gender-based differences in cytokine production after burn injury: a role of interleukin-6. *Journal of the American College of Surgeons* 2010;210(1):73-8.
  49. Croce MA, Fabian TC, Malhotra AK, Bee TK, Miller PR. Does gender difference influence outcome? *Journal of Trauma Injury Infection & Critical Care* 2002;53(5):889-94.
  50. Horton JW, White DJ, Maass DL. Gender-related differences in myocardial inflammatory and contractile responses to major burn trauma. *American Journal of Physiology - Heart & Circulatory Physiology* 2004;286(1):H202-13.
  51. Mace JE, Park MS, Mora AG, Chung KK, Martini W, White CE, et al. Differential expression of the immunoinflammatory response in trauma patients: burn vs. non-burn. *Burns* 2012;38(4):599-606.
  52. Verthelyi D. Sex hormones as immunomodulators in health and disease. *International Immunopharmacology* 2001;1(6):983-93.
  53. Scotland RS, Stables MJ, Madalli S, Watson P, Gilroy DW. Sex differences in resident immune cell phenotype underlie more efficient acute inflammatory responses in female mice. *Blood* 2011;118(22):5918-27.
  54. Sperry JL, Nathens AB, Frankel HL, Vanek SL, Moore EE, Maier RV, et al. Characterization of the gender dimorphism after injury and hemorrhagic shock: are hormonal differences responsible? *Critical Care Medicine* 2008;36(6):1838-45.
  55. Ozelik T. X chromosome inactivation and female predisposition to autoimmunity. *Clinical Reviews in Allergy & Immunology* 2008;34(3):348-51.
  56. Nicol T, Vernon-Roberts B, Quantock DC. Effect of orchidectomy and ovariectomy on survival against lethal infections in mice. *Nature* 1966;211(5053):1091-2.
  57. Paavonen T. Hormonal regulation of immune responses. *Annals of Medicine* 1994;26(4):255-8.
  58. Rettew JA, Huot YM, Marriott I. Estrogens augment cell surface TLR4 expression on murine macrophages and regulate sepsis susceptibility in vivo. *Endocrinology* 2009;150(8):3877-84.
  59. Libert C, Dejager L, Pinheiro I. The X chromosome in immune functions: when a chromosome makes the difference. *Nature Reviews Immunology* 2010;10(8):594-604.
  60. Pinheiro I, Dejager L, Libert C. X chromosome located microRNAs in immunity: might they explain male/female differences? The X chromosome genomic context may affect X located miRNAs and downstream signaling, thereby contributing to the enhanced immune response of females. *Bioessays* 2011;33(11):791-802.

Formatted: Space After: 0 pt

Formatted: Indent: Left: 0", Hanging: 0.5",  
Space After: 0 pt

Formatted: Space After: 0 pt

STROBE Statement—checklist of items that should be included in reports of observational studies

*Page numbers in this checklist – relate to page numbers of the final pdf version of uploaded manuscript file*

|                           | Item No | Recommendation                                                                                                                                                                                                                                                                                                                                                                                                                                                                                                                                                                                                                                                                                                                                                                                                                       |
|---------------------------|---------|--------------------------------------------------------------------------------------------------------------------------------------------------------------------------------------------------------------------------------------------------------------------------------------------------------------------------------------------------------------------------------------------------------------------------------------------------------------------------------------------------------------------------------------------------------------------------------------------------------------------------------------------------------------------------------------------------------------------------------------------------------------------------------------------------------------------------------------|
| <b>Title and abstract</b> | 1       | <p>(a) Indicate the study's design with a commonly used term in the title or the abstract<br/><i>Population-based retrospective cohort record linkage study – in abstract</i><br/><i>Title: Burn injury, gender and cancer risk: population-based cohort study using data from Scotland and Western Australia. (Pages 1, 5)</i></p> <p>(b) Provide in the abstract an informative and balanced summary of what was done and what was found<br/><i>Abstract - Page 5</i></p>                                                                                                                                                                                                                                                                                                                                                          |
| <b>Introduction</b>       |         |                                                                                                                                                                                                                                                                                                                                                                                                                                                                                                                                                                                                                                                                                                                                                                                                                                      |
| Background/rationale      | 2       | <p>Explain the scientific background and rationale for the investigation being reported<br/><i>While burns predominantly affect the skin, burns are associated with significant systemic effects, depressed immune functioning and prolonged periods of systemic catabolism and hypermetabolism, that may increase a person's risk of cancer. (Page 6)</i></p>                                                                                                                                                                                                                                                                                                                                                                                                                                                                       |
| Objectives                | 3       | <p>State specific objectives, including any prespecified hypotheses<br/><i>Done: Firstly, confirm the increased risk of 'all-cause' cancer observed in the preliminary Western Australian study of female burn survivors using the Scottish data; and, secondly, examine site-specific cancer risk amongst survivors of burn injury (Page 6)</i></p>                                                                                                                                                                                                                                                                                                                                                                                                                                                                                 |
| <b>Methods</b>            |         |                                                                                                                                                                                                                                                                                                                                                                                                                                                                                                                                                                                                                                                                                                                                                                                                                                      |
| Study design              | 4       | <p>Present key elements of study design early in the paper<br/><i>Clearly presented in Introduction and Methods sections (Pages 5- 8)</i></p>                                                                                                                                                                                                                                                                                                                                                                                                                                                                                                                                                                                                                                                                                        |
| Setting                   | 5       | <p>Describe the setting, locations, and relevant dates, including periods of recruitment, exposure, follow-up, and data collection<br/><i>Clearly presented in Methods section (Pages 6 - 8)</i></p>                                                                                                                                                                                                                                                                                                                                                                                                                                                                                                                                                                                                                                 |
| Participants              | 6       | <p>(a) <i>Cohort study</i>—Give the eligibility criteria, and the sources and methods of selection of participants. Describe methods of follow-up<br/><i>Population-based study of linked health administrative datasets: whole of population data are used. (Pages 6-8)</i><br/><i>Case-control study</i>—Give the eligibility criteria, and the sources and methods of case ascertainment and control selection. Give the rationale for the choice of cases and controls<br/><i>Cross-sectional study</i>—Give the eligibility criteria, and the sources and methods of selection of participants</p> <p>(b) <i>Cohort study</i>—For matched studies, give matching criteria and number of exposed and unexposed<br/><i>Case-control study</i>—For matched studies, give matching criteria and the number of controls per case</p> |
| Variables                 | 7       | <p>Clearly define all outcomes, exposures, predictors, potential confounders, and effect modifiers. Give diagnostic criteria, if applicable<br/><i>Burn exposure (Page 7) and cancer outcomes (Page 8) clearly defined.</i></p>                                                                                                                                                                                                                                                                                                                                                                                                                                                                                                                                                                                                      |

|                              |    |                                                                                                                                                                                                                                                                                                                                                                                                                                                                                                                                                                                                                                                                                                                                                                                                                                                                                                                                                                                                                                                                                                               |
|------------------------------|----|---------------------------------------------------------------------------------------------------------------------------------------------------------------------------------------------------------------------------------------------------------------------------------------------------------------------------------------------------------------------------------------------------------------------------------------------------------------------------------------------------------------------------------------------------------------------------------------------------------------------------------------------------------------------------------------------------------------------------------------------------------------------------------------------------------------------------------------------------------------------------------------------------------------------------------------------------------------------------------------------------------------------------------------------------------------------------------------------------------------|
| Data sources/<br>measurement | 8* | For each variable of interest, give sources of data and details of methods of assessment (measurement). Describe comparability of assessment methods if there is more than one group<br><i>Data sources clearly defined in Methods: Information Service Division (ISD) Scotland Western Australia Data Linkage System (Page 7) and reference population-based age and gender cancer incidence rates (Page 7-8)</i>                                                                                                                                                                                                                                                                                                                                                                                                                                                                                                                                                                                                                                                                                            |
| Bias                         | 9  | Describe any efforts to address potential sources of bias<br><i>Population-level linked administrative data minimises issues of selection and reporting bias, and loss to follow-up.</i>                                                                                                                                                                                                                                                                                                                                                                                                                                                                                                                                                                                                                                                                                                                                                                                                                                                                                                                      |
| Study size                   | 10 | Explain how the study size was arrived at<br><i>Whole of population study undertaken (Scotland and Western Australia) stated in Methods (Page 6-8).</i>                                                                                                                                                                                                                                                                                                                                                                                                                                                                                                                                                                                                                                                                                                                                                                                                                                                                                                                                                       |
| Quantitative variables       | 11 | Explain how quantitative variables were handled in the analyses. If applicable, describe which groupings were chosen and why<br><i>Groupings described / defined in Methods (Page 8)</i>                                                                                                                                                                                                                                                                                                                                                                                                                                                                                                                                                                                                                                                                                                                                                                                                                                                                                                                      |
| Statistical methods          | 12 | (a) Describe all statistical methods, including those used to control for confounding<br><i>All analyses clearly presented in Methods for each cohort of burn patients hospitalised in both Scotland and Western Australia: 1) from 1983 to 2008; 2) subgroup 1983-1988; and 3) by grouped age at admission (&lt;15; ≥15 and &lt;50; ≥ 50 years) (Page 8)</i><br><i>Whole of population examination of observed versus expected cancer cases using Standardised Incidence Ratios, adjusting for 5-year age group and gender, and calendar period from 1983-2008.</i><br>(b) Describe any methods used to examine subgroups and interactions<br>(c) Explain how missing data were addressed<br>(d) Cohort study—If applicable, explain how loss to follow-up was addressed<br><i>Whole of population based study using linked data (Page 6-8)</i><br><i>Case-control study—If applicable, explain how matching of cases and controls was addressed</i><br><i>Cross-sectional study—If applicable, describe analytical methods taking account of sampling strategy</i><br>(e) Describe any sensitivity analyses |

## Results

|                  |     |                                                                                                                                                                                                                                                                                                                                                                                                                                                                |
|------------------|-----|----------------------------------------------------------------------------------------------------------------------------------------------------------------------------------------------------------------------------------------------------------------------------------------------------------------------------------------------------------------------------------------------------------------------------------------------------------------|
| Participants     | 13* | a) Report numbers of individuals at each stage of study—eg numbers potentially eligible, examined for eligibility, confirmed eligible, included in the study, completing follow-up, and analysed<br><i>Numbers of patient records included in study clearly stated in Results (Pages 8-9)</i><br>(b) Give reasons for non-participation at each stage<br>(c) Consider use of a flow diagram                                                                    |
| Descriptive data | 14* | (a) Give characteristics of study participants (eg demographic, clinical, social) and information on exposures and potential confounders<br><i>Data presented in Table 1 (Page 15)</i><br>(b) Indicate number of participants with missing data for each variable of interest<br><i>N/A</i><br>(c) Cohort study—Summarise follow-up time (eg, average and total amount)<br><i>Average follow up time presented for each patient cohort in Results (Page 9)</i> |



|    |                          |     |                                                                                                         |
|----|--------------------------|-----|---------------------------------------------------------------------------------------------------------|
| 1  |                          |     |                                                                                                         |
| 2  | Outcome data             | 15* | <i>Cohort study</i> —Report numbers of outcome events or summary measures over time                     |
| 3  |                          |     | <i>Presented in Results (Page 9) and Table 2 (Page 16), Table 3 (Page 17) and Table 4 (Page</i>         |
| 4  |                          |     | <i>18)</i>                                                                                              |
| 5  |                          |     | <i>Case-control study</i> —Report numbers in each exposure category, or summary measures of             |
| 6  |                          |     | exposure                                                                                                |
| 7  |                          |     | <i>Cross-sectional study</i> —Report numbers of outcome events or summary measures                      |
| 8  |                          |     |                                                                                                         |
| 9  | Main results             | 16  | (a) Give unadjusted estimates and, if applicable, confounder-adjusted estimates and their               |
| 10 |                          |     | precision (eg, 95% confidence interval). Make clear which confounders were adjusted for and             |
| 11 |                          |     | why they were included                                                                                  |
| 12 |                          |     | <i>Standardised Incidence Ratio (SIR) and 95% Confidence Intervals clearly presented in text</i>        |
| 13 |                          |     | <i>and Tables with appropriate labelling of variables standardised for (e.g. 5-year age groups,</i>     |
| 14 |                          |     | <i>gender). Presented in Results (Page 9) and Table 2 (Page 16), Table 3 (Page 17) and Table</i>        |
| 15 |                          |     | <i>4 (Page 18)</i>                                                                                      |
| 16 |                          |     | (b) Report category boundaries when continuous variables were categorized                               |
| 17 |                          |     | Age boundaries clearly reported                                                                         |
| 18 |                          |     | (c) If relevant, consider translating estimates of relative risk into absolute risk for a               |
| 19 |                          |     | meaningful time period                                                                                  |
| 20 |                          |     |                                                                                                         |
| 21 | Other analyses           | 17  | Report other analyses done—eg analyses of subgroups and interactions, and sensitivity                   |
| 22 |                          |     | analyses                                                                                                |
| 23 |                          |     | <i>All results of sub-group analyses presented. (Tables 2-4 – Pages 16-18)</i>                          |
| 24 |                          |     |                                                                                                         |
| 25 |                          |     |                                                                                                         |
| 26 |                          |     |                                                                                                         |
| 27 | <b>Discussion</b>        |     |                                                                                                         |
| 28 | Key results              | 18  | Summarise key results with reference to study objectives                                                |
| 29 |                          |     | <i>Page 12</i>                                                                                          |
| 30 |                          |     |                                                                                                         |
| 31 | Limitations              | 19  | Discuss limitations of the study, taking into account sources of potential bias or imprecision.         |
| 32 |                          |     | Discuss both direction and magnitude of any potential bias                                              |
| 33 |                          |     | <i>Strengths and limitations of the study have been presented in the Discussion 4.2</i>                 |
| 34 |                          |     | <i>Methodological Issues (Pages 10-11).</i>                                                             |
| 35 |                          |     | <i>The burn patient cohorts under study are part of the respective reference populations, and as</i>    |
| 36 |                          |     | <i>such, this may have a diluting effect in the standardised incidence ratios. The results</i>          |
| 37 |                          |     | <i>presented are for the total burn patient cohorts including both severe and non-severe burns;</i>     |
| 38 |                          |     | <i>the results are therefore, conservative.</i>                                                         |
| 39 |                          |     |                                                                                                         |
| 40 | Interpretation           | 20  | Give a cautious overall interpretation of results considering objectives, limitations,                  |
| 41 |                          |     | multiplicity of analyses, results from similar studies, and other relevant evidence.                    |
| 42 |                          |     | <i>The results are conservative and results have been interpreted in light of current literature on</i> |
| 43 |                          |     | <i>the impacts of burn injury on the immune system and other systemic effects. (Pages 10 – 13)</i>      |
| 44 |                          |     |                                                                                                         |
| 45 | Generalisability         | 21  | Discuss the generalisability (external validity) of the study results                                   |
| 46 |                          |     | <i>Expected that the sex dimorphic effects on cancer post-burn are generalisable.</i>                   |
| 47 |                          |     | <i>The evidence of increased cancer incidence after burn injury, with a greater effect in females,</i>  |
| 48 |                          |     | <i>suggests the systemic immune response to burn injury may be a mediator of cancer</i>                 |
| 49 |                          |     | <i>susceptibility. (Page 13)</i>                                                                        |
| 50 |                          |     |                                                                                                         |
| 51 | <b>Other information</b> |     |                                                                                                         |
| 52 | Funding                  | 22  | Give the source of funding and the role of the funders for the present study and, if applicable,        |
| 53 |                          |     | for the original study on which the present article is based                                            |
| 54 |                          |     | <i>Funding sources disclosed (Pages 3, 14)</i>                                                          |
| 55 |                          |     |                                                                                                         |

\*Give information separately for cases and controls in case-control studies and, if applicable, for exposed and unexposed groups in cohort and cross-sectional studies.



1  
2 **Note:** An Explanation and Elaboration article discusses each checklist item and gives methodological background and  
3 published examples of transparent reporting. The STROBE checklist is best used in conjunction with this article (freely  
4 available on the Web sites of PLoS Medicine at <http://www.plosmedicine.org/>, Annals of Internal Medicine at  
5 <http://www.annals.org/>, and Epidemiology at <http://www.epidem.com/>). Information on the STROBE Initiative is  
6 available at [www.strobe-statement.org](http://www.strobe-statement.org).  
7  
8  
9  
10  
11  
12  
13  
14  
15  
16  
17  
18  
19  
20  
21  
22  
23  
24  
25  
26  
27  
28  
29  
30  
31  
32  
33  
34  
35  
36  
37  
38  
39  
40  
41  
42  
43  
44  
45  
46  
47  
48  
49  
50  
51  
52  
53  
54  
55  
56  
57  
58  
59  
60

For peer review only



**Burn injury, gender and cancer risk: population-based cohort study using data from Scotland and Western Australia**

|                                 |                                                                                                                                                                                                                                                                                                                                                                                                                                                                                                                                                                                                                                                                                                                                                         |
|---------------------------------|---------------------------------------------------------------------------------------------------------------------------------------------------------------------------------------------------------------------------------------------------------------------------------------------------------------------------------------------------------------------------------------------------------------------------------------------------------------------------------------------------------------------------------------------------------------------------------------------------------------------------------------------------------------------------------------------------------------------------------------------------------|
| Journal:                        | <i>BMJ Open</i>                                                                                                                                                                                                                                                                                                                                                                                                                                                                                                                                                                                                                                                                                                                                         |
| Manuscript ID:                  | bmjopen-2013-003845.R2                                                                                                                                                                                                                                                                                                                                                                                                                                                                                                                                                                                                                                                                                                                                  |
| Article Type:                   | Research                                                                                                                                                                                                                                                                                                                                                                                                                                                                                                                                                                                                                                                                                                                                                |
| Date Submitted by the Author:   | 19-Dec-2013                                                                                                                                                                                                                                                                                                                                                                                                                                                                                                                                                                                                                                                                                                                                             |
| Complete List of Authors:       | Duke, Janine; University of Western Australia, School of Surgery, Burn Injury Research Unit<br>Bauer, Jacqui; Curtin University, Population Health Research Network, Centre for Data Linkage<br>Fear, Mark; University of Western Australia, School of Surgery, Burn Injury Research Unit<br>Rea, Suzanne; University of Western Australia, School of Surgery, Burn Injury Research Unit; Burns Service of Western Australia, Royal Perth and Princess Margaret Hospitals<br>Wood, Fiona; University of Western Australia, School of Surgery, Burn Injury Research Unit; Burns Service of Western Australia, Royal Perth and Princess Margaret Hospitals<br>Boyd, James; Curtin University, Population Health Research Network, Centre for Data Linkage |
| <b>Primary Subject Heading</b>: | Epidemiology                                                                                                                                                                                                                                                                                                                                                                                                                                                                                                                                                                                                                                                                                                                                            |
| Secondary Subject Heading:      | Research methods                                                                                                                                                                                                                                                                                                                                                                                                                                                                                                                                                                                                                                                                                                                                        |
| Keywords:                       | Health informatics < BIOTECHNOLOGY & BIOINFORMATICS, EPIDEMIOLOGY, International health services < HEALTH SERVICES ADMINISTRATION & MANAGEMENT, Epidemiology < ONCOLOGY, PUBLIC HEALTH                                                                                                                                                                                                                                                                                                                                                                                                                                                                                                                                                                  |
|                                 |                                                                                                                                                                                                                                                                                                                                                                                                                                                                                                                                                                                                                                                                                                                                                         |

SCHOLARONE™  
Manuscripts

1  
2  
3 **Burn injury, gender and cancer risk: population-based cohort study using data from Scotland and**  
4 **Western Australia**  
5

6 Janine M. Duke,<sup>1</sup> Jacqui Bauer,<sup>2</sup> Mark W. Fear,<sup>1</sup> Suzanne Rea,<sup>1,3</sup> Fiona M. Wood,<sup>1,3,4</sup> James Boyd  
7  
8 <sup>2</sup>

- 9  
10 1. Burn Injury Research Unit, School of Surgery, University of Western Australia, Western  
11 Australia  
12  
13 2. Population Health Research Network, Centre for Data Linkage, Curtin University, Western  
14 Australia  
15  
16 3. Burns Service of Western Australia, Royal Perth Hospital and Princess Margaret Hospital,  
17 Western Australia  
18  
19 4. Fiona Wood Foundation, Western Australia  
20  
21  
22  
23

24 **Authors:**  
25

- 26  
27 1. Janine M. Duke  
28 Associate Professor  
29

30  
31 Burn Injury Research Unit, School of Surgery, Faculty of Medicine, Dentistry and Health Sciences, The  
32 University of Western Australia, M318 35 Stirling Highway, Crawley, 6009, Western Australia  
33

- 34  
35 2. Jacqui Bauer  
36 Research Associate  
37

38  
39 Population Health Research Network, Centre for Data Linkage, Curtin University, Perth, 6845,  
40 Western Australia  
41

- 42  
43 3. Mark W. Fear  
44 Associate Professor  
45

46  
47 Burn Injury Research Unit, School of Surgery, Faculty of Medicine, Dentistry and Health Sciences, The  
48 University of Western Australia, M318 35 Stirling Highway, Crawley, 6009, Western Australia  
49

- 50  
51 4. Suzanne Rea  
52 Professor, Burns Surgeon  
53

54  
55 Burns Service of Western Australia, Royal Perth Hospital and Princess Margaret Hospital, Perth 6000  
56  
57  
58  
59  
60

1  
2  
3 Burn Injury Research Unit, School of Surgery, Faculty of Medicine, Dentistry and Health Sciences, The  
4 University of Western Australia, M318 35 Stirling Highway, Crawley, 6009, Western Australia

5  
6  
7 5. Fiona M. Wood

8 Professor, Burns Surgeon, Director of Burns Service of Western Australia

9  
10  
11 Burn Injury Research Unit, School of Surgery, Faculty of Medicine, Dentistry and Health Sciences, The  
12 University of Western Australia, M318 35 Stirling Highway, Crawley, 6009, Western Australia

13  
14 Burns Service of Western Australia, Royal Perth Hospital, Perth, Western Australia

15  
16  
17 Fiona Wood Foundation, Perth, Western Australia

18  
19 6. James Boyd

20 Associate Professor

21  
22  
23 Population Health Research Network, Centre for Data Linkage, Curtin University, Perth, 6845,  
24 Western Australia

25  
26  
27  
28  
29 **\*Address for correspondence:**

30 Associate Professor Janine M. Duke

31  
32  
33 Email: [janine.duke@uwa.edu.au](mailto:janine.duke@uwa.edu.au)

34  
35  
36 Article Word Count (Text only, excludes Abstract, References): 3,507

37  
38  
39 Number of Tables: 4

40  
41 The Corresponding Author has the right to grant on behalf of all authors and does grant on behalf of  
42 all authors, an exclusive licence (or non-exclusive for government employees) on a worldwide basis  
43 to the BMJ Publishing Group Ltd to permit this article (if accepted) to be published in BMJ editions  
44 and any other BMJPGJL products and sublicences such use and exploit all subsidiary rights, as set out  
45 in our licence.  
46  
47  
48  
49  
50  
51  
52  
53  
54  
55  
56  
57  
58  
59  
60

1  
2  
3 ***Burn injury, gender and cancer risk: population-based cohort study using data from***  
4 ***Scotland and Western Australia***  
5

6 **Abstract**  
7

8  
9 *Objective: To investigate risk of cancer and potential gender effects in persons hospitalised*  
10 *with burn injury.*  
11

12 *Design: Population-based retrospective cohort study using record-linkage systems in*  
13 *Scotland and Western Australia*  
14

15 *Subjects: Records of 37,890 and 23,450 persons admitted with a burn injury in Scotland and*  
16 *Western Australia, respectively, from 1983 to 2008. De-identified extraction of all linked*  
17 *hospital morbidity records, mortality and cancer records were provided by the Information*  
18 *Service Division Scotland and the Western Australian Data Linkage Service.*  
19  
20

21 *Main outcome measures: Total and gender specific numbers of observed and expected cases*  
22 *of total ('all sites') and site-specific cancers and standardised incidence ratios.*  
23  
24

25 *Results: From 1983-2008, for female burn survivors there was a greater number of observed*  
26 *versus expected notifications of total cancer with 1011 (standardised incidence ratio (SIR),*  
27 *95% confidence interval (CI): 1.3, 1.2 to 1.4) and 244 (SIR, 95%CI: 1.12, 1.05 to 1.30),*  
28 *respectively, for Scotland and Western Australia. No statistically significant difference in*  
29 *total cancer risk was found for males. Significant excesses in observed cancers amongst burn*  
30 *survivors (combined gender) in Scotland and Western Australian were found for buccal*  
31 *cavity, liver, larynx and respiratory tract, and for cancers of the female genital tract.*  
32  
33  
34

35 *Conclusions: Results from the Scotland data confirmed the increased risk of total ('all-sites')*  
36 *cancer previously observed amongst female burn survivors in Western Australia. The gender*  
37 *dimorphism observed in this study may be related to the role of gender in the immune*  
38 *response to burn injury. More research is required to understand the underlying*  
39 *mechanism(s) that may link burn injury with an increased risk of some cancers.*  
40  
41  
42  
43  
44  
45  
46  
47  
48  
49  
50  
51  
52  
53  
54  
55  
56  
57  
58  
59  
60

**Article Focus**

- Burn injury not only affects the skin but also has other systemic effects
- Inflammatory and immune response to burns may mediate cancer risk
- Gender differences in cancer risk after burn injury may be related to the immune response

**Key messages**

- Burn injury can have impacts on longer term health
- Increased risk of some cancers post-burn injury is greater in females than males

**Strengths and Limitations**

- Population-level linked administrative data minimises issues of selection and reporting bias, and loss to follow-up
- Consistency of results using population-level data from two patient populations provides greater support for link between burn injury and some cancers
- Unable to examine impact of burn severity on cancer risk due to lack of available data

## Burn injury, gender and cancer risk: population-based cohort study using data from Scotland and Western Australia

### 1. Introduction

The burden of burn injury is a significant issue, not only in terms of the acute care perspective but also the chronic health effects resulting from both the injury event and the subsequent treatments. While burns predominantly affect the skin, burns are associated with significant systemic effects<sup>1-3</sup>, depressed immune functioning<sup>4-8</sup> and prolonged periods of systemic catabolism and hypermetabolism.<sup>9</sup> Prompted by a clinical scenario of a diagnosis of hepatocellular carcinoma in a young male burn patient,<sup>10</sup> and the potential for malignancy after burn, an initial study of burn injury and total (all-sites) cancer risk was undertaken.<sup>11</sup>

Results of our initial study demonstrated a gender effect with female burn survivors having an increased risk of all types of cancer.<sup>11</sup> In contrast to our results, a Swedish population-based study<sup>12</sup> of linked burn patient hospitalisation records and cancer registrations reported the risk of developing any form of cancer, for combined gender, was increased (SIR, 95%CI: 1.11, 1.06-1.16), with the risk of lung cancer also significantly increased (SIR, 95%CI: 1.39, 1.21-1.59). However, a Danish study of burn patients<sup>13</sup> found no significant increases in cancer (combined gender) for all malignant neoplasms including all skin cancers (SIR, 95%CI: 0.99, 0.93-1.06).

This previous study of burn injury and cancer risk used population-based data linked by the Western Australian Data Linkage System (WADLS).<sup>14</sup> Western Australia has a population of approximately 2.2 million, and as such, did not support detailed gender and site-specific cancer incidence assessments with adequate statistical power. While the WADLS has linked datasets of Western Australians since the 1970s, other Australian States have only recently established record linkage systems and were not able to support this study. To extend the population-base and enable further detailed examination of the observed gender effect and site specific cancer incidence, approval was sought to access the Scottish population-based record linkage system, the Information Service Division (ISD) Scotland,<sup>15</sup> that has routinely linked health data since the 1980s.

This paper reports a retrospective longitudinal study to explore cancer risk after burn injury using linked hospital morbidity, cancer and death data of persons hospitalised for burn injury in both Western Australia and Scotland. The study aimed to, firstly, confirm the increased risk of total ('all-sites') cancer observed in the preliminary Western Australian study of female burn survivors using the Scottish data; and, secondly, examine site-specific cancer risk amongst survivors of burn injury.

## 2. Methods

Study data were obtained from the Western Australian Data Linkage Service (WADLS)<sup>14</sup> and the Information and Services Division (ISD Scotland) of the National Health Service National Services Scotland<sup>15</sup> with approval from Curtin University, the Western Australia Department of Health Human Research Ethics Committees and the NHS National Services Scotland Privacy Advisory Committee. The WADLS and ISD Scotland are validated record linkage systems that routinely link administrative health data from core datasets for the entire population of Western Australia and Scotland, respectively.

An index burn injury was defined as the first hospital admission with a burn injury using primary and additional diagnosis International Classification of Diseases (ICD) codes 940-949 (ICD9) and T20-T31 (ICD10). A de-identified extraction of all linked hospital morbidity records (Hospital Morbidity Data System (HMDS), mortality (Death Register, Western Australia) and cancer records (Western Australia Cancer Registry (WACR)) for all persons admitted to hospital with an index burn injury in Western Australia, for the period 1 January 1983 to 31 December 2008, was performed by WADLS<sup>16</sup>. A corresponding de-identified extraction of all linked hospital morbidity records (Scottish Morbidity Records (SMR) 01), cancer registrations (SMR06) and death records (General Register Office for Scotland (GROS)) using the same burn cohort definition was undertaken by ISD Scotland. Hospital admissions data items included age at admission, gender, admission date, separation (or discharge) date, principal and additional diagnoses and external cause of injury.

The Western Australia Cancer Registry (WACR) was established in 1981 and is a population-based cancer registry based on mandatory notification of cancers from pathologists, haematologists and radiation oncologist, and cancer information from death records.<sup>17</sup> Malignant cancers are coded according to a modified Australian version of the International Classification of Diseases, Tenth Revision (ICD10-AM) and International Classification of Diseases for Oncology (ICD-O-3).

The Scotland Cancer Registry (SMR06) has recorded all incident cancers in Scotland from 1958, and since 1997 registration has been centralised at ISD Scotland.<sup>18</sup> The registry is responsible for the collection of information on all new cases of primary malignant neoplasms, carcinoma in situ (including grade III intra-epithelial neoplasia), neoplasms of uncertain behaviour and (since 1 January 2000) benign brain and spinal cord tumours arising in residents of Scotland. Data quality is monitored using routine indicators, computer validation and ad hoc studies of data accuracy and completeness of ascertainment.<sup>19 20</sup> The Scottish cancer notifications are coded using the International Classification of Diseases (ICD version 10) and the International Classification of Diseases for Oncology (ICD-O).



1  
2  
3 Methods for analysis have been previously published.<sup>11</sup> An incident cancer was defined as a cancer  
4 diagnosis notification (C00-C96, excluding C44) after hospital admission for index burn injury.  
5 Analysis was restricted to malignant neoplasm notifications (C00-C96, excluding C44) for which total  
6 (all-sites) and site-specific cancer incident rates were provided by WACR and ISD Scotland for  
7 respective populations. Records were excluded from the analysis if the date of cancer diagnosis was  
8 prior to date of discharge for index burn hospitalisation. When a record was identified as having  
9 more than one malignant neoplasm notification, each neoplasm was counted as an individual  
10 record, however, if multiple tumours of the skin (C43) with identical morphological characteristics  
11 (that is, the first three digits ICD-O-3 morphology code) were identified, they were recorded only  
12 once. Gender and age-specific cancer (total C00-C96, excluding C44) incident rates for the Western  
13 Australian and Scottish populations were pooled for the calendar periods 1983-1988, 1989-1993,  
14 1994-1998, 1999-2003 and 2004-2008 to allow for changes in population cancer incidence during  
15 the study period.

16  
17 For the determination of incident rates, the calculation of person-years began on the day of final  
18 hospital discharge for the index burn admission and the study observation period continued until  
19 date of the defined cancer diagnosis, death, or 31<sup>st</sup> December 2008, whichever occurred first.  
20 Individual calculations were conducted for total (all-sites) and site-specific cancers. The observed  
21 numbers of cases of cancer and person-years at risk were calculated by age (5-year age groups),  
22 gender and calendar period (1983-1988, 1989-1993, 1994-1998, 1999-2003 and 2004-2008). The  
23 expected numbers of cancer cases were estimated by multiplying the specific number of person  
24 years per category by the corresponding incidence of cancer in Western Australia, Scotland, and  
25 combined cancer incidence rates, provided by WACR and ISD Scotland. The Standardised Incident  
26 Ratios (SIRs) were calculated by dividing the observed number of cases by the number expected.<sup>21,22</sup>  
27 The 95% confidence intervals (95%CI) were defined under the assumption that the observed number  
28 of cancers followed the Poisson distribution.<sup>23</sup>

29  
30 Separate SIR analyses for total (all-sites) and site-specific cancers were conducted using country  
31 specific data for respective burn patient cohorts (all burn depth) for cohorts hospitalised from 1983-  
32 2008; total (all-sites) SIRs repeated for sub-cohorts of burn admissions from 1983-1987, with  
33 optimum follow-up time. To further explore the gender impact of burn injury on cancer risk, total  
34 (all-sites) cancer SIR analyses were repeated on age-restricted sub-cohorts classified to reflect  
35 reproductive age at admission for burn injury: <15 years; 15-49 years; and, ≥50 years. All statistical  
36 analyses were performed using Stata statistical software V 11 (StataCorp LP, College Station, Tex).

### 3. Results

1  
2  
3 As previously reported, in Western Australia from 1983 to 2008, there were 23,450 hospital index  
4 admissions for burn-related injury.<sup>16</sup> After exclusion of records with a history of cancer prior to  
5 separation date or death during hospital admission for burn, a total of 22,705 patient records were  
6 included in the analysis.<sup>11</sup> There were 673 patients with a first cancer notification after date of  
7 separation for burn injury hospitalisation, and with inclusion of multiple malignancies, 759 cancer  
8 notifications were included in the standardised incident ratio analyses as independent observations.  
9

10  
11  
12  
13 In Scotland from 1983-2008, there were a total of 37,890 persons hospitalised for an index burn-  
14 related injury. After exclusion of those with a history of cancer prior to separation date or death  
15 during hospital admission for burn, a total of 37,506 patients were included in the analysis. There  
16 were 2,005 patients with a first cancer notification after date of separation for burn injury  
17 hospitalisation, and with inclusion of multiple malignancies, 2,260 cancer notifications were included  
18 in the standardised incident ratio analyses as independent observations. Characteristics of the  
19 Western Australia and Scotland cohorts are presented in Table 1.  
20  
21  
22  
23

24  
25 The Western Australia cohort (1983-2008; combined gender) was followed for a total of 283,306  
26 person-years, with mean follow-up time of 12.3 years (range: >0 – 25.9 years). Mean follow-up time  
27 for those with a cancer notification was 9.4 years (range: >0 – 25.4) and for those with no cancer  
28 notification, 12.4 years (range: >0 – 25.9). The Scotland cohort (1983-2008; combined gender) was  
29 followed for a total of 474,489 person-years, with mean follow-up time of 12.6 years (range: 0 -26.0  
30 years). Mean follow-up time for those with a cancer notification was 9.4 years (range: >0-25.8) and  
31 for those with no cancer notification, 12.7 years (range: >0-26.0).  
32  
33  
34  
35

36  
37 For the Scottish cohort of burn injury patients (combined gender) there was marginal but significant  
38 difference (SIR, 95%CI: 1.09, 1.05-1.10) in the overall risk of cancer for persons with a burn injury  
39 hospitalisation for the period 1983 to 2008, compared with the general population of Scotland.  
40 While a significant increase of 30% in cancer risk was estimated for females there was no difference  
41 in cancer risk for males, when compared with the general population of Scotland (refer to Table 2).  
42 For the sub-cohort of burn injury patients 1983-1988, the total observed number of cases of cancer  
43 (n=838) was statistically significantly lower than expected (n=953.4) with SIR (95%CI) of 0.88 (0.82 to  
44 0.94), with males having a statistically significantly lower number of cases observed than expected.  
45 Refer to Table 2 for gender specific SIRs for total (all-sites) cancer for Scotland and Western  
46 Australian burn patients, hospitalised during 1983-1988 and 1983-2008.<sup>11</sup>  
47  
48  
49  
50  
51  
52

53  
54 Female genital cancers were grouped due to the small numbers of observed cancers in sub-groups in  
55 the Western Australian data and unstable SIR results. Statistically significant increases in observed  
56 genital (combined) cancers for female burn patients in both Western Australia and Scotland were  
57  
58  
59  
60

1  
2  
3 found. The increased breast cancer incidence was statistically significant amongst female burn  
4 survivors in Scotland. Statistically significant increases in cancer incidence for combined gender for  
5 both Western Australia and Scottish data were observed for cancers of the buccal cavity, liver and  
6 respiratory tract. Refer to Table 3 for gender and site-specific cancer SIRs. For each of these cancers,  
7 female burn survivors in both Western Australia and Scotland had higher incidence than males when  
8 compared with respective general population data. For the majority of site-specific cancers selected,  
9 female burn survivors in both Western Australia and Scotland had higher numbers of observed  
10 cancers than expected, with SIRs of similar magnitude. However, SIR results for Scottish data  
11 reached statistical significance, reflecting the larger population-base and respective higher number  
12 of cancer notifications.  
13

14  
15 Table 4 presents an SIR analyses of total (all-sites) cancer risk repeated on age-restricted sub-  
16 cohorts, classified to reflect reproductive age (<15 years; 15-49 years; and, ≥50 years) at admission  
17 for burn injury. For males in both WA and Scotland, no statistically significant differences were found  
18 across the three age groups. For female burn survivors in Scotland, the observed numbers of cancers  
19 total (all-sites) exceeded that expected for each of the three age groups, with statistically significant  
20 results observed for the age groups 15-49, and 50 years and older. In the Western Australia data,  
21 excess cancers were observed for those younger than 15 years and for those 50 years and older,  
22 with statistically significance reached for the older age group; for females 15-49 years at burn injury,  
23 no difference in observed and expected total (all-sites) cancer was found.  
24  
25

#### 26 27 28 29 30 31 32 33 34 35 **4. Discussion**

##### 36 37 **4.1 Methodological Issues**

38  
39 When population-level administrative data are used, data linkage minimises issues of selection and  
40 reporting bias, as well as loss to follow-up. Data quality of the Western Australia and Scottish Cancer  
41 Registers<sup>17 19 20</sup> and hospital morbidity datasets<sup>24 25</sup> are assessed continually for both accuracy and  
42 quality. Data of all index burn hospitalisations in Western Australia and Scotland from 1983 to 2008  
43 were analysed with follow-up time from discharge date, allowing for exclusion of prevalent cancers  
44 to support temporality of burn exposure and incident cancer. Cancer diagnoses from cancer  
45 registries in Western Australia and Scotland were independent of the record of burn injury in the  
46 respective hospital morbidity datasets. Minor burns treated in emergency departments were not  
47 included in the study. The burn patient cohorts under study are part of the respective reference  
48 populations, and as such, this may have a small diluting effect in the standardised incidence ratios.  
49 Using parallel datasets from Western Australia and Scotland, of populations 2.2 million and 5.5  
50  
51  
52  
53  
54  
55  
56  
57  
58  
59  
60

1  
2  
3 million, respectively, allowed examination of the consistency of results and trends across the  
4 populations.  
5

6  
7 The Western Australia hospital morbidity data records the principal diagnosis and up to 20  
8 additional diagnosis fields, whereas, the Scottish morbidity data includes the principal diagnosis and  
9 5 additional diagnosis fields. Consequent to the reduced number of additional diagnosis fields in the  
10 Scottish data, there was an absence of recorded supplementary total body surface area burned  
11 (TBSA%) data (ICD9 946; ICD10 T31) and greater use of ICD codes for burns to multiple regions of the  
12 body (ICD9 946; ICD10 T29) rather individual anatomic burn sites, reflected in Table 1 This limited  
13 both SIR analyses restricted to more severe burns of TBSA 20% or greater and incident rate ratio  
14 analysis to examine the effects of severity of burn injury (burn depth and TBSA%). Previous SIR  
15 analyses of total (all-sites) cancer risk in Western Australia showed similar trends in results for all  
16 burn patients (severe and non-severe).<sup>11</sup>  
17  
18  
19  
20  
21  
22

23 Although this study had a follow-up period of up to 26 years from the date of separation for  
24 admission for burn injury, the follow up period for many patients may not have provided sufficient  
25 observation time to enable identification of all potential malignancies, given the long latency period  
26 for many cancers. Further burn injury research is planned with comparison cohorts (non-burn  
27 trauma, no injury), using incidence rate ratio analyses to explore patient (including lifestyle factors  
28 such as smoking and alcohol) and injury factors associated with the observed cancer risk.  
29  
30  
31  
32

#### 33 **4.2 Findings**

34  
35 Analysis of ISD Scotland data confirmed the results of our previous study: a statistically significant  
36 increase in total (all-sites) cancer risk for female burn survivors with males experiencing no  
37 difference. The site specific analyses clearly showed statistically significant increases in the number  
38 of observed cancers for combined gender in both the Western Australia and Scottish data for the  
39 buccal cavity, larynx, liver, respiratory tract and oesophagus. There was also a general trend for  
40 increased cancer risk for a number of the selected types of cancers for females and statistically  
41 significant increases in female genital cancers. Sub group analyses, defined crudely by reproductive  
42 age, did not elucidate any clear patterns of the influence of oestrogen on cancer incidence, with  
43 female burn survivors in Scotland showing increased risk across all age groups. For female burn  
44 survivors in WA, an increased risk for total (all-sites) cancer was found for those younger than 15  
45 years (pre-pubescent) and 50 years and older (post-menopausal). The lack of gender difference for  
46 the sub-cohort of burn patients in Scotland 1983-88 for total (all-sites) cancer risk is difficult to  
47 explain. Possible reasons may include that females: sustained less severe (<20% TBSA) burns during  
48  
49  
50  
51  
52  
53  
54  
55  
56  
57  
58  
59  
60

1  
2  
3 this period; had less comorbidities; and / or had better lifestyle factors than females hospitalised for  
4 burns during the remainder of the study period.

5  
6 The site-specific analyses showed that whilst statistically significant increases in female genital  
7 cancers were found, there was also a general trend amongst female burn patients for excesses  
8 across a number of site-specific cancers examined, although these excesses did not always reach  
9 statistical significance, possibly due to small numbers. Statistically significant increases in the  
10 number of observed cancers for combined gender were found in both the Western Australia and  
11 Scottish data for the buccal cavity, larynx, liver, respiratory tract and oesophagus. These results are  
12 similar to those found in a Danish study<sup>13</sup> and may be related to tobacco or alcohol use amongst this  
13 patient population. However, it would be expected that inhalation injury may also increase the  
14 cancer risk of the upper and lower respiratory tract, and in the case of the diagnosis of  
15 hepatocellular cancer in a young male (12 years of age) burn patient in Western Australia,<sup>10</sup> tobacco  
16 or alcohol use would be most unlikely attributable agents. Interestingly, the results of no increase in  
17 skin melanoma risk after burn injury in this study support findings of other population-based  
18 studies.<sup>12 13</sup>

19  
20 An alternative explanation for this increased incidence in cancer post-burn may lie in the significant  
21 impact a burn injury has on the immune system, or the sustained oxidative and metabolic stress that  
22 are integral to the injury response. While burn injury predominantly affects the skin, it has been  
23 shown to cause significant depression of both humoral and cell-mediated immunity (CMI),<sup>7 26 27</sup>  
24 sustained elevated levels of oxidative stress<sup>28 29</sup> and prolonged elevation of hyper-metabolic and  
25 stress hormone levels.<sup>30 31</sup> These effects have been demonstrated to persist for up to 3 years post-  
26 injury and can lead to long-term systemic impacts on other organs of the body.<sup>1 2 32-36</sup> Severe burn  
27 injury has been demonstrated to induce endoplasmic reticulum (ER) stress, in particular, in the  
28 liver.<sup>37</sup> ER stress is a stress-response that initially facilitates cell survival but can switch to a pro-  
29 apoptotic signal with prolonged stress.<sup>37 38</sup> However, it has also been shown that the ER stress  
30 response can become maladaptive, facilitating adaptation to hypoxic environments and promoting  
31 tumour growth.<sup>38 39</sup> It is plausible that the array of host responses combined with the impact of the  
32 injury, therefore, creates an environment of increased susceptibility to cancer.

33  
34 In addition to the observed increase in some of the selected site-specific cancers, the data support  
35 evidence for a gender dimorphism (a systematic difference between individuals of different sex in  
36 the same species) in the response to burn injury. After burn injury, gender has been shown to be an  
37 important factor with respect to poorer outcomes for mortality<sup>40-43</sup> and improved prognosis for  
38 multiple organ dysfunction syndrome,<sup>44</sup> and sepsis,<sup>45</sup> for females compared to males. Similar gender-  
39 based differences have also been reported in animal studies of burn injury.<sup>46-50</sup>

1  
2  
3 The impact of gender with respect to outcomes after burn injury is largely thought to stem from  
4 well-established differences in immune biology. There is a substantial volume of published literature  
5 to support a gender dimorphism in the immune response<sup>51-54</sup> and sepsis<sup>45</sup> following injury that have  
6 impacts on health and mortality.<sup>41 42</sup> The majority of these studies support a more efficient and  
7 effective innate and adaptive immune responses in females, leading to more rapid clearance of  
8 infectious organisms driven by tissue resident cell populations.<sup>55</sup> This 'advantageous' response  
9 reduces the risk of infection in females compared to males<sup>55 56</sup> but leads to elevated risk of  
10 autoimmune disease.<sup>57</sup> This dimorphism was thought to arise largely due to the impact of oestrogen  
11 on immune function.<sup>58 59</sup> However, recent papers have demonstrated these differences are not  
12 completely ablated by ovariectomy (in animal models)<sup>55</sup> and others have shown that oestrogen can  
13 be deleterious to the immune response.<sup>60</sup> This suggests a role of other mediators, most likely  
14 expressed on the X-chromosome, in the maintenance of the differential immune response.<sup>61 62</sup> The  
15 evidence for gender differences in the immune response, both to thermal and other trauma, and its  
16 impact on outcomes is substantial. Here, the evidence of increased cancer incidence in selected  
17 types of cancer after burn injury, with a greater effect in females, suggests the systemic immune  
18 response to burn injury may be a mediator of cancer susceptibility.

## 29 **5. Conclusion**

30  
31 Using population-based linked data of all burn patients in both Western Australia and Scotland,  
32 consistent trends were found in excesses in cancer notifications for a range of selected site specific  
33 cancers with an elevated and more widespread increase in female burn patients. Overall, however,  
34 the increased cancer risk affected small proportions of the respective burn patient cohorts. More  
35 research is required to understand the underlying mechanism(s) that may link burn injury to an  
36 increased risk of some cancers and why this is elevated in females, which may in turn enable  
37 identification of possible sites for intervention.  
38  
39  
40  
41  
42  
43  
44  
45  
46  
47  
48  
49  
50  
51  
52  
53  
54  
55  
56  
57  
58  
59  
60

### Acknowledgements

The authors thank the staff of both the Health Information Linkage Branch for access to the Western Australian Data Linkage System and Scottish Record Linkage team for their assistance in obtaining the data and providing advice on aspects of coding. Furthermore, the authors would like to thank the WA Health Data Custodians for access to the core health datasets and both the Western Australian Department of Health and ISD Scotland for their assistance and advice. Project data costs were supported by an Australian National Health and Medical Research Council research grant and a Raine Medical Research Foundation Priming grant. J.M.D Senior Research Fellowship is supported by Woodside corporate sponsorship via the Fiona Wood Foundation.

Funding support: This research received no specific funding. Project data costs were supported by an Australian National Health and Medical Research Council research grant and a Raine Medical Research Foundation Priming grant. J.M.D. Senior Research Fellowship is supported by Woodside corporate sponsorship via the Fiona Wood Foundation.

#### Contributions:

Janine Duke: Planning, conduct and reporting

James Boyd: Planning, conduct and reporting

Jacqui Bauer: Conduct and reporting

Mark Fear: Reporting

Suzanne Rea: Reporting

Fiona Wood: Reporting

#### Guarantors:

Janine Duke

James Boyd

Conflict of Interest Statement: All authors declare: no support from any organisation for the submitted work; no financial relationships with any organisations that might have an interest in the submitted work in the previous three years, no other relationships or activities that could appear to have influenced the submitted work.

Data sharing statement: No additional unpublished data from the study are available.



**Table 1** Characteristics of burn injury patients included in analyses with no record of cancer prior to separation date of index burn admission, 1983-2008, by country.

| Characteristics                       | Western Australia<br>N (%) | Scotland<br>N (%) |
|---------------------------------------|----------------------------|-------------------|
| <b>Total number burn admissions*</b>  | 22,705                     | 37,506            |
| <b>Gender: Male</b>                   | 15,481 (68.2)              | 23,896 (63.7)     |
| <b>Age at index admission (Years)</b> |                            |                   |
| <15                                   | 8,135 (35.8)               | 14,579 (38.9)     |
| 15-24                                 | 4,364 (19.2)               | 4,495 (12.0)      |
| 25-49                                 | 7,147 (31.5)               | 9,554 (25.5)      |
| 50-64                                 | 1,736 (7.7)                | 4,080 (10.9)      |
| 65+                                   | 1,323 (5.8)                | 4,798 (12.8)      |
| <b>Site of burn**</b>                 |                            |                   |
| Head and neck                         | 6,784 (15.4)               | 7,592 (16.1)      |
| Trunk                                 | 7,553 (17.2)               | 8,815 (21.0)      |
| Hand, wrist, upper limb               | 15,801 (35.9)              | 6,984 (14.8)      |
| Hip , lower limb                      | 11,798 (26.8)              | 9,531 (3.4)       |
| Eye                                   | 379 (0.9)                  | 1,087 (2.3)       |
| Respiratory tract                     | 212 (0.5)                  | 163 (0.3)         |
| Other internal organs                 | 124 (0.3)                  | 165 (0.3)         |
| Multiple regions                      | 656 (1.5)                  | 3,677 (7.8)       |
| Unspecified region                    | 694 (1.6)                  | 858 (1.8)         |
| <b>Burn site depth**</b>              |                            |                   |
| Erythema                              | 8,929 (20.9)               | 4,815 (11.5)      |
| Partial thickness                     | 18,449 (41.9)              | 6,302 (15.0)      |
| Full thickness                        | 7,095 (16.1)               | 4,924 (11.7)      |
| Unspecified                           | 9,528 (21.7)               | 25,869 (61.7)     |
| <b>Calendar period of admission</b>   |                            |                   |
| 1983-1988                             | 5,431 (23.9)               | 11,507 (30.7)     |
| 1989-1993                             | 4,200 (18.5)               | 7,876 (21.0)      |
| 1994-1998                             | 4,755 (20.9)               | 7,130 (19.0)      |
| 1999-2003                             | 4,265 (18.9)               | 5,980 (15.9)      |
| 2004-2008                             | 4,054 (17.9)               | 5,013 (13.4)      |
| <b>Any co-morbidity at index burn</b> |                            |                   |
| <b>Yes</b>                            | 2,798 (12.3)               | 7,679 (20.5)      |

\* No previous record of cancer

\*\* Patients may have multiple burn sites per anatomical region per depth



**Table 2** Standardised incidence ratios and 95% confidence intervals and observed and expected numbers for total (all-sites) cancer in persons hospitalised for burn injury in Western Australia and Scotland, during the periods 1983-2008 and 1983-1988.

|                                   | Western Australia††             |                                |                                | Scotland                            |                                    |                                 |
|-----------------------------------|---------------------------------|--------------------------------|--------------------------------|-------------------------------------|------------------------------------|---------------------------------|
|                                   | Combined<br>SIR 95%CI*<br>O:E** | Male†<br>SIR 95%CI<br>O:E      | Female†<br>SIR 95%CI<br>O:E    | Combined<br>SIR 95%CI<br>O:E        | Male†<br>SIR 95%CI<br>O:E          | Female†<br>SIR 95%CI<br>O:E     |
| <b>Total cohort<br/>1983-2008</b> | 0.97 (0.9 to 1.0)<br>759: 785.5 | 0.9 (0.8 to 1.0)<br>515: 569.5 | 1.1 (1.0 to 1.3)<br>244: 216.0 | 1.09 (1.05 to 1.10)<br>2260: 2075.9 | 0.96 (0.90 to 1.0)<br>1249: 1303.2 | 1.3 (1.2 to 1.4)<br>1011: 772.6 |
| <b>Sub-cohort<br/>1983-1988</b>   | 1.0 (0.9 to 1.1)<br>294:294.9   | 0.9 (0.8 to 1.0)<br>190:220.3  | 1.4 (1.1 to 1.7)<br>104: 74.6  | 0.9 (0.8 to 0.9)<br>838: 953.4      | 0.8 (0.7 to 0.9)<br>491: 614.3     | 1.0 (0.9 to 1.2)<br>347: 339.1  |

\*SIR (95%CI): Standardised Incidence Ratio (95% confidence interval) adjusted for age and gender

\*\* O: E: Observed: Expected

†SIR (95%CI): Standardised Incidence Ratio (95% confidence interval) adjusted for age

†† Western Australian comparison data Duke et al. Burns 2011; 38:340-47.

**Table 3** Standardised incidence ratios and 95% confidence intervals and observed and expected numbers for selected types of cancer in persons hospitalised for burns Western Australia and Scotland, 1983-2008.

| Cancer Site<br>ICD-10‡                                    | Western Australia               |                                |                              | Scotland                       |                                |                                |
|-----------------------------------------------------------|---------------------------------|--------------------------------|------------------------------|--------------------------------|--------------------------------|--------------------------------|
|                                                           | Combined<br>SIR 95%CI*<br>O:E** | Male<br>SIR 95%CI†<br>O:E      | Female<br>SIR 95%CI†<br>O:E  | Combined<br>SIR 95%CI*<br>O:E  | Male<br>SIR 95%CI†<br>O:E      | Female<br>SIR 95%CI†<br>O:E    |
| <b>Buccal cavity<br/>C00 to C14</b>                       | 1.4 (1.03 to 1.9)<br>45: 32.6   | 1.4 (1.0 to 1.9)               | 1.5 (0.7 to 3.2)<br>7: 4.6   | 2.6 (2.2 to 3.1)<br>117: 45.0  | 2.4 (1.9 to 2.9)<br>83: 35.1   | 3.4 (2.5 to 4.8)<br>34:9.9     |
| <b>Oesophagus<br/>C15</b>                                 | 1.4 (0.9 to 2.4)<br>15:10.50    | 1.5 (0.9 to 2.6)<br>13: 8.7    | 1.1 (0.3 to 4.5)<br>2: 1.8   | 1.6 (1.3 to 2.0)<br>82: 51.4   | 1.5 (1.1 to 1.9)<br>53:36.1    | 1.9 (1.3 to 2.7)<br>29:15.3    |
| <b>Stomach<br/>C16</b>                                    | 0.6 (0.3 to 1.1)<br>10:17.0     | 0.5 (0.2 to 1.1)<br>7: 13.4    | 0.8 (0.3 to 2.6)<br>3: 3.6   | 1.2 (0.9 to 1.5)<br>73:63.2    | 1.1 (0.8 to 1.5)<br>1.2 5: 2.8 | 1.3 (0.9 to 1.9)<br>25:19.5    |
| <b>Colorectal<br/>C18 to C20</b>                          | 0.7 (0.6 to 0.9)<br>69: 96.3    | 0.7 (0.5 to 0.9)<br>45: 69.1   | 0.9 (0.6 to 1.3)<br>24: 27.2 | 1.2 (1.1 to 1.4)<br>268:221.8  | 1.0 (0.9 to 1.2)<br>142:140.5  | 1.4 (1.3 to 1.8)<br>125: 81.3  |
| <b>Liver<br/>C22</b>                                      | 2.6 (1.6 to 4.0)<br>19: 7.4     | 2.2 (1.3 to 3.7)<br>14: 6.3    | 4.7 (2.0 to 11.4)<br>5: 1.1  | 1.7 (1.2 to 2.5)<br>31:18.0    | 1.5 (1.1 to 2.5)<br>22: 13.3   | 1.9 (1.0 to 3.7)<br>9: 4.7     |
| <b>Pancreas<br/>C25</b>                                   | 0.7 (0.4 to 1.3)<br>11: 15.3    | 0.9 (0.5 to 1.7)<br>9: 10.4    | 0.4 (0.1 to 1.6)<br>2: 5.0   | 1.1 (0.8 to 1.5)<br>44:39.6    | 1.5 (1.03 to 2.0)<br>34: 23.4  | 0.6 (0.3 to 1.2)<br>10: 16.2   |
| <b>Larynx<br/>C32</b>                                     | 5.7 (0.9 to 3.3)<br>10: 5.7     | 1.5 (0.7 to 3.0)<br>8: 5.4     | 6.0 (1.5 to 24.1)<br>2: 0.3  | 1.9 (1.4 to 2.5)<br>39: 21.1   | 1.5 (1.1 to 2.2)<br>28: 18.5   | 4.2(2.3 to 7.7)<br>11:2.6      |
| <b>Respiratory tract<br/>C33 to C34</b>                   | 1.4 (1.1 to 1.6)<br>101: 74.8   | 1.3 (1.1 to 1.7)<br>79:59.3    | 1.4 (0.9 to 2.2)<br>22:15.4  | 1.5 (1.4 to 1.7)<br>448:298.1  | 1.3 (1.2 to 1.5)<br>279:210.4  | 1.9 (1.7 to 2.2)<br>169:87.7   |
| <b>Skin – malignant<br/>melanoma<br/>C43</b>              | 0.7 (0.6 to 0.9)<br>72: 102.0   | 0.7 (0.6 to 1.0)<br>57: 77.9   | 0.6 (0.4 to 1.0)<br>15: 24.1 | 0.8 (0.6 to 1.1)<br>38:48.5    | 0.7 (0.4 to 1.1)<br>19:28.4    | 1.0 (0.4 to 1.1)<br>19:20.0    |
| <b>Breast<br/>C50</b>                                     | 1.0 (0.8 to 1.3)<br>65: 62.4    | 1.3 (0.2 to 9.2)<br>1: 0.8     | 1.0 (0.8 to 1.3)<br>64:61.7  | 1.7 (1.5 to 1.9)<br>271:161.4  | 0.7 (0.1 to 4.8)<br>1:1.5      | 1.6 (1.5 to 1.9)<br>270: 160.0 |
| <b>Female genital<br/>tract (combined)<br/>C51 to C57</b> |                                 |                                | 1.4 (1.0 to 2.0)<br>31:26.7  |                                |                                | 1.7 (1.4 to 2.0)<br>114: 67.2  |
| <b>Male genital<br/>tract (combined)<br/>C60 to C63</b>   |                                 | 0.9 (0.8 to 1.1)<br>141: 150.7 |                              |                                | 1.1 (1.0 to 1.3)<br>210: 192.6 |                                |
| <b>Prostate<br/>C61</b>                                   |                                 | 0.8 (0.6 to 0.9)<br>102: 135.9 |                              |                                | 1.1 (0.9 to 1.2)<br>177: 165.5 |                                |
| <b>Kidney, Bladder,<br/>UT C64 to C68</b>                 | 0.5 (0.3 to 0.7)<br>17: 37.9    | 0.4 (0.2 to 0.7)<br>12: 30.9   | 0.7 (0.3 to 1.7)<br>5: 7.0   | 1.2 (1.0 to 1.4)<br>135: 110.9 | 1.2 (1.0 to 1.4)<br>96: 82.8   | 1.4 (1.0 to 1.9)<br>39: 28.0   |
| <b>Brain<br/>C71</b>                                      | 1.2 (0.7 to 1.9)<br>16: 13.9    | 1.0 (0.5 to 1.8)<br>10: 10.5   | 1.7 (0.8 to 3.9)<br>6: 3.5   | 1.5 (1.1 to 2.0)<br>39:27.0    | 1.4 (0.9 to 2.0)<br>26:19.2    | 1.7 (1.0 to 2.9)<br>13:7.8     |
| <b>Lymphomas to<br/>all</b>                               | 1.0 (0.7 to 1.4)<br>36: 35.5    | 0.8 (0.5 to 1.2)<br>20: 26.0   | 1.7 (1.03 to 2.7)<br>16:9.6  | 1.1 (0.9 to 1.4)<br>75:68.0    | 1.1 (0.8 to 1.4)<br>48:45.0    | 1.2 (0.8 to 1.7)<br>27:23.0    |
| <b>Myeloma/<br/>plasma</b>                                | 1.3 (0.7 to 2.3)<br>11: 8.6     | 1.3 (0.7 to 2.6)<br>8:6.1      | 1.2 (0.4 to 3.7)<br>3: 2.49  | 1.1 (0.7 to 1.6)<br>22:21.0    | 1.0 (0.6 to 1.7)<br>13:13.2    | 1.2 (0.6 to 2.2)<br>9: 7.8     |
| <b>Leukaemia's to<br/>all</b>                             | 1.1 (0.8 to 1.7)<br>26: 22.9    | 1.1 (0.7 to 1.8)<br>19: 17.0   | 1.2 (0.6 to 2.5)<br>7: 6.0   | 1.3 (1.01 to 1.7)<br>63:48.6   | 1.0 (0.73 to 1.4)<br>34:33.1   | 1.8 (1.3 to 2.7)<br>29: 15.5   |

\*SIR (95%CI): Standardised Incidence Ratio adjusted for age and gender (95% confidence interval)

\*\* O: E: Observed: Expected

†SIR (95%CI): Standardised Incidence Ratio adjusted for age (95% confidence interval)

‡ ICD-10: International Classification of Disease s (ICD) version 10

**Table 4** Standardised incidence ratios and 95% confidence intervals and observed and expected numbers for total (all-sites) cancer incidence, for persons hospitalised for burns Western Australia and Scotland, by age group, 1983 to 1988.

| Age at first burn years | SIR (95%CI)<br>(observed: expected)  |                                      |                                      |
|-------------------------|--------------------------------------|--------------------------------------|--------------------------------------|
|                         | combined gender*                     | Male†                                | Female†                              |
| <b>&lt;15</b>           |                                      |                                      |                                      |
| <b>WA</b>               | 1.17 (0.82 to 1.68)<br>(30:25)       | 1.19 (0.77 to 1.84)<br>(20:16)       | 1.15 (0.62 to 2.14)<br>(10:8.6)      |
| <b>Scotland</b>         | 0.94 (0.69 to 1.28)<br>(41:43.69)    | 0.72 (0.47 to 1.12)<br>(20:27.77)    | 1.32 (0.86 to 2.02)<br>(21:15.92)    |
| <b>15 to 49</b>         |                                      |                                      |                                      |
| <b>WA</b>               | 0.87 (0.77 to 0.99)<br>(273: 313)    | 0.87 (0.75 to 1.00)<br>(197: 226)    | 0.86 (0.69 to 1.1)<br>(76: 87)       |
| <b>Scotland</b>         | 1.21 (1.12 to 1.31)<br>(617: 509.16) | 1.04 (0.94 to 1.16)<br>(345: 331.68) | 1.53 (1.36 to 1.73)<br>(272: 177.48) |
| <b>≥ 50</b>             |                                      |                                      |                                      |
| <b>WA</b>               | 1.02 (0.93 to 1.12)<br>(456: 446)    | 0.91 (0.82 to 1.02)<br>(298: 326)    | 1.32 (1.13 to 1.54)<br>(158: 120)    |
| <b>Scotland</b>         | 1.05 (1.00 to 1.11)<br>(1602: 1523)  | 0.94 (0.88 to 1.00)<br>(884: 943.75) | 1.23 (1.15 to 1.33)<br>(718:579.25)  |

\*SIR (95%CI): Standardised Incidence Ratio adjusted for age and gender (95% confidence interval)

†SIR (95%CI): Standardised Incidence Ratio adjusted for age (95% confidence interval)

## References

1. Anderson JR, Zorbas JS, Phillips JK, et al. Systemic decreases in cutaneous innervation after burn injury. *Journal of Investigative Dermatology* 2010;130(7):1948-51.
2. Jeschke MG, Gauglitz GG, Kulp GA, et al. Long-term persistence of the pathophysiologic response to severe burn injury. *PLoS ONE [Electronic Resource]* 2011;6(7):e21245.
3. Rea S, Giles NL, Webb S, et al. Bone marrow-derived cells in the healing burn wound--more than just inflammation. *Burns* 2009;35(3):356-64.
4. Deveci M, Sengezer M, Bozkurt M, et al. Comparison of lymphocyte populations in cutaneous and electrical burn patients: a clinical study. *Burns* 2000;26(3):229-32.
5. Heideman M, Bengtsson A. The immunologic response to thermal injury. *World Journal of Surgery* 1992;16(1):53-6.
6. McGill SN, Cartotto RC. Herpes simplex virus infection in a paediatric burn patient: case report and review. *Burns* 2000;26(2):194-9.
7. O'Sullivan ST, O'Connor TP. Immunosuppression following thermal injury: the pathogenesis of immunodysfunction. *British Journal of Plastic Surgery* 1997;50(8):615-23.
8. Sjoberg T, Mzezewa S, Jonsson K, et al. Immune response in burn patients in relation to HIV infection and sepsis. *Burns* 2004;30(7):670-4.
9. Jeschke MG, Barrow RE, Herndon DN. Extended hypermetabolic response of the liver in severely burned pediatric patients. *Archives of Surgery* 2004;139(6):641-7.
10. Harper A, Rea S, Wood F. Hepatocellular carcinoma in a young survivor of major burns. *Burns* 2008;34(4):572-4.
11. Duke J, Rea S, Semmens J, et al. Burn Injury and cancer risk: A state-wide longitudinal study. *Burns* 2011;38:340-47.
12. Lindelof B, Krynitz B, Granath F, et al. Burn injuries and skin cancer: a population-based cohort study. *Acta Dermato-Venereologica* 2008;88(1):20-2.
13. Mellemkjaer L, Holmich LR, Gridley G, Rabkin C, Olsen JH. Risks for skin and other cancers up to 25 years after burn injuries. *Epidemiology* 2006;17(6):668-73.
14. Holman CDJ, Bass AJ, Rouse IL, et al. Population-based linkage of health records in Western Australia: development of a health service research linked database. *Australian and New Zealand Journal of Public Health* 1999;23(5):453-59.
15. Kendrick S, Clarke J. The Scottish Record Linkage System. *Health Bulletin* 1993;51(2):72-9.
16. Duke J, Wood F, Semmens J, et al. A 26-year population-based study of burn injury hospital admissions in Western Australia. *Journal of Burn Care & Research* 2011;32(3):379-86.
17. Threlfall T, Thompson JR. Cancer incidence and mortality in Western Australia, 2008. Statistical Series Number 87. Perth: Department of Health, Western Australia, 2010.
18. ISD Scotland. ISD Scotland, better information, better decisions, better health, 2010.
19. Brewster DH, Stockton D, Harvey J, et al. Reliability of cancer registration data in Scotland, 1997. *European Journal of Cancer* 2002;38(3):414-7.
20. Brewster DH, Stockton DL. Ascertainment of breast cancer by the Scottish Cancer Registry: an assessment based on comparison with five independent breast cancer trials databases. *Breast* 2008;17(1):104-6.
21. Gordis L. *Epidemiology* Second ed. Philadelphia: W.B. Saunders Company, 2000.
22. Verkasalo PK, Pukkala E, Kaprio J, et al. Magnetic fields of high voltage power lines and risk of cancer in Finnish adults: nationwide cohort study. *BMJ* 1996;313(7064):1047-51.
23. Bailar III J, Ederer F. Significance Factors for the Ratio of a Poisson Variable to Its Expectation. *Biometrics* 1964;20:639-43.
24. ISD Scotland. Assessment of SMR01 Data 2010-2011 Scotland Report May 2012. Edinburgh: NHS National Services Scotland, 2012.
25. Department of Health Western Australia. Clinical Information Audit Program - Hospital Activity Report. *Operational Directive OD 0201/09*. Perth Department of Health WA, 2009.

- 1
- 2
- 3 26. Horgan PG, Mannick JA, Dubravec DB, et al. Effect of low dose recombinant interleukin 2 plus
- 4 indomethacin on mortality after sepsis in a murine burn model. *British Journal of Surgery*
- 5 1990;77(4):401-4.
- 6 27. Schmand JF, Ayala A, Chaudry IH. Effects of trauma, duration of hypotension, and resuscitation
- 7 regimen on cellular immunity after hemorrhagic shock. *Critical Care Medicine*
- 8 1994;22(7):1076-83.
- 9 28. Liu D-m, Sun B-w, Sun Z-w, et al. Suppression of inflammatory cytokine production and oxidative
- 10 stress by CO-releasing molecules-liberated CO in the small intestine of thermally-injured
- 11 mice. *Zhongguo Yao Li Xue Bao/Acta Pharmacologica Sinica* 2008;29(7):838-46.
- 12 29. Shupp JW, Nasabzadeh TJ, Rosenthal DS, et al .A review of the local pathophysiologic bases of
- 13 burn wound progression. *Journal of Burn Care & Research* 2010;31(6):849-73.
- 14 30. Atiyeh BS, Gunn SWA, Dibo SA. Metabolic implications of severe burn injuries and their
- 15 management: a systematic review of the literature. *World Journal of Surgery*
- 16 2008;32(8):1857-69.
- 17 31. Williams FN, Herndon DN, Jeschke MG. The hypermetabolic response to burn injury and
- 18 interventions to modify this response. *Clinics in Plastic Surgery* 2009;36(4):583-96.
- 19 32. Ananthakrishnan P, Cohen DB, Xu DZ, et al. Sex hormones modulate distant organ injury in both
- 20 a trauma/hemorrhagic shock model and a burn model. *Surgery* 2005;137(1):56-65.
- 21 33. Dreschsler S, Weixelbaumer K, Raeven P, et al. Relationship between Age/Gender-Induced
- 22 Survival Changes and the Magnitude of Inflammatory Activation and Organ Dysfunction in
- 23 Post-Traumatic Sepsis. *PLoS ONE [Electronic Resource]* 2012;7(12):e5147.
- 24 34. Borue X, Lee S, Grove J, et al. Bone marrow-derived cells contribute to epithelial engraftment
- 25 during wound healing. *American Journal of Pathology* 2004;165(5):1767-72.
- 26 35. Fan Q, Yee CL, Ohyama M, Tock C, Zhang G, Darling TN, et al. Bone marrow-derived keratinocytes
- 27 are not detected in normal skin and only rarely detected in wounded skin in two different
- 28 murine models. *Experimental Hematology* 2006;34(5):672-9.
- 29 36. Harris RG, Herzog EL, Bruscia EM, et al. Lack of a fusion requirement for development of bone
- 30 marrow-derived epithelia. *Science* 2004;305(5680):90-3.
- 31 37. Jeschke MG, Finnerty CC, Herndon DN, et al. Severe injury is associated with insulin resistance,
- 32 endoplasmic reticulum stress response, and unfolded protein response. *Annals of Surgery*
- 33 2012;255(2):370-8.
- 34 38. Verfaillie T, Garg AD, Agostinis P. Targeting ER stress induced apoptosis and inflammation in
- 35 cancer. *Cancer Letters* 2013;332(2):249-64.
- 36 39. Wang S, Kaufman RJ. The impact of the unfolded protein response on human disease. *Journal of*
- 37 *Cell Biology* 2012;197(7):857-67.
- 38 40. George RL, McGwin G, Jr., Schwacha MG, et al. The association between sex and mortality
- 39 among burn patients as modified by age. *Journal of Burn Care & Rehabilitation*
- 40 2005;26(5):416-21.
- 41 41. Kerby JD, McGwin G, Jr., George RL, et al. Sex differences in mortality after burn injury: results of
- 42 analysis of the National Burn Repository of the American Burn Association. *Journal of Burn*
- 43 *Care & Research* 2006;27(4):452-6.
- 44 42. McGwin G, Jr., George RL, Cross JM, et al. Gender differences in mortality following burn injury.
- 45 *Shock* 2002;18(4):311-5.
- 46 43. O'Keefe GE, Hunt JL, Purdue GF. An evaluation of risk factors for mortality after burn trauma and
- 47 the identification of gender-dependent differences in outcomes. *Journal of the American*
- 48 *College of Surgeons* 2001;192(2):153-60.
- 49 44. Frink M, Pape H-C, van Griensven M, et al. Influence of sex and age on mods and cytokines after
- 50 multiple injuries. *Shock* 2007;27(2):151-6.
- 51 45. Schroder J, Kahlke V, Book M, et al. Gender differences in sepsis: genetically determined? *Shock*
- 52 2000;14(3):307-10; discussion 10-3.
- 53
- 54
- 55
- 56
- 57
- 58
- 59
- 60

- 1
- 2
- 3 46. Gregory MS, Duffner LA, Faunce DE, et al. Estrogen mediates the sex difference in post-burn
- 4 immunosuppression. *Journal of Endocrinology* 2000;164(2):129-38.
- 5 47. Gregory MS, Faunce DE, Duffner LA, et al. Gender difference in cell-mediated immunity after
- 6 thermal injury is mediated, in part, by elevated levels of interleukin-6. *Journal of Leukocyte*
- 7 *Biology* 2000;67(3):319-26.
- 8 48. Kahlke V, Angele MK, Ayala A, et al. Immune dysfunction following trauma-haemorrhage:
- 9 influence of gender and age. *Cytokine* 2000;12(1):69-77.
- 10 49. Kahlke V, Angele MK, Schwacha MG, et al. Reversal of sexual dimorphism in splenic T lymphocyte
- 11 responses after trauma-hemorrhage with aging. *American Journal of Physiology - Cell*
- 12 *Physiology* 2000;278(3):C509-16.
- 13 50. Plackett TP, Gamelli RL, Kovacs EJ. Gender-based differences in cytokine production after burn
- 14 injury: a role of interleukin-6. *Journal of the American College of Surgeons* 2010;210(1):73-8.
- 15 51. Croce MA, Fabian TC, Malhotra AK, et al. Does gender difference influence outcome? *Journal of*
- 16 *Trauma-Injury Infection & Critical Care* 2002;53(5):889-94.
- 17 52. Horton JW, White DJ, Maass DL. Gender-related differences in myocardial inflammatory and
- 18 contractile responses to major burn trauma. *American Journal of Physiology - Heart &*
- 19 *Circulatory Physiology* 2004;286(1):H202-13.
- 20 53. Mace JE, Park MS, Mora AG, et al. Differential expression of the immunoinflammatory response
- 21 in trauma patients: burn vs. non-burn. *Burns* 2012;38(4):599-606.
- 22 54. Verthelyi D. Sex hormones as immunomodulators in health and disease. *International*
- 23 *Immunopharmacology* 2001;1(6):983-93.
- 24 55. Scotland RS, Stables MJ, Madalli S, et al. Sex differences in resident immune cell phenotype
- 25 underlie more efficient acute inflammatory responses in female mice. *Blood*
- 26 2011;118(22):5918-27.
- 27 56. Sperry JL, Nathens AB, Frankel HL, et al. Characterization of the gender dimorphism after injury
- 28 and hemorrhagic shock: are hormonal differences responsible? *Critical Care Medicine*
- 29 2008;36(6):1838-45.
- 30 57. Ozcelik T. X chromosome inactivation and female predisposition to autoimmunity. *Clinical*
- 31 *Reviews in Allergy & Immunology* 2008;34(3):348-51.
- 32 58. Nicol T, Vernon-Roberts B, Quantock DC. Effect of orchidectomy and ovariectomy on survival
- 33 against lethal infections in mice. *Nature* 1966;211(5053):1091-2.
- 34 59. Paavonen T. Hormonal regulation of immune responses. *Annals of Medicine* 1994;26(4):255-8.
- 35 60. Rettew JA, Huet YM, Marriott I. Estrogens augment cell surface TLR4 expression on murine
- 36 macrophages and regulate sepsis susceptibility in vivo. *Endocrinology* 2009;150(8):3877-84.
- 37 61. Libert C, Dejager L, Pinheiro I. The X chromosome in immune functions: when a chromosome
- 38 makes the difference. *Nature Reviews. Immunology* 2010;10(8):594-604.
- 39 62. Pinheiro I, Dejager L, Libert C. X-chromosome-located microRNAs in immunity: might they
- 40 explain male/female differences? The X chromosome-genomic context may affect X-located
- 41 miRNAs and downstream signaling, thereby contributing to the enhanced immune response
- 42 of females. *Bioessays* 2011;33(11):791-802.
- 43
- 44
- 45
- 46
- 47
- 48
- 49
- 50
- 51
- 52
- 53
- 54
- 55
- 56
- 57
- 58
- 59
- 60

1  
2  
3 **Burn injury, gender and cancer risk: population-based cohort study using data from Scotland and**  
4 **Western Australia**  
5

6 Janine M. Duke,<sup>1</sup> Jacqui Bauer,<sup>2</sup> Mark W. Fear,<sup>1</sup> Suzanne Rea,<sup>1,3</sup> Fiona M. Wood,<sup>1,3,4</sup> James Boyd<sup>2</sup>  
7

- 8  
9  
10  
11  
12  
13  
14  
15  
16  
17  
18  
19  
20  
21  
22  
23  
24
1. Burn Injury Research Unit, School of Surgery, University of Western Australia, Western Australia
  2. Population Health Research Network, Centre for Data Linkage, Curtin University, Western Australia
  3. Burns Service of Western Australia, Royal Perth Hospital and Princess Margaret Hospital, Western Australia
  4. Fiona Wood Foundation, Western Australia

25  
26  
27  
28  
29  
30  
31  
32  
33  
34  
35  
36  
37  
38  
39  
40  
41  
42  
43  
44  
45  
46  
47  
48  
49  
50  
51  
52  
53  
54  
55  
56  
57  
58  
59  
60

**Authors:**

1. Janine M. Duke  
Associate Professor

Burn Injury Research Unit, School of Surgery, Faculty of Medicine, Dentistry and Health Sciences, The University of Western Australia, M318 35 Stirling Highway, Crawley, 6009, Western Australia

2. Jacqui Bauer  
Research Associate

Population Health Research Network, Centre for Data Linkage, Curtin University, Perth, 6845, Western Australia

3. Mark W. Fear  
Associate Professor

Burn Injury Research Unit, School of Surgery, Faculty of Medicine, Dentistry and Health Sciences, The University of Western Australia, M318 35 Stirling Highway, Crawley, 6009, Western Australia

4. Suzanne Rea  
Professor, Burns Surgeon

Burns Service of Western Australia, Royal Perth Hospital and Princess Margaret Hospital, Perth 6000

Burn Injury Research Unit, School of Surgery, Faculty of Medicine, Dentistry and Health Sciences, The University of Western Australia, M318 35 Stirling Highway, Crawley, 6009, Western Australia



1  
2  
3 5. Fiona M. Wood

4 Professor, Burns Surgeon, Director of Burns Service of Western Australia

6  
7 Burn Injury Research Unit, School of Surgery, Faculty of Medicine, Dentistry and Health Sciences, The

8 University of Western Australia, M318 35 Stirling Highway, Crawley, 6009, Western Australia

9  
10 Burns Service of Western Australia, Royal Perth Hospital, Perth, Western Australia11  
12 Fiona Wood Foundation, Perth, Western Australia13  
14  
15 6. James Boyd

16 Associate Professor

17  
18 Population Health Research Network, Centre for Data Linkage, Curtin University, Perth, 6845,19  
20 Western Australia21  
22  
23  
24  
25 **\*Address for correspondence:**

26 Associate Professor Janine M. Duke

27  
28  
29  
30 Email: [janine.duke@uwa.edu.au](mailto:janine.duke@uwa.edu.au)



1  
2  
3 **Funding support:** This research received no specific funding. Project data costs were supported by  
4 an Australian National Health and Medical Research Council research grant and a Raine Medical  
5 Research Foundation Priming grant. J.M.D. Senior Research Fellowship is supported by Woodside  
6 corporate sponsorship via the Fiona Wood Foundation.  
7  
8

9  
10 **Conflict of Interest Statement:** All authors declare: no support from any organisation for the  
11 submitted work; no financial relationships with any organisations that might have an interest in the  
12 submitted work in the previous three years, no other relationships or activities that could appear to  
13 have influenced the submitted work.  
14  
15

16  
17 **Article Word Count (Text only, excludes Abstract, References):** 3,507  
18

19  
20 **Number of Tables:** 4  
21

22 **Data sharing statement:** All authors have had access to the data  
23

24 The Corresponding Author has the right to grant on behalf of all authors and does grant on behalf of  
25 all authors, an exclusive licence (or non-exclusive for government employees) on a worldwide basis  
26 to the BMJ Publishing Group Ltd to permit this article (if accepted) to be published in BMJ editions  
27 and any other BMJ PGL products and sublicences such use and exploit all subsidiary rights, as set out  
28 in our licence.  
29  
30

31 **Contributions:**

32  
33 Janine Duke: Planning, conduct and reporting  
34

35 James Boyd: Planning, conduct and reporting  
36

37 Jacqui Bauer: Conduct and reporting  
38

39 Mark Fear: Reporting  
40

41 Suzanne Rea: Reporting  
42

43 Fiona Wood: Reporting  
44

45 **Guarantors:**

46  
47 Janine Duke  
48

49 James Boyd  
50  
51  
52  
53  
54  
55  
56  
57  
58  
59  
60

**Article Focus**

- Burn injury not only affects the skin but also has other systemic effects
- Inflammatory and immune response to burns may mediate cancer risk
- Gender differences in cancer risk after burn injury may be related to the immune response

**Key messages**

- Burn injury can have impacts on longer term health
- Increased risk of some cancers post-burn injury is greater in females than males

**Strengths and Limitations**

- Population-level linked administrative data minimises issues of selection and reporting bias, and loss to follow-up
- Consistency of results using population-level data from two patient populations provides greater support for link between burn injury and some cancers
- Unable to examine impact of burn severity on cancer risk due to lack of available data

1  
2  
3 **Burn injury, gender and cancer risk: population-based cohort study using data from Scotland and**  
4 **Western Australia**

5  
6 **Abstract**

7  
8 **Objective:** To investigate risk of cancer and potential gender effects in persons hospitalised with  
9 burn injury.

10  
11  
12 **Design:** Population-based retrospective cohort study using record-linkage systems in Scotland and  
13 Western Australia

14  
15  
16 **Subjects:** Records of 37,890 and 23,450 persons admitted with a burn injury in Scotland and  
17 Western Australia, respectively, from 1983 to 2008. De-identified extraction of all linked hospital  
18 morbidity records, mortality and cancer records were provided by the Information Service Division  
19 Scotland and the Western Australian Data Linkage Service.

20  
21  
22 **Main outcome measures:** Total and gender specific numbers of observed and expected cases of  
23 total ('all sites') and site-specific cancers and standardised incidence ratios.

24  
25  
26  
27 **Results:** From 1983-2008, for female burn survivors there was a greater number of observed versus  
28 expected notifications of total cancer with 1011 (standardised incidence ratio (SIR), 95% confidence  
29 interval (CI): 1.3, 1.2 to 1.4) and 244 (SIR, 95%CI: 1.12, 1.05 to 1.30), respectively, for Scotland and  
30 Western Australia. No statistically significant difference in total cancer risk was found for males.  
31 Significant excesses in observed cancers amongst burn survivors (combined gender) in Scotland and  
32 Western Australian were found for buccal cavity, liver, larynx and respiratory tract, and for cancers  
33 of the female genital tract.

34  
35  
36  
37  
38 **Conclusions:** Results from the Scotland data confirmed the increased risk of total ('all-sites') cancer  
39 previously observed amongst female burn survivors in Western Australia. The gender dimorphism  
40 observed in this study may be related to the role of gender in the immune response to burn injury.  
41 More research is required to understand the underlying mechanism(s) that may link burn injury with  
42 an increased risk of some cancers.  
43  
44  
45  
46  
47  
48  
49  
50  
51  
52  
53  
54  
55  
56  
57  
58  
59  
60

## Burn injury, gender and cancer risk: population-based cohort study using data from Scotland and Western Australia

### 1. Introduction

The burden of burn injury is a significant issue, not only in terms of the acute care perspective but also the chronic health effects resulting from both the injury event and the subsequent treatments. While burns predominantly affect the skin, burns are associated with significant systemic effects<sup>1-3</sup>, depressed immune functioning<sup>4-8</sup> and prolonged periods of systemic catabolism and hypermetabolism.<sup>9</sup> Prompted by a clinical scenario of a diagnosis of hepatocellular carcinoma in a young male burn patient,<sup>10</sup> and the potential for malignancy after burn, an initial study of burn injury and total (all-sites) cancer risk was undertaken.<sup>11</sup>

Results of our initial study demonstrated a gender effect with female burn survivors having an increased risk of all types of cancer.<sup>11</sup> In contrast to our results, a Swedish population-based study<sup>12</sup> of linked burn patient hospitalisation records and cancer registrations reported the risk of developing any form of cancer, for combined gender, was increased (SIR, 95%CI: 1.11, 1.06-1.16), with the risk of lung cancer also significantly increased (SIR, 95%CI: 1.39, 1.21-1.59). However, a Danish study of burn patients<sup>13</sup> found no significant increases in cancer (combined gender) for all malignant neoplasms including all skin cancers (SIR, 95%CI: 0.99, 0.93-1.06).

This previous study of burn injury and cancer risk used population-based data linked by the Western Australian Data Linkage System (WADLS).<sup>14</sup> Western Australia has a population of approximately 2.2 million, and as such, did not support detailed gender and site-specific cancer incidence assessments with adequate statistical power. While the WADLS has linked datasets of Western Australians since the 1970s, other Australian States have only recently established record linkage systems and were not able to support this study. To extend the population-base and enable further detailed examination of the observed gender effect and site specific cancer incidence, approval was sought to access the Scottish population-based record linkage system, the Information Service Division (ISD) Scotland,<sup>15</sup> that has routinely linked health data since the 1980s.

This paper reports a retrospective longitudinal study to explore cancer risk after burn injury using linked hospital morbidity, cancer and death data of persons hospitalised for burn injury in both Western Australia and Scotland. The study aimed to, firstly, confirm the increased risk of total ('all-sites') cancer observed in the preliminary Western Australian study of female burn survivors using the Scottish data; and, secondly, examine site-specific cancer risk amongst survivors of burn injury.

## 2. Methods

Study data were obtained from the Western Australian Data Linkage Service (WADLS)<sup>14</sup> and the Information and Services Division (ISD Scotland) of the National Health Service National Services Scotland<sup>15</sup> with approval from Curtin University, the Western Australia Department of Health Human Research Ethics Committees and the NHS National Services Scotland Privacy Advisory Committee. The WADLS and ISD Scotland are validated record linkage systems that routinely link administrative health data from core datasets for the entire population of Western Australia and Scotland, respectively.

An index burn injury was defined as the first hospital admission with a burn injury using primary and additional diagnosis International Classification of Diseases (ICD) codes 940-949 (ICD9) and T20-T31 (ICD10). A de-identified extraction of all linked hospital morbidity records (Hospital Morbidity Data System (HMDS), mortality (Death Register, Western Australia) and cancer records (Western Australia Cancer Registry (WACR)) for all persons admitted to hospital with an index burn injury in Western Australia, for the period 1 January 1983 to 31 December 2008, was performed by WADLS<sup>16</sup>. A corresponding de-identified extraction of all linked hospital morbidity records (Scottish Morbidity Records (SMR) 01), cancer registrations (SMR06) and death records (General Register Office for Scotland (GROS)) using the same burn cohort definition was undertaken by ISD Scotland. Hospital admissions data items included age at admission, gender, admission date, separation (or discharge) date, principal and additional diagnoses and external cause of injury.

The Western Australia Cancer Registry (WACR) was established in 1981 and is a population-based cancer registry based on mandatory notification of cancers from pathologists, haematologists and radiation oncologist, and cancer information from death records.<sup>17</sup> Malignant cancers are coded according to a modified Australian version of the International Classification of Diseases, Tenth Revision (ICD10-AM) and International Classification of Diseases for Oncology (ICD-O-3).

The Scotland Cancer Registry (SMR06) has recorded all incident cancers in Scotland from 1958, and since 1997 registration has been centralised at ISD Scotland.<sup>18</sup> The registry is responsible for the collection of information on all new cases of primary malignant neoplasms, carcinoma in situ (including grade III intra-epithelial neoplasia), neoplasms of uncertain behaviour and (since 1 January 2000) benign brain and spinal cord tumours arising in residents of Scotland. Data quality is monitored using routine indicators, computer validation and ad hoc studies of data accuracy and completeness of ascertainment.<sup>19 20</sup> The Scottish cancer notifications are coded using the International Classification of Diseases (ICD version 10) and the International Classification of Diseases for Oncology (ICD-O).

1  
2  
3 Methods for analysis have been previously published.<sup>11</sup> An incident cancer was defined as a cancer  
4 diagnosis notification (C00-C96, excluding C44) after hospital admission for index burn injury.  
5 Analysis was restricted to malignant neoplasm notifications (C00-C96, excluding C44) for which total  
6 (all-sites) and site-specific cancer incident rates were provided by WACR and ISD Scotland for  
7 respective populations. Records were excluded from the analysis if the date of cancer diagnosis was  
8 prior to date of discharge for index burn hospitalisation. When a record was identified as having  
9 more than one malignant neoplasm notification, each neoplasm was counted as an individual  
10 record, however, if multiple tumours of the skin (C43) with identical morphological characteristics  
11 (that is, the first three digits ICD-O-3 morphology code) were identified, they were recorded only  
12 once. Gender and age-specific cancer (total C00-C96, excluding C44) incident rates for the Western  
13 Australian and Scottish populations were pooled for the calendar periods 1983-1988, 1989-1993,  
14 1994-1998, 1999-2003 and 2004-2008 to allow for changes in population cancer incidence during  
15 the study period.

16  
17 For the determination of incident rates, the calculation of person-years began on the day of final  
18 hospital discharge for the index burn admission and the study observation period continued until  
19 date of **the defined** cancer diagnosis, death, or 31<sup>st</sup> December 2008, whichever occurred first.  
20 **Individual calculations were conducted for total (all-sites) and site-specific cancers.** The observed  
21 numbers of cases of cancer and person-years at risk were calculated by age (5-year age groups),  
22 gender and calendar period (1983-1988, 1989-1993, 1994-1998, 1999-2003 and 2004-2008). The  
23 expected numbers of cancer cases were estimated by multiplying the specific number of person  
24 years per category by the corresponding incidence of cancer in Western Australia, Scotland, and  
25 combined cancer incidence rates, provided by WACR and ISD Scotland. The Standardised Incident  
26 Ratios (SIRs) were calculated by dividing the observed number of cases by the number expected.<sup>21,22</sup>  
27 The 95% confidence intervals (95%CI) were defined under the assumption that the observed number  
28 of cancers followed the Poisson distribution.<sup>23</sup>

29  
30 Separate SIR analyses for total (all-sites) and site-specific cancers were conducted using country  
31 specific data for respective burn patient cohorts (all burn depth) for cohorts hospitalised from 1983-  
32 2008; total (all-sites) SIRs repeated for sub-cohorts of burn admissions from 1983-1987, with  
33 optimum follow-up time. To further explore the gender impact of burn injury on cancer risk, total  
34 (all-sites) cancer SIR analyses were repeated on age-restricted sub-cohorts classified to reflect  
35 reproductive age at admission for burn injury: <15 years; 15-49 years; and, ≥50 years. All statistical  
36 analyses were performed using Stata statistical software V 11 (StataCorp LP, College Station, Tex).

### 3. Results

1  
2  
3 As previously reported, in Western Australia from 1983 to 2008, there were 23,450 hospital index  
4 admissions for burn-related injury.<sup>16</sup> After exclusion of records with a history of cancer prior to  
5 separation date or death during hospital admission for burn, a total of 22,705 patient records were  
6 included in the analysis.<sup>11</sup> There were 673 patients with a first cancer notification after date of  
7 separation for burn injury hospitalisation, and with inclusion of multiple malignancies, 759 cancer  
8 notifications were included in the standardised incident ratio analyses as independent observations.  
9

10  
11  
12 In Scotland from 1983-2008, there were a total of 37,890 persons hospitalised for an index burn-  
13 related injury. After exclusion of those with a history of cancer prior to separation date or death  
14 during hospital admission for burn, a total of 37,506 patients were included in the analysis. There  
15 were 2,005 patients with a first cancer notification after date of separation for burn injury  
16 hospitalisation, and with inclusion of multiple malignancies, 2,260 cancer notifications were included  
17 in the standardised incident ratio analyses as independent observations. Characteristics of the  
18 Western Australia and Scotland cohorts are presented in Table 1.  
19

20  
21  
22 The Western Australia cohort (1983-2008; combined gender) was followed for a total of 283,306  
23 person-years, with mean follow-up time of 12.3 years (range: >0 – 25.9 years). Mean follow-up time  
24 for those with a cancer notification was 9.4 years (range: >0 – 25.4) and for those with no cancer  
25 notification, 12.4 years (range: >0 – 25.9). The Scotland cohort (1983-2008; combined gender) was  
26 followed for a total of 474,489 person-years, with mean follow-up time of 12.6 years (range: 0 -26.0  
27 years). Mean follow-up time for those with a cancer notification was 9.4 years (range: >0-25.8) and  
28 for those with no cancer notification, 12.7 years (range: >0-26.0).  
29

30  
31  
32 For the Scottish cohort of burn injury patients (combined gender) there was marginal but significant  
33 difference (SIR, 95%CI: 1.09, 1.05-1.10) in the overall risk of cancer for persons with a burn injury  
34 hospitalisation for the period 1983 to 2008, compared with the general population of Scotland.  
35 While a significant increase of 30% in cancer risk was estimated for females there was no difference  
36 in cancer risk for males, when compared with the general population of Scotland (refer to Table 2).  
37 For the sub-cohort of burn injury patients 1983-1988, the total observed number of cases of cancer  
38 (n=838) was statistically significantly lower than expected (n=953.4) with SIR (95%CI) of 0.88 (0.82 to  
39 0.94), with males having a statistically significantly lower number of cases observed than expected.  
40 Refer to Table 2 for gender specific SIRs for total (all-sites) cancer for Scotland and Western  
41 Australian burn patients, hospitalised during 1983-1988 and 1983-2008.<sup>11</sup>  
42

43  
44  
45 Female genital cancers were grouped due to the small numbers of observed cancers in sub-groups in  
46 the Western Australian data and unstable SIR results. Statistically significant increases in observed  
47 genital (combined) cancers for female burn patients in both Western Australia and Scotland were  
48  
49  
50  
51  
52  
53  
54  
55  
56  
57  
58  
59  
60

1  
2  
3 found. The increased breast cancer incidence was statistically significant amongst female burn  
4 survivors in Scotland. Statistically significant increases in cancer incidence for combined gender for  
5 both Western Australia and Scottish data were observed for cancers of the buccal cavity, liver and  
6 respiratory tract. Refer to Table 3 for gender and site-specific cancer SIRs. For each of these cancers,  
7 female burn survivors in both Western Australia and Scotland had higher incidence than males when  
8 compared with respective general population data. For the majority of site-specific cancers selected,  
9 female burn survivors in both Western Australia and Scotland had higher numbers of observed  
10 cancers than expected, with SIRs of similar magnitude. However, SIR results for Scottish data  
11 reached statistical significance, reflecting the larger population-base and respective higher number  
12 of cancer notifications.  
13

14  
15 Table 4 presents an SIR analyses of total (all-sites) cancer risk repeated on age-restricted sub-  
16 cohorts, classified to reflect reproductive age (<15 years; 15-49 years; and, ≥50 years) at admission  
17 for burn injury. For males in both WA and Scotland, no statistically significant differences were found  
18 across the three age groups. For female burn survivors in Scotland, the observed numbers of cancers  
19 total (all-sites) exceeded that expected for each of the three age groups, with statistically significant  
20 results observed for the age groups 15-49, and 50 years and older. In the Western Australia data,  
21 excess cancers were observed for those younger than 15 years and for those 50 years and older,  
22 with statistically significance reached for the older age group; for females 15-49 years at burn injury,  
23 no difference in observed and expected total (all-sites) cancer was found.  
24  
25

#### 26 27 28 29 30 31 32 33 34 35 **4. Discussion**

##### 36 37 **4.1 Methodological Issues**

38  
39 When population-level administrative data are used, data linkage minimises issues of selection and  
40 reporting bias, as well as loss to follow-up. Data quality of the Western Australia and Scottish Cancer  
41 Registers<sup>17 19 20</sup> and hospital morbidity datasets<sup>24 25</sup> are assessed continually for both accuracy and  
42 quality. Data of all index burn hospitalisations in Western Australia and Scotland from 1983 to 2008  
43 were analysed with follow-up time from discharge date, allowing for exclusion of prevalent cancers  
44 to support temporality of burn exposure and incident cancer. Cancer diagnoses from cancer  
45 registries in Western Australia and Scotland were independent of the record of burn injury in the  
46 respective hospital morbidity datasets. Minor burns treated in emergency departments were not  
47 included in the study. The burn patient cohorts under study are part of the respective reference  
48 populations, and as such, this may have a small diluting effect in the standardised incidence ratios.  
49 Using parallel datasets from Western Australia and Scotland, of populations 2.2 million and 5.5  
50  
51  
52  
53  
54  
55  
56  
57  
58  
59  
60



1  
2  
3 million, respectively, allowed examination of the consistency of results and trends across the  
4 populations.  
5

6  
7 The Western Australia hospital morbidity data records the principal diagnosis and up to 20  
8 additional diagnosis fields, whereas, the Scottish morbidity data includes the principal diagnosis and  
9 5 additional diagnosis fields. Consequent to the reduced number of additional diagnosis fields in the  
10 Scottish data, there was an absence of recorded supplementary total body surface area burned  
11 (TBSA%) data (ICD9 946; ICD10 T31) and greater use of ICD codes for burns to multiple regions of the  
12 body (ICD9 946; ICD10 T29) rather individual anatomic burn sites, reflected in Table 1 This limited  
13 both SIR analyses restricted to more severe burns of TBSA 20% or greater and incident rate ratio  
14 analysis to examine the effects of severity of burn injury (burn depth and TBSA%). Previous SIR  
15 analyses of total (all-sites) cancer risk in Western Australia showed similar trends in results for all  
16 burn patients (severe and non-severe).<sup>11</sup>  
17  
18  
19  
20  
21  
22

23 Although this study had a follow-up period of up to 26 years from the date of separation for  
24 admission for burn injury, the follow up period for many patients may not have provided sufficient  
25 observation time to enable identification of all potential malignancies, given the long latency period  
26 for many cancers. Further burn injury research is planned with comparison cohorts (non-burn  
27 trauma, no injury), using incidence rate ratio analyses to explore patient (including lifestyle factors  
28 such as smoking and alcohol) and injury factors associated with the observed cancer risk.  
29  
30  
31  
32

#### 33 **4.2 Findings**

34  
35 Analysis of ISD Scotland data confirmed the results of our previous study: a statistically significant  
36 increase in total (all-sites) cancer risk for female burn survivors with males experiencing no  
37 difference. The site specific analyses clearly showed statistically significant increases in the number  
38 of observed cancers for combined gender in both the Western Australia and Scottish data for the  
39 buccal cavity, larynx, liver, respiratory tract and oesophagus. There was also a general trend for  
40 increased cancer risk for a number of the selected types of cancers for females and statistically  
41 significant increases in female genital cancers. Sub group analyses, defined crudely by reproductive  
42 age, did not elucidate any clear patterns of the influence of oestrogen on cancer incidence, with  
43 female burn survivors in Scotland showing increased risk across all age groups. For female burn  
44 survivors in WA, an increased risk for total (all-sites) cancer was found for those younger than 15  
45 years (pre-pubescent) and 50 years and older (post-menopausal). The lack of gender difference for  
46 the sub-cohort of burn patients in Scotland 1983-88 for total (all-sites) cancer risk is difficult to  
47 explain. Possible reasons may include that females: sustained less severe (<20% TBSA) burns during  
48  
49  
50  
51  
52  
53  
54  
55  
56  
57  
58  
59  
60

1  
2  
3 this period; had less comorbidities; and / or had better lifestyle factors than females hospitalised for  
4 burns during the remainder of the study period.

5  
6 The site-specific analyses showed that whilst statistically significant increases in female genital  
7 cancers were found, there was also a general trend amongst female burn patients for excesses  
8 across a number of site-specific cancers examined, although these excesses did not always reach  
9 statistical significance, possibly due to small numbers. Statistically significant increases in the  
10 number of observed cancers for combined gender were found in both the Western Australia and  
11 Scottish data for the buccal cavity, larynx, liver, respiratory tract and oesophagus. These results are  
12 similar to those found in a Danish study<sup>13</sup> and may be related to tobacco or alcohol use amongst this  
13 patient population. However, it would be expected that inhalation injury may also increase the  
14 cancer risk of the upper and lower respiratory tract, and in the case of the diagnosis of  
15 hepatocellular cancer in a young male (12 years of age) burn patient in Western Australia,<sup>10</sup> tobacco  
16 or alcohol use would be most unlikely attributable agents. Interestingly, the results of no increase in  
17 skin melanoma risk after burn injury in this study support findings of other population-based  
18 studies.<sup>12 13</sup>

19  
20 An alternative explanation for this increased incidence in cancer post-burn may lie in the significant  
21 impact a burn injury has on the immune system, or the sustained oxidative and metabolic stress that  
22 are integral to the injury response. While burn injury predominantly affects the skin, it has been  
23 shown to cause significant depression of both humoral and cell-mediated immunity (CMI),<sup>7 26 27</sup>  
24 sustained elevated levels of oxidative stress<sup>28 29</sup> and prolonged elevation of hyper-metabolic and  
25 stress hormone levels.<sup>30 31</sup> These effects have been demonstrated to persist for up to 3 years post-  
26 injury and can lead to long-term systemic impacts on other organs of the body.<sup>1 2 32-36</sup> Severe burn  
27 injury has been demonstrated to induce endoplasmic reticulum (ER) stress, in particular, in the  
28 liver.<sup>37</sup> ER stress is a stress-response that initially facilitates cell survival but can switch to a pro-  
29 apoptotic signal with prolonged stress.<sup>37 38</sup> However, it has also been shown that the ER stress  
30 response can become maladaptive, facilitating adaptation to hypoxic environments and promoting  
31 tumour growth.<sup>38 39</sup> It is plausible that the array of host responses combined with the impact of the  
32 injury, therefore, creates an environment of increased susceptibility to cancer.

33  
34 In addition to the observed increase in some of the selected site-specific cancers, the data support  
35 evidence for a gender dimorphism (a systematic difference between individuals of different sex in  
36 the same species) in the response to burn injury. After burn injury, gender has been shown to be an  
37 important factor with respect to poorer outcomes for mortality<sup>40-43</sup> and improved prognosis for  
38 multiple organ dysfunction syndrome,<sup>44</sup> and sepsis,<sup>45</sup> for females compared to males. Similar gender-  
39 based differences have also been reported in animal studies of burn injury.<sup>46-50</sup>

1  
2  
3 The impact of gender with respect to outcomes after burn injury is largely thought to stem from  
4 well-established differences in immune biology. There is a substantial volume of published literature  
5 to support a gender dimorphism in the immune response<sup>51-54</sup> and sepsis<sup>45</sup> following injury that have  
6 impacts on health and mortality.<sup>41 42</sup> The majority of these studies support a more efficient and  
7 effective innate and adaptive immune responses in females, leading to more rapid clearance of  
8 infectious organisms driven by tissue resident cell populations.<sup>55</sup> This 'advantageous' response  
9 reduces the risk of infection in females compared to males<sup>55 56</sup> but leads to elevated risk of  
10 autoimmune disease.<sup>57</sup> This dimorphism was thought to arise largely due to the impact of oestrogen  
11 on immune function.<sup>58 59</sup> However, recent papers have demonstrated these differences are not  
12 completely ablated by ovariectomy (in animal models)<sup>55</sup> and others have shown that oestrogen can  
13 be deleterious to the immune response.<sup>60</sup> This suggests a role of other mediators, most likely  
14 expressed on the X-chromosome, in the maintenance of the differential immune response.<sup>61 62</sup> The  
15 evidence for gender differences in the immune response, both to thermal and other trauma, and its  
16 impact on outcomes is substantial. Here, the evidence of increased cancer incidence in selected  
17 types of cancer after burn injury, with a greater effect in females, suggests the systemic immune  
18 response to burn injury may be a mediator of cancer susceptibility.

## 29 **5. Conclusion**

30  
31 Using population-based linked data of all burn patients in both Western Australia and Scotland,  
32 consistent trends were found in excesses in cancer notifications for a range of selected site specific  
33 cancers with an elevated and more widespread increase in female burn patients. Overall, however,  
34 the increased cancer risk affected small proportions of the respective burn patient cohorts. More  
35 research is required to understand the underlying mechanism(s) that may link burn injury to an  
36 increased risk of some cancers and why this is elevated in females, which may in turn enable  
37 identification of possible sites for intervention.  
38  
39  
40  
41  
42  
43  
44  
45  
46  
47  
48  
49  
50  
51  
52  
53  
54  
55  
56  
57  
58  
59  
60

### Acknowledgements

The authors thank the staff of both the Health Information Linkage Branch for access to the Western Australian Data Linkage System and Scottish Record Linkage team for their assistance in obtaining the data and providing advice on aspects of coding. Furthermore, the authors would like to thank the WA Health Data Custodians for access to the core health datasets and both the Western Australian Department of Health and ISD Scotland for their assistance and advice. Project data costs were supported by an Australian National Health and Medical Research Council research grant and a Raine Medical Research Foundation Priming grant. J.M.D Senior Research Fellowship is supported by Woodside corporate sponsorship via the Fiona Wood Foundation.

For peer review only

**Table 1** Characteristics of burn injury patients included in analyses with no record of cancer prior to separation date of index burn admission, 1983-2008, by country.

| Characteristics                       | Western Australia<br>N (%) | Scotland<br>N (%) |
|---------------------------------------|----------------------------|-------------------|
| <b>Total number burn admissions*</b>  | 22,705                     | 37,506            |
| <b>Gender: Male</b>                   | 15,481 (68.2)              | 23,896 (63.7)     |
| <b>Age at index admission (Years)</b> |                            |                   |
| <15                                   | 8,135 (35.8)               | 14,579 (38.9)     |
| 15-24                                 | 4,364 (19.2)               | 4,495 (12.0)      |
| 25-49                                 | 7,147 (31.5)               | 9,554 (25.5)      |
| 50-64                                 | 1,736 (7.7)                | 4,080 (10.9)      |
| 65+                                   | 1,323 (5.8)                | 4,798 (12.8)      |
| <b>Site of burn**</b>                 |                            |                   |
| Head and neck                         | 6,784 (15.4)               | 7,592 (16.1)      |
| Trunk                                 | 7,553 (17.2)               | 8,815 (21.0)      |
| Hand, wrist, upper limb               | 15,801 (35.9)              | 6,984 (14.8)      |
| Hip, lower limb                       | 11,798 (26.8)              | 9,531 (3.4)       |
| Eye                                   | 379 (0.9)                  | 1,087 (2.3)       |
| Respiratory tract                     | 212 (0.5)                  | 163 (0.3)         |
| Other internal organs                 | 124 (0.3)                  | 165 (0.3)         |
| Multiple regions                      | 656 (1.5)                  | 3,677 (7.8)       |
| Unspecified region                    | 694 (1.6)                  | 858 (1.8)         |
| <b>Burn site depth**</b>              |                            |                   |
| Erythema                              | 8,929 (20.9)               | 4,815 (11.5)      |
| Partial thickness                     | 18,449 (41.9)              | 6,302 (15.0)      |
| Full thickness                        | 7,095 (16.1)               | 4,924 (11.7)      |
| Unspecified                           | 9,528 (21.7)               | 25,869 (61.7)     |
| <b>Calendar period of admission</b>   |                            |                   |
| 1983-1988                             | 5,431 (23.9)               | 11,507 (30.7)     |
| 1989-1993                             | 4,200 (18.5)               | 7,876 (21.0)      |
| 1994-1998                             | 4,755 (20.9)               | 7,130 (19.0)      |
| 1999-2003                             | 4,265 (18.9)               | 5,980 (15.9)      |
| 2004-2008                             | 4,054 (17.9)               | 5,013 (13.4)      |
| <b>Any co-morbidity at index burn</b> |                            |                   |
| <b>Yes</b>                            | 2,798 (12.3)               | 7,679 (20.5)      |

\* No previous record of cancer

\*\* Patients may have multiple burn sites per anatomical region per depth

**Table 2** Standardised incidence ratios and 95% confidence intervals and observed and expected numbers for total (all-sites) cancer in persons hospitalised for burn injury in Western Australia and Scotland, during the periods 1983-2008 and 1983-1988.

|                                   | Western Australia††             |                                |                                | Scotland                            |                                    |                                 |
|-----------------------------------|---------------------------------|--------------------------------|--------------------------------|-------------------------------------|------------------------------------|---------------------------------|
|                                   | Combined<br>SIR 95%CI*<br>O:E** | Male†<br>SIR 95%CI<br>O:E      | Female†<br>SIR 95%CI<br>O:E    | Combined<br>SIR 95%CI<br>O:E        | Male†<br>SIR 95%CI<br>O:E          | Female†<br>SIR 95%CI<br>O:E     |
| <b>Total cohort<br/>1983-2008</b> | 0.97 (0.9 to 1.0)<br>759: 785.5 | 0.9 (0.8 to 1.0)<br>515: 569.5 | 1.1 (1.0 to 1.3)<br>244: 216.0 | 1.09 (1.05 to 1.10)<br>2260: 2075.9 | 0.96 (0.90 to 1.0)<br>1249: 1303.2 | 1.3 (1.2 to 1.4)<br>1011: 772.6 |
| <b>Sub-cohort<br/>1983-1988</b>   | 1.0 (0.9 to 1.1)<br>294:294.9   | 0.9 (0.8 to 1.0)<br>190:220.3  | 1.4 (1.1 to 1.7)<br>104: 74.6  | 0.9 (0.8 to 0.9)<br>838: 953.4      | 0.8 (0.7 to 0.9)<br>491: 614.3     | 1.0 (0.9 to 1.2)<br>347: 339.1  |

\*SIR (95%CI): Standardised Incidence Ratio (95% confidence interval) adjusted for age and gender

\*\* O: E: Observed: Expected

†SIR (95%CI): Standardised Incidence Ratio (95% confidence interval) adjusted for age

†† Western Australian comparison data Duke et al. Burns 2011; 38:340-47.

**Table 3** Standardised incidence ratios and 95% confidence intervals and observed and expected numbers for selected types of cancer in persons hospitalised for burns Western Australia and Scotland, 1983-2008.

| Cancer Site<br>ICD-10‡                           | Western Australia               |                                |                              | Scotland                       |                                |                                |
|--------------------------------------------------|---------------------------------|--------------------------------|------------------------------|--------------------------------|--------------------------------|--------------------------------|
|                                                  | Combined<br>SIR 95%CI*<br>O:E** | Male<br>SIR 95%CI†<br>O:E      | Female<br>SIR 95%CI†<br>O:E  | Combined<br>SIR 95%CI*<br>O:E  | Male<br>SIR 95%CI†<br>O:E      | Female<br>SIR 95%CI†<br>O:E    |
| Buccal cavity<br>C00 to C14                      | 1.4 (1.03 to 1.9)<br>45: 32.6   | 1.4 (1.0 to 1.9)               | 1.5 (0.7 to 3.2)<br>7: 4.6   | 2.6 (2.2 to 3.1)<br>117: 45.0  | 2.4 (1.9 to 2.9)<br>83: 35.1   | 3.4 (2.5 to 4.8)<br>34:9.9     |
| Oesophagus<br>C15                                | 1.4 (0.9 to 2.4)<br>15:10.50    | 1.5 (0.9 to 2.6)<br>13: 8.7    | 1.1 (0.3 to 4.5)<br>2: 1.8   | 1.6 (1.3 to 2.0)<br>82: 51.4   | 1.5 (1.1 to 1.9)<br>53:36.1    | 1.9 (1.3 to 2.7)<br>29:15.3    |
| Stomach<br>C16                                   | 0.6 (0.3 to 1.1)<br>10:17.0     | 0.5 (0.2 to 1.1)<br>7: 13.4    | 0.8 (0.3 to 2.6)<br>3: 3.6   | 1.2 (0.9 to 1.5)<br>73:63.2    | 1.1 (0.8 to 1.5)<br>1.2 5: 2.8 | 1.3 (0.9 to 1.9)<br>25:19.5    |
| Colorectal<br>C18 to C20                         | 0.7 (0.6 to 0.9)<br>69: 96.3    | 0.7 (0.5 to 0.9)<br>45: 69.1   | 0.9 (0.6 to 1.3)<br>24: 27.2 | 1.2 (1.1 to 1.4)<br>268:221.8  | 1.0 (0.9 to 1.2)<br>142:140.5  | 1.4 (1.3 to 1.8)<br>125: 81.3  |
| Liver<br>C22                                     | 2.6 (1.6 to 4.0)<br>19: 7.4     | 2.2 (1.3 to 3.7)<br>14: 6.3    | 4.7 (2.0 to 11.4)<br>5: 1.1  | 1.7 (1.2 to 2.5)<br>31:18.0    | 1.5 (1.1 to 2.5)<br>22: 13.3   | 1.9 (1.0 to 3.7)<br>9: 4.7     |
| Pancreas<br>C25                                  | 0.7 (0.4 to 1.3)<br>11: 15.3    | 0.9 (0.5 to 1.7)<br>9: 10.4    | 0.4 (0.1 to 1.6)<br>2: 5.0   | 1.1 (0.8 to 1.5)<br>44:39.6    | 1.5 (1.03 to 2.0)<br>34: 23.4  | 0.6 (0.3 to 1.2)<br>10: 16.2   |
| Larynx<br>C32                                    | 5.7 (0.9 to 3.3)<br>10: 5.7     | 1.5 (0.7 to 3.0)<br>8: 5.4     | 6.0 (1.5 to 24.1)<br>2: 0.3  | 1.9 (1.4 to 2.5)<br>39: 21.1   | 1.5 (1.1 to 2.2)<br>28: 18.5   | 4.2(2.3 to 7.7)<br>11:2.6      |
| Respiratory tract<br>C33 to C34                  | 1.4 (1.1 to 1.6)<br>101: 74.8   | 1.3 (1.1 to 1.7)<br>79:59.3    | 1.4 (0.9 to 2.2)<br>22:15.4  | 1.5 (1.4 to 1.7)<br>448:298.1  | 1.3 (1.2 to 1.5)<br>279:210.4  | 1.9 (1.7 to 2.2)<br>169:87.7   |
| Skin – malignant<br>melanoma<br>C43              | 0.7 (0.6 to 0.9)<br>72: 102.0   | 0.7 (0.6 to 1.0)<br>57: 77.9   | 0.6 (0.4 to 1.0)<br>15: 24.1 | 0.8 (0.6 to 1.1)<br>38:48.5    | 0.7 (0.4 to 1.1)<br>19:28.4    | 1.0 (0.4 to 1.1)<br>19:20.0    |
| Breast<br>C50                                    | 1.0 (0.8 to 1.3)<br>65: 62.4    | 1.3 (0.2 to 9.2)<br>1: 0.8     | 1.0 (0.8 to 1.3)<br>64:61.7  | 1.7 (1.5 to 1.9)<br>271:161.4  | 0.7 (0.1 to 4.8)<br>1:1.5      | 1.6 (1.5 to 1.9)<br>270: 160.0 |
| Female genital<br>tract (combined)<br>C51 to C57 |                                 |                                | 1.4 (1.0 to 2.0)<br>31:26.7  |                                |                                | 1.7 (1.4 to 2.0)<br>114: 67.2  |
| Male genital<br>tract (combined)<br>C60 to C63   |                                 | 0.9 (0.8 to 1.1)<br>141: 150.7 |                              |                                | 1.1 (1.0 to 1.3)<br>210: 192.6 |                                |
| Prostate<br>C61                                  |                                 | 0.8 (0.6 to 0.9)<br>102: 135.9 |                              |                                | 1.1 (0.9 to 1.2)<br>177: 165.5 |                                |
| Kidney, Bladder,<br>UT C64 to C68                | 0.5 (0.3 to 0.7)<br>17: 37.9    | 0.4 (0.2 to 0.7)<br>12: 30.9   | 0.7 (0.3 to 1.7)<br>5: 7.0   | 1.2 (1.0 to 1.4)<br>135: 110.9 | 1.2 (1.0 to 1.4)<br>96: 82.8   | 1.4 (1.0 to 1.9)<br>39: 28.0   |
| Brain<br>C71                                     | 1.2 (0.7 to 1.9)<br>16: 13.9    | 1.0 (0.5 to 1.8)<br>10: 10.5   | 1.7 (0.8 to 3.9)<br>6: 3.5   | 1.5 (1.1 to 2.0)<br>39:27.0    | 1.4 (0.9 to 2.0)<br>26:19.2    | 1.7 (1.0 to 2.9)<br>13:7.8     |
| Lymphomas to<br>all                              | 1.0 (0.7 to 1.4)<br>36: 35.5    | 0.8 (0.5 to 1.2)<br>20: 26.0   | 1.7 (1.03 to 2.7)<br>16:9.6  | 1.1 (0.9 to 1.4)<br>75:68.0    | 1.1 (0.8 to 1.4)<br>48:45.0    | 1.2 (0.8 to 1.7)<br>27:23.0    |
| Myeloma/<br>plasma                               | 1.3 (0.7 to 2.3)<br>11: 8.6     | 1.3 (0.7 to 2.6)<br>8:6.1      | 1.2 (0.4 to 3.7)<br>3: 2.49  | 1.1 (0.7 to 1.6)<br>22:21.0    | 1.0 (0.6 to 1.7)<br>13:13.2    | 1.2 (0.6 to 2.2)<br>9: 7.8     |
| Leukaemia's to<br>all                            | 1.1 (0.8 to 1.7)<br>26: 22.9    | 1.1 (0.7 to 1.8)<br>19: 17.0   | 1.2 (0.6 to 2.5)<br>7: 6.0   | 1.3 (1.01 to 1.7)<br>63:48.6   | 1.0 (0.73 to 1.4)<br>34:33.1   | 1.8 (1.3 to 2.7)<br>29: 15.5   |

\*SIR (95%CI): Standardised Incidence Ratio adjusted for age and gender (95% confidence interval)

\*\* O: E: Observed: Expected

†SIR (95%CI): Standardised Incidence Ratio adjusted for age (95% confidence interval)

‡ ICD-10: International Classification of Disease s (ICD) version 10

**Table 4** Standardised incidence ratios and 95% confidence intervals and observed and expected numbers for total (all-sites) cancer incidence, for persons hospitalised for burns Western Australia and Scotland, by age group, 1983 to 1988.

| Age at first burn years | SIR (95%CI)<br>(observed: expected)  |                                      |                                      |
|-------------------------|--------------------------------------|--------------------------------------|--------------------------------------|
|                         | combined gender*                     | Male†                                | Female†                              |
| <b>&lt;15</b>           |                                      |                                      |                                      |
| <b>WA</b>               | 1.17 (0.82 to 1.68)<br>(30:25)       | 1.19 (0.77 to 1.84)<br>(20:16)       | 1.15 (0.62 to 2.14)<br>(10:8.6)      |
| <b>Scotland</b>         | 0.94 (0.69 to 1.28)<br>(41:43.69)    | 0.72 (0.47 to 1.12)<br>(20:27.77)    | 1.32 (0.86 to 2.02)<br>(21:15.92)    |
| <b>15 to 49</b>         |                                      |                                      |                                      |
| <b>WA</b>               | 0.87 (0.77 to 0.99)<br>(273: 313)    | 0.87 (0.75 to 1.00)<br>(197: 226)    | 0.86 (0.69 to 1.1)<br>(76: 87)       |
| <b>Scotland</b>         | 1.21 (1.12 to 1.31)<br>(617: 509.16) | 1.04 (0.94 to 1.16)<br>(345: 331.68) | 1.53 (1.36 to 1.73)<br>(272: 177.48) |
| <b>≥ 50</b>             |                                      |                                      |                                      |
| <b>WA</b>               | 1.02 (0.93 to 1.12)<br>(456: 446)    | 0.91 (0.82 to 1.02)<br>(298: 326)    | 1.32 (1.13 to 1.54)<br>(158: 120)    |
| <b>Scotland</b>         | 1.05 (1.00 to 1.11)<br>(1602: 1523)  | 0.94 (0.88 to 1.00)<br>(884: 943.75) | 1.23 (1.15 to 1.33)<br>(718:579.25)  |

\*SIR (95%CI): Standardised Incidence Ratio adjusted for age and gender (95% confidence interval)

†SIR (95%CI): Standardised Incidence Ratio adjusted for age (95% confidence interval)



## References

1. Anderson JR, Zorbas JS, Phillips JK, Harrison JL, Dawson LF, Bolt SE, et al. Systemic decreases in cutaneous innervation after burn injury. *Journal of Investigative Dermatology* 2010;130(7):1948-51.
2. Jeschke MG, Gauglitz GG, Kulp GA, Finnerty CC, Williams FN, Kraft R, et al. Long-term persistence of the pathophysiologic response to severe burn injury. *PLoS ONE [Electronic Resource]* 2011;6(7):e21245.
3. Rea S, Giles NL, Webb S, Adcroft KF, Evill LM, Strickland DH, et al. Bone marrow-derived cells in the healing burn wound--more than just inflammation. *Burns* 2009;35(3):356-64.
4. Deveci M, Sengezer M, Bozkurt M, Eski M, Inal A. Comparison of lymphocyte populations in cutaneous and electrical burn patients: a clinical study. *Burns* 2000;26(3):229-32.
5. Heideman M, Bengtsson A. The immunologic response to thermal injury. *World Journal of Surgery* 1992;16(1):53-6.
6. McGill SN, Cartotto RC. Herpes simplex virus infection in a paediatric burn patient: case report and review. *Burns* 2000;26(2):194-9.
7. O'Sullivan ST, O'Connor TP. Immunosuppression following thermal injury: the pathogenesis of immunodysfunction. *British Journal of Plastic Surgery* 1997;50(8):615-23.
8. Sjoberg T, Mzezewa S, Jonsson K, Salemark L. Immune response in burn patients in relation to HIV infection and sepsis. *Burns* 2004;30(7):670-4.
9. Jeschke MG, Barrow RE, Herndon DN. Extended hypermetabolic response of the liver in severely burned pediatric patients. *Archives of Surgery* 2004;139(6):641-7.
10. Harper A, Rea S, Wood F. Hepatocellular carcinoma in a young survivor of major burns. *Burns* 2008;34(4):572-4.
11. Duke J, Rea S, Semmens J, Edgar D, Wood F. Burn Injury and cancer risk: A state-wide longitudinal study. *Burns* 2011;38:340-47.
12. Lindelof B, Krynitz B, Granath F, Ekblom A. Burn injuries and skin cancer: a population-based cohort study. *Acta Dermato-Venereologica* 2008;88(1):20-2.
13. Mellemkjaer L, Holmich LR, Gridley G, Rabkin C, Olsen JH. Risks for skin and other cancers up to 25 years after burn injuries. *Epidemiology* 2006;17(6):668-73.
14. Holman CDJ, Bass AJ, Rouse IL, Hobbs MST. Population-based linkage of health records in Western Australia: development of a health service research linked database. *Australian and New Zealand Journal of Public Health* 1999;23(5):453-59.
15. Kendrick S, Clarke J. The Scottish Record Linkage System. *Health Bulletin* 1993;51(2):72-9.
16. Duke J, Wood F, Semmens J, Spilsbury K, Edgar DW, Hendrie D, et al. A 26-year population-based study of burn injury hospital admissions in Western Australia. *Journal of Burn Care & Research* 2011;32(3):379-86.
17. Threlfall T, Thompson JR. Cancer incidence and mortality in Western Australia, 2008. Statistical Series Number 87. Perth: Department of Health, Western Australia, 2010.
18. ISD Scotland. ISD Scotland, better information, better decisions, better health, 2010.
19. Brewster DH, Stockton D, Harvey J, Mackay M. Reliability of cancer registration data in Scotland, 1997. *European Journal of Cancer* 2002;38(3):414-7.
20. Brewster DH, Stockton DL. Ascertainment of breast cancer by the Scottish Cancer Registry: an assessment based on comparison with five independent breast cancer trials databases. *Breast* 2008;17(1):104-6.
21. Gordis L. *Epidemiology* Second ed. Philadelphia: W.B. Saunders Company, 2000.
22. Verkasalo PK, Pukkala E, Kaprio J, Heikkila KV, Koskenvuo M. Magnetic fields of high voltage power lines and risk of cancer in Finnish adults: nationwide cohort study. *BMJ* 1996;313(7064):1047-51.
23. Bailar III J, Ederer F. Significance Factors for the Ratio of a Poisson Variable to Its Expectation. *Biometrics* 1964;20:639-43.

- 1
- 2
- 3 24. ISD Scotland. Assessment of SMR01 Data 2010-2011 Scotland Report May 2012. Edinburgh: NHS
- 4 National Services Scotland, 2012.
- 5 25. Department of Health Western Australia. Clinical Information Audit Program - Hospital Activity
- 6 Report. *Operational Directive OD 0201/09*. Perth Department of Health WA, 2009.
- 7 26. Horgan PG, Mannick JA, Dubravec DB, Rodrick ML. Effect of low dose recombinant interleukin 2
- 8 plus indomethacin on mortality after sepsis in a murine burn model. *British Journal of*
- 9 *Surgery* 1990;77(4):401-4.
- 10 27. Schmand JF, Ayala A, Chaudry IH. Effects of trauma, duration of hypotension, and resuscitation
- 11 regimen on cellular immunity after hemorrhagic shock. *Critical Care Medicine*
- 12 1994;22(7):1076-83.
- 13 28. Liu D-m, Sun B-w, Sun Z-w, Jin Q, Sun Y, Chen X. Suppression of inflammatory cytokine
- 14 production and oxidative stress by CO-releasing molecules-liberated CO in the small
- 15 intestine of thermally-injured mice. *Zhongguo Yao Li Xue Bao/Acta Pharmacologica Sinica*
- 16 2008;29(7):838-46.
- 17 29. Shupp JW, Nasabzadeh TJ, Rosenthal DS, Jordan MH, Fidler P, Jeng JC. A review of the local
- 18 pathophysiologic bases of burn wound progression. *Journal of Burn Care & Research*
- 19 2010;31(6):849-73.
- 20 30. Atiyeh BS, Gunn SWA, Dibo SA. Metabolic implications of severe burn injuries and their
- 21 management: a systematic review of the literature. *World Journal of Surgery*
- 22 2008;32(8):1857-69.
- 23 31. Williams FN, Herndon DN, Jeschke MG. The hypermetabolic response to burn injury and
- 24 interventions to modify this response. *Clinics in Plastic Surgery* 2009;36(4):583-96.
- 25 32. Ananthakrishnan P, Cohen DB, Xu DZ, Lu Q, Feketeova E, Deitch EA. Sex hormones modulate
- 26 distant organ injury in both a trauma/hemorrhagic shock model and a burn model. *Surgery*
- 27 2005;137(1):56-65.
- 28 33. Dreschsler S, Weixelbaumer K, Raeven P, Jafarmadar M, Khadam A, van Griensven M, et al.
- 29 Relationship between Age/Gender-Induced Survival Changes and the Magnitude of
- 30 Inflammatory Activation and Organ Dysfunction in Post-Traumatic Sepsis. *PLoS ONE*
- 31 *[Electronic Resource]* 2012;7(12):e5147.
- 32 34. Borue X, Lee S, Grove J, Herzog EL, Harris R, Diflo T, et al. Bone marrow-derived cells contribute
- 33 to epithelial engraftment during wound healing. *American Journal of Pathology*
- 34 2004;165(5):1767-72.
- 35 35. Fan Q, Yee CL, Ohyama M, Tock C, Zhang G, Darling TN, et al. Bone marrow-derived keratinocytes
- 36 are not detected in normal skin and only rarely detected in wounded skin in two different
- 37 murine models. *Experimental Hematology* 2006;34(5):672-9.
- 38 36. Harris RG, Herzog EL, Bruscia EM, Grove JE, Van Arnam JS, Krause DS. Lack of a fusion
- 39 requirement for development of bone marrow-derived epithelia. *Science*
- 40 2004;305(5680):90-3.
- 41 37. Jeschke MG, Finnerty CC, Herndon DN, Song J, Boehning D, Tompkins RG, et al. Severe injury is
- 42 associated with insulin resistance, endoplasmic reticulum stress response, and unfolded
- 43 protein response. *Annals of Surgery* 2012;255(2):370-8.
- 44 38. Verfaillie T, Garg AD, Agostinis P. Targeting ER stress induced apoptosis and inflammation in
- 45 cancer. *Cancer Letters* 2013;332(2):249-64.
- 46 39. Wang S, Kaufman RJ. The impact of the unfolded protein response on human disease. *Journal of*
- 47 *Cell Biology* 2012;197(7):857-67.
- 48 40. George RL, McGwin G, Jr., Schwacha MG, Metzger J, Cross JM, Chaudry IH, et al. The association
- 49 between sex and mortality among burn patients as modified by age. *Journal of Burn Care &*
- 50 *Rehabilitation* 2005;26(5):416-21.
- 51 41. Kerby JD, McGwin G, Jr., George RL, Cross JA, Chaudry IH, Rue LW, 3rd, et al. Sex differences in
- 52 mortality after burn injury: results of analysis of the National Burn Repository of the
- 53 American Burn Association. *Journal of Burn Care & Research* 2006;27(4):452-6.
- 54
- 55
- 56
- 57
- 58
- 59
- 60

- 1
- 2
- 3 42. McGwin G, Jr., George RL, Cross JM, Reiff DA, Chaudry IH, Rue LW, 3rd. Gender differences in
- 4 mortality following burn injury. *Shock* 2002;18(4):311-5.
- 5 43. O'Keefe GE, Hunt JL, Purdue GF. An evaluation of risk factors for mortality after burn trauma and
- 6 the identification of gender-dependent differences in outcomes. *Journal of the American*
- 7 *College of Surgeons* 2001;192(2):153-60.
- 8 44. Frink M, Pape H-C, van Griensven M, Krettek C, Chaudry IH, Hildebrand F. Influence of sex and
- 9 age on mods and cytokines after multiple injuries. *Shock* 2007;27(2):151-6.
- 10 45. Schroder J, Kahlke V, Book M, Stuber F. Gender differences in sepsis: genetically determined?
- 11 *Shock* 2000;14(3):307-10; discussion 10-3.
- 12 46. Gregory MS, Duffner LA, Faunce DE, Kovacs EJ. Estrogen mediates the sex difference in post-burn
- 13 immunosuppression. *Journal of Endocrinology* 2000;164(2):129-38.
- 14 47. Gregory MS, Faunce DE, Duffner LA, Kovacs EJ. Gender difference in cell-mediated immunity
- 15 after thermal injury is mediated, in part, by elevated levels of interleukin-6. *Journal of*
- 16 *Leukocyte Biology* 2000;67(3):319-26.
- 17 48. Kahlke V, Angele MK, Ayala A, Schwacha MG, Cioffi WG, Bland KI, et al. Immune dysfunction
- 18 following trauma-haemorrhage: influence of gender and age. *Cytokine* 2000;12(1):69-77.
- 19 49. Kahlke V, Angele MK, Schwacha MG, Ayala A, Cioffi WG, Bland KI, et al. Reversal of sexual
- 20 dimorphism in splenic T lymphocyte responses after trauma-hemorrhage with aging.
- 21 *American Journal of Physiology - Cell Physiology* 2000;278(3):C509-16.
- 22 50. Plackett TP, Gamelli RL, Kovacs EJ. Gender-based differences in cytokine production after burn
- 23 injury: a role of interleukin-6. *Journal of the American College of Surgeons* 2010;210(1):73-8.
- 24 51. Croce MA, Fabian TC, Malhotra AK, Bee TK, Miller PR. Does gender difference influence
- 25 outcome? *Journal of Trauma-Injury Infection & Critical Care* 2002;53(5):889-94.
- 26 52. Horton JW, White DJ, Maass DL. Gender-related differences in myocardial inflammatory and
- 27 contractile responses to major burn trauma. *American Journal of Physiology - Heart &*
- 28 *Circulatory Physiology* 2004;286(1):H202-13.
- 29 53. Mace JE, Park MS, Mora AG, Chung KK, Martini W, White CE, et al. Differential expression of the
- 30 immunoinflammatory response in trauma patients: burn vs. non-burn. *Burns*
- 31 2012;38(4):599-606.
- 32 54. Verthelyi D. Sex hormones as immunomodulators in health and disease. *International*
- 33 *Immunopharmacology* 2001;1(6):983-93.
- 34 55. Scotland RS, Stables MJ, Madalli S, Watson P, Gilroy DW. Sex differences in resident immune cell
- 35 phenotype underlie more efficient acute inflammatory responses in female mice. *Blood*
- 36 2011;118(22):5918-27.
- 37 56. Sperry JL, Nathens AB, Frankel HL, Vanek SL, Moore EE, Maier RV, et al. Characterization of the
- 38 gender dimorphism after injury and hemorrhagic shock: are hormonal differences
- 39 responsible? *Critical Care Medicine* 2008;36(6):1838-45.
- 40 57. Ozelik T. X chromosome inactivation and female predisposition to autoimmunity. *Clinical*
- 41 *Reviews in Allergy & Immunology* 2008;34(3):348-51.
- 42 58. Nicol T, Vernon-Roberts B, Quantock DC. Effect of orchidectomy and ovariectomy on survival
- 43 against lethal infections in mice. *Nature* 1966;211(5053):1091-2.
- 44 59. Paavonen T. Hormonal regulation of immune responses. *Annals of Medicine* 1994;26(4):255-8.
- 45 60. Rettew JA, Huet YM, Marriott I. Estrogens augment cell surface TLR4 expression on murine
- 46 macrophages and regulate sepsis susceptibility in vivo. *Endocrinology* 2009;150(8):3877-84.
- 47 61. Libert C, Dejager L, Pinheiro I. The X chromosome in immune functions: when a chromosome
- 48 makes the difference. *Nature Reviews. Immunology* 2010;10(8):594-604.
- 49 62. Pinheiro I, Dejager L, Libert C. X-chromosome-located microRNAs in immunity: might they
- 50 explain male/female differences? The X chromosome-genomic context may affect X-located
- 51 miRNAs and downstream signaling, thereby contributing to the enhanced immune response
- 52 of females. *Bioessays* 2011;33(11):791-802.
- 53
- 54
- 55
- 56
- 57
- 58
- 59
- 60

STROBE Statement—checklist of items that should be included in reports of observational studies

*Page numbers in this checklist – relate to page numbers of the final pdf version of uploaded manuscript file*

|                           | Item No | Recommendation                                                                                                                                                                                                                                                                                                                                                                                                                                                                                                                                                                                                                                                                                                                                                                                                                   |
|---------------------------|---------|----------------------------------------------------------------------------------------------------------------------------------------------------------------------------------------------------------------------------------------------------------------------------------------------------------------------------------------------------------------------------------------------------------------------------------------------------------------------------------------------------------------------------------------------------------------------------------------------------------------------------------------------------------------------------------------------------------------------------------------------------------------------------------------------------------------------------------|
| <b>Title and abstract</b> | 1       | (a) Indicate the study's design with a commonly used term in the title or the abstract<br><i>Population-based retrospective cohort record linkage study – in abstract</i><br><i>Title: Burn injury, gender and cancer risk: population-based cohort study using data from Scotland and Western Australia. (Pages 1, 5)</i><br><hr/> (b) Provide in the abstract an informative and balanced summary of what was done and what was found<br><i>Abstract - Page 5</i>                                                                                                                                                                                                                                                                                                                                                              |
| <b>Introduction</b>       |         |                                                                                                                                                                                                                                                                                                                                                                                                                                                                                                                                                                                                                                                                                                                                                                                                                                  |
| Background/rationale      | 2       | Explain the scientific background and rationale for the investigation being reported<br><i>While burns predominantly affect the skin, burns are associated with significant systemic effects, depressed immune functioning and prolonged periods of systemic catabolism and hypermetabolism, that may increase a person's risk of cancer. (Page 6)</i>                                                                                                                                                                                                                                                                                                                                                                                                                                                                           |
| Objectives                | 3       | State specific objectives, including any prespecified hypotheses<br><i>Done: Firstly, confirm the increased risk of 'all-cause' cancer observed in the preliminary Western Australian study of female burn survivors using the Scottish data; and, secondly, examine site-specific cancer risk amongst survivors of burn injury (Page 6)</i>                                                                                                                                                                                                                                                                                                                                                                                                                                                                                     |
| <b>Methods</b>            |         |                                                                                                                                                                                                                                                                                                                                                                                                                                                                                                                                                                                                                                                                                                                                                                                                                                  |
| Study design              | 4       | Present key elements of study design early in the paper<br><i>Clearly presented in Introduction and Methods sections (Pages 5- 8)</i>                                                                                                                                                                                                                                                                                                                                                                                                                                                                                                                                                                                                                                                                                            |
| Setting                   | 5       | Describe the setting, locations, and relevant dates, including periods of recruitment, exposure, follow-up, and data collection<br><i>Clearly presented in Methods section (Pages 6 - 8)</i>                                                                                                                                                                                                                                                                                                                                                                                                                                                                                                                                                                                                                                     |
| Participants              | 6       | (a) <i>Cohort study</i> —Give the eligibility criteria, and the sources and methods of selection of participants. Describe methods of follow-up<br><i>Population-based study of linked health administrative datasets: whole of population data are used. (Pages 6-8)</i><br><i>Case-control study</i> —Give the eligibility criteria, and the sources and methods of case ascertainment and control selection. Give the rationale for the choice of cases and controls<br><i>Cross-sectional study</i> —Give the eligibility criteria, and the sources and methods of selection of participants<br><hr/> (b) <i>Cohort study</i> —For matched studies, give matching criteria and number of exposed and unexposed<br><i>Case-control study</i> —For matched studies, give matching criteria and the number of controls per case |
| Variables                 | 7       | Clearly define all outcomes, exposures, predictors, potential confounders, and effect modifiers. Give diagnostic criteria, if applicable<br><i>Burn exposure (Page 7) and cancer outcomes (Page 8) clearly defined.</i>                                                                                                                                                                                                                                                                                                                                                                                                                                                                                                                                                                                                          |

|                                                                                                                                  |                              |     |                                                                                                                                                                                                                                                                                                                                                                                                                                                                                                                                                                                                                                                                                                                                                                                                                                                                                                                                                                                                                                                                                                               |
|----------------------------------------------------------------------------------------------------------------------------------|------------------------------|-----|---------------------------------------------------------------------------------------------------------------------------------------------------------------------------------------------------------------------------------------------------------------------------------------------------------------------------------------------------------------------------------------------------------------------------------------------------------------------------------------------------------------------------------------------------------------------------------------------------------------------------------------------------------------------------------------------------------------------------------------------------------------------------------------------------------------------------------------------------------------------------------------------------------------------------------------------------------------------------------------------------------------------------------------------------------------------------------------------------------------|
| 1<br>2<br>3<br>4<br>5<br>6<br>7<br>8                                                                                             | Data sources/<br>measurement | 8*  | For each variable of interest, give sources of data and details of methods of assessment (measurement). Describe comparability of assessment methods if there is more than one group<br><i>Data sources clearly defined in Methods: Information Service Division (ISD) Scotland Western Australia Data Linkage System (Page 7) and reference population-based age and gender cancer incidence rates (Page 7-8)</i>                                                                                                                                                                                                                                                                                                                                                                                                                                                                                                                                                                                                                                                                                            |
| 9<br>10<br>11<br>12                                                                                                              | Bias                         | 9   | Describe any efforts to address potential sources of bias<br><i>Population-level linked administrative data minimises issues of selection and reporting bias, and loss to follow-up.</i>                                                                                                                                                                                                                                                                                                                                                                                                                                                                                                                                                                                                                                                                                                                                                                                                                                                                                                                      |
| 13<br>14<br>15<br>16                                                                                                             | Study size                   | 10  | Explain how the study size was arrived at<br><i>Whole of population study undertaken (Scotland and Western Australia) stated in Methods (Page 6-8).</i>                                                                                                                                                                                                                                                                                                                                                                                                                                                                                                                                                                                                                                                                                                                                                                                                                                                                                                                                                       |
| 17<br>18<br>19<br>20                                                                                                             | Quantitative variables       | 11  | Explain how quantitative variables were handled in the analyses. If applicable, describe which groupings were chosen and why<br><i>Groupings described / defined in Methods (Page 8)</i>                                                                                                                                                                                                                                                                                                                                                                                                                                                                                                                                                                                                                                                                                                                                                                                                                                                                                                                      |
| 21<br>22<br>23<br>24<br>25<br>26<br>27<br>28<br>29<br>30<br>31<br>32<br>33<br>34<br>35<br>36<br>37<br>38<br>39<br>40<br>41<br>42 | Statistical methods          | 12  | (a) Describe all statistical methods, including those used to control for confounding<br><i>All analyses clearly presented in Methods for each cohort of burn patients hospitalised in both Scotland and Western Australia: 1) from 1983 to 2008; 2) subgroup 1983-1988; and 3) by grouped age at admission (&lt;15; ≥15 and &lt;50; ≥ 50 years) (Page 8)</i><br><i>Whole of population examination of observed versus expected cancer cases using Standardised Incidence Ratios, adjusting for 5-year age group and gender, and calendar period from 1983-2008.</i><br>(b) Describe any methods used to examine subgroups and interactions<br>(c) Explain how missing data were addressed<br>(d) Cohort study—If applicable, explain how loss to follow-up was addressed<br><i>Whole of population based study using linked data (Page 6-8)</i><br><i>Case-control study—If applicable, explain how matching of cases and controls was addressed</i><br><i>Cross-sectional study—If applicable, describe analytical methods taking account of sampling strategy</i><br>(e) Describe any sensitivity analyses |
| 43                                                                                                                               | <b>Results</b>               |     |                                                                                                                                                                                                                                                                                                                                                                                                                                                                                                                                                                                                                                                                                                                                                                                                                                                                                                                                                                                                                                                                                                               |
| 44<br>45<br>46<br>47<br>48<br>49<br>50                                                                                           | Participants                 | 13* | a) Report numbers of individuals at each stage of study—eg numbers potentially eligible, examined for eligibility, confirmed eligible, included in the study, completing follow-up, and analysed<br><i>Numbers of patient records included in study clearly stated in Results (Pages 8-9)</i><br>(b) Give reasons for non-participation at each stage<br>(c) Consider use of a flow diagram                                                                                                                                                                                                                                                                                                                                                                                                                                                                                                                                                                                                                                                                                                                   |
| 51<br>52<br>53<br>54<br>55<br>56<br>57<br>58<br>59<br>60                                                                         | Descriptive data             | 14* | (a) Give characteristics of study participants (eg demographic, clinical, social) and information on exposures and potential confounders<br><i>Data presented in Table 1(Page 15)</i><br>(b) Indicate number of participants with missing data for each variable of interest<br><i>N/A</i><br>(c) Cohort study—Summarise follow-up time (eg, average and total amount)<br><i>Average follow up time presented for each patient cohort in Results (Page9)</i>                                                                                                                                                                                                                                                                                                                                                                                                                                                                                                                                                                                                                                                  |



|                          |     |                                                                                                                                                                                                                                                                                                                                                                                                                                                                                                                                                                                                                                                                                                                                                                                      |
|--------------------------|-----|--------------------------------------------------------------------------------------------------------------------------------------------------------------------------------------------------------------------------------------------------------------------------------------------------------------------------------------------------------------------------------------------------------------------------------------------------------------------------------------------------------------------------------------------------------------------------------------------------------------------------------------------------------------------------------------------------------------------------------------------------------------------------------------|
| Outcome data             | 15* | <p><i>Cohort study</i>—Report numbers of outcome events or summary measures over time<br/>Presented in Results (Page 9) and Table 2 (Page 16), Table 3 (Page 17) and Table 4 (Page 18)</p> <hr/> <p><i>Case-control study</i>—Report numbers in each exposure category, or summary measures of exposure</p> <hr/> <p><i>Cross-sectional study</i>—Report numbers of outcome events or summary measures</p>                                                                                                                                                                                                                                                                                                                                                                           |
| Main results             | 16  | <p>(a) Give unadjusted estimates and, if applicable, confounder-adjusted estimates and their precision (eg, 95% confidence interval). Make clear which confounders were adjusted for and why they were included<br/><i>Standardised Incidence Ratio (SIR) and 95% Confidence Intervals clearly presented in text and Tables with appropriate labelling of variables standardised for (e.g. 5-year age groups, gender). Presented in Results (Page 9) and Table 2 (Page 16), Table 3 (Page 17) and Table 4 (Page 18)</i></p> <hr/> <p>(b) Report category boundaries when continuous variables were categorized<br/>Age boundaries clearly reported</p> <hr/> <p>(c) If relevant, consider translating estimates of relative risk into absolute risk for a meaningful time period</p> |
| Other analyses           | 17  | <p>Report other analyses done—eg analyses of subgroups and interactions, and sensitivity analyses<br/><i>All results of sub-group analyses presented. (Tables 2-4 – Pages 16-18)</i></p>                                                                                                                                                                                                                                                                                                                                                                                                                                                                                                                                                                                             |
| <b>Discussion</b>        |     |                                                                                                                                                                                                                                                                                                                                                                                                                                                                                                                                                                                                                                                                                                                                                                                      |
| Key results              | 18  | <p>Summarise key results with reference to study objectives<br/><i>Page 12</i></p>                                                                                                                                                                                                                                                                                                                                                                                                                                                                                                                                                                                                                                                                                                   |
| Limitations              | 19  | <p>Discuss limitations of the study, taking into account sources of potential bias or imprecision. Discuss both direction and magnitude of any potential bias<br/><i>Strengths and limitations of the study have been presented in the Discussion 4.2 Methodological Issues (Pages 10-11).<br/>The burn patient cohorts under study are part of the respective reference populations, and as such, this may have a diluting effect in the standardised incidence ratios. The results presented are for the total burn patient cohorts including both severe and non-severe burns; the results are therefore, conservative.</i></p>                                                                                                                                                   |
| Interpretation           | 20  | <p>Give a cautious overall interpretation of results considering objectives, limitations, multiplicity of analyses, results from similar studies, and other relevant evidence.<br/><i>The results are conservative and results have been interpreted in light of current literature on the impacts of burn injury on the immune system and other systemic effects. (Pages 10 – 13)</i></p>                                                                                                                                                                                                                                                                                                                                                                                           |
| Generalisability         | 21  | <p>Discuss the generalisability (external validity) of the study results<br/><i>Expected that the sex dimorphic effects on cancer post-burn are generalisable.<br/>The evidence of increased cancer incidence after burn injury, with a greater effect in females, suggests the systemic immune response to burn injury may be a mediator of cancer susceptibility. (Page 13)</i></p>                                                                                                                                                                                                                                                                                                                                                                                                |
| <b>Other information</b> |     |                                                                                                                                                                                                                                                                                                                                                                                                                                                                                                                                                                                                                                                                                                                                                                                      |
| Funding                  | 22  | <p>Give the source of funding and the role of the funders for the present study and, if applicable, for the original study on which the present article is based<br/><i>Funding sources disclosed (Pages 3, 14)</i></p>                                                                                                                                                                                                                                                                                                                                                                                                                                                                                                                                                              |

\*Give information separately for cases and controls in case-control studies and, if applicable, for exposed and unexposed groups in cohort and cross-sectional studies.

1  
2  
3  
4  
5  
6  
7  
8  
9  
10  
11  
12  
13  
14  
15  
16  
17  
18  
19  
20  
21  
22  
23  
24  
25  
26  
27  
28  
29  
30  
31  
32  
33  
34  
35  
36  
37  
38  
39  
40  
41  
42  
43  
44  
45  
46  
47  
48  
49  
50  
51  
52  
53  
54  
55  
56  
57  
58  
59  
60

**Note:** An Explanation and Elaboration article discusses each checklist item and gives methodological background and published examples of transparent reporting. The STROBE checklist is best used in conjunction with this article (freely available on the Web sites of PLoS Medicine at <http://www.plosmedicine.org/>, Annals of Internal Medicine at <http://www.annals.org/>, and Epidemiology at <http://www.epidem.com/>). Information on the STROBE Initiative is available at [www.strobe-statement.org](http://www.strobe-statement.org).

For peer review only
